# Supplementary material for: Mental health and health-related quality of life among healthcare workers in Indonesia during the COVID-19 pandemic: a cross-sectional study
Source: PubMed Central journal article supplement — BMJ Open. 2022 Apr 8;12(4):e057963. doi: 10.1136/bmjopen-2021-057963 (PMC8996007; doi:10.1136/bmjopen-2021-057963), 2022-04-08
Supplement: bmjopen-2021-057963.draft_revisions.pdf [file bmjopen-2021-057963.draft_revisions.pdf]

# BMJ Open

BMJ Open is committed to open peer review. As part of this commitment we make the peer review history of every article we publish publicly available.

When an article is published we post the peer reviewers' comments and the authors' responses online. We also post the versions of the paper that were used during peer review. These are the versions that the peer review comments apply to.

The versions of the paper that follow are the versions that were submitted during the peer review process. They are not the versions of record or the final published versions. They should not be cited or distributed as the published version of this manuscript.

BMJ Open is an open access journal and the full, final, typeset and author-corrected version of record of the manuscript is available on our site with no access controls, subscription charges or pay-per-view fees (<http://bmjopen.bmj.com>).

If you have any questions on BMJ Open's open peer review process please email [info.bmjopen@bmj.com](mailto:info.bmjopen@bmj.com)

# BMJ Open

## Mental Health and Health-Related Quality of Life Among Healthcare Workers in Indonesia During COVID-19 Pandemic

|                               |                                                                                                                                                                                                                                                                                                                                                                                                                                                                                                                                                                                                                                                                                                                                                                                                                                                                                                                                                                                                                                                                                                                                                                                                                                                                                             |
|-------------------------------|---------------------------------------------------------------------------------------------------------------------------------------------------------------------------------------------------------------------------------------------------------------------------------------------------------------------------------------------------------------------------------------------------------------------------------------------------------------------------------------------------------------------------------------------------------------------------------------------------------------------------------------------------------------------------------------------------------------------------------------------------------------------------------------------------------------------------------------------------------------------------------------------------------------------------------------------------------------------------------------------------------------------------------------------------------------------------------------------------------------------------------------------------------------------------------------------------------------------------------------------------------------------------------------------|
| Journal:                      | <i>BMJ Open</i>                                                                                                                                                                                                                                                                                                                                                                                                                                                                                                                                                                                                                                                                                                                                                                                                                                                                                                                                                                                                                                                                                                                                                                                                                                                                             |
| Manuscript ID                 | bmjopen-2021-057963                                                                                                                                                                                                                                                                                                                                                                                                                                                                                                                                                                                                                                                                                                                                                                                                                                                                                                                                                                                                                                                                                                                                                                                                                                                                         |
| Article Type:                 | Original research                                                                                                                                                                                                                                                                                                                                                                                                                                                                                                                                                                                                                                                                                                                                                                                                                                                                                                                                                                                                                                                                                                                                                                                                                                                                           |
| Date Submitted by the Author: | 02-Oct-2021                                                                                                                                                                                                                                                                                                                                                                                                                                                                                                                                                                                                                                                                                                                                                                                                                                                                                                                                                                                                                                                                                                                                                                                                                                                                                 |
| Complete List of Authors:     | <p>Syamlan, Adila T.; Faculty of Medicine Universitas Airlangga Salamah, Sovia; Faculty of Medicine Universitas Airlangga, Department of Public Health and Preventive Medicine; University Medical Centre Groningen, Division of Nephrology, Department of Internal Medicine, University Medical Center Groningen, Groningen, The Netherland.</p> <p>Alkaff, Firas; Faculty of Medicine Universitas Airlangga, Department of Anatomy, Histology, and Pharmacology; University Medical Centre Groningen, Division of Nephrology, Department of Internal Medicine, University Medical Center Groningen, Groningen, The Netherland.</p> <p>Prayudi, Yogi E.; Faculty of Medicine Universitas Airlangga Kamil, Muhammad; Faculty of Medicine Universitas Airlangga, Department of Neurosurgery</p> <p>Irzaldy, Abyan; Karolinska Institute</p> <p>Karimah, Azimatul; Universitas Airlangga Fakultas Kedokteran, Psychiatry; Faculty of Medicine, Universitas Airlangga- dr. Soetomo Academic Medical Center</p> <p>Postma, Maarten; University of Groningen, Pharmacoepidemiology and Pharmacoeconomics</p> <p>Purba, Fredrick; Padjadjaran University, Department of Developmental Psychology</p> <p>Arifin, Bustanul; University of Groningen, Pharmacoepidemiology and Pharmacoeconomics</p> |
| Keywords:                     | COVID-19, MENTAL HEALTH, PUBLIC HEALTH                                                                                                                                                                                                                                                                                                                                                                                                                                                                                                                                                                                                                                                                                                                                                                                                                                                                                                                                                                                                                                                                                                                                                                                                                                                      |
|                               |                                                                                                                                                                                                                                                                                                                                                                                                                                                                                                                                                                                                                                                                                                                                                                                                                                                                                                                                                                                                                                                                                                                                                                                                                                                                                             |

SCHOLARONE™  
Manuscripts

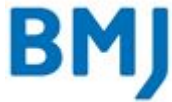

I, the Submitting Author has the right to grant and does grant on behalf of all authors of the Work (as defined in the below author licence), an exclusive licence and/or a non-exclusive licence for contributions from authors who are: i) UK Crown employees; ii) where BMJ has agreed a CC-BY licence shall apply, and/or iii) in accordance with the terms applicable for US Federal Government officers or employees acting as part of their official duties; on a worldwide, perpetual, irrevocable, royalty-free basis to BMJ Publishing Group Ltd ("BMJ") its licensees and where the relevant Journal is co-owned by BMJ to the co-owners of the Journal, to publish the Work in this journal and any other BMJ products and to exploit all rights, as set out in our [licence](#).

The Submitting Author accepts and understands that any supply made under these terms is made by BMJ to the Submitting Author unless you are acting as an employee on behalf of your employer or a postgraduate student of an affiliated institution which is paying any applicable article publishing charge ("APC") for Open Access articles. Where the Submitting Author wishes to make the Work available on an Open Access basis (and intends to pay the relevant APC), the terms of reuse of such Open Access shall be governed by a Creative Commons licence – details of these licences and which [Creative Commons](#) licence will apply to this Work are set out in our licence referred to above.

Other than as permitted in any relevant BMJ Author's Self Archiving Policies, I confirm this Work has not been accepted for publication elsewhere, is not being considered for publication elsewhere and does not duplicate material already published. I confirm all authors consent to publication of this Work and authorise the granting of this licence.

1  
2  
3 **1 Mental Health and Health-Related Quality of Life Among Healthcare Workers**  
4  
5  
6 **2 in Indonesia During COVID-19 Pandemic**

7  
8 **3 Running title:** HCW mental health and HRQoL during pandemic  
9

10  
11  
12  
13 5 Adila T. Syamlan<sup>1#</sup>, Sovia Salamah<sup>2,3##</sup>, Firas F. Alkaff<sup>3,4\*</sup>, Yogi E. Prayudi<sup>1</sup>,  
14  
15 6 Muhammad Kamil<sup>5</sup>, Abyan Irzaldy<sup>6</sup>, Azimatul Karimah<sup>7</sup>, Maarten J. Postma<sup>4,8,9,10,11</sup>,  
16  
17 7 Fredrick D. Purba<sup>12</sup>, Bustanul Arifin<sup>8,13</sup>  
18

19  
20  
21  
22 9 <sup>1</sup> Faculty of Medicine Universitas Airlangga, Surabaya, Indonesia

23  
24 10 <sup>2</sup> Department of Public Health and Preventive Medicine, Faculty of Medicine  
25  
26 11 Universitas Airlangga, Surabaya, Indonesia

27  
28  
29 12 <sup>3</sup>Department of Internal Medicine, University Medical Center Groningen, Groningen,  
30  
31 13 The Netherlands

32  
33 14 <sup>4</sup> Division of Pharmacology and Therapy, Department of Anatomy, Histology, and  
34  
35 15 Pharmacology, Faculty of Medicine Universitas Airlangga, Surabaya, Indonesia

36  
37 16 <sup>5</sup> Department of Neurosurgery, Faculty of Medicine Universitas Airlangga, Surabaya,  
38  
39 17 Indonesia

40  
41  
42 18 <sup>6</sup> Karolinska Institute, Solna, Sweden

43  
44  
45 19 <sup>7</sup> Department of Psychiatry, Faculty of Medicine Universitas Airlangga – Dr. Soetomo  
46  
47 20 General Academic Hospital, Surabaya, Indonesia

48  
49 21 <sup>8</sup> Department of Health Sciences, University of Groningen, University Medical Center  
50  
51 22 Groningen, Groningen, The Netherlands

52  
53  
54 23 <sup>9</sup> Institute of Science in Healthy Ageing & healthcaRE (SHARE), University Medical  
55  
56 24 Center Groningen, University of Groningen, Groningen, The Netherlands  
57  
58  
59  
60

1  
2  
3 10 Unit of Pharmacotherapy, Epidemiology and Economics (PTE2), Department of  
4  
5 2 Pharmacy, University of Groningen, Groningen, The Netherlands  
6

7  
8 3 11 Department of Economics, Econometrics and Finance, Faculty of Economics &  
9  
10 4 Business, University of Groningen, Groningen, The Netherlands  
11

12 5 12 Department of Developmental Psychology, Faculty of Psychology, Universitas  
13  
14 6 Padjadjaran, Bandung, Indonesia  
15

16  
17 7 13 Pharmacy Faculty, Universitas Hasanuddin, Makassar, Sulawesi Selatan, Indonesia  
18

19  
20 8

21  
22 9 #These authors contribute equally and are shared first author in this work.  
23

24 10 \*Corresponding authors:

25  
26 11 Sovia Salamah  
27

28  
29 12 Hanzeplein 1, 9713GZ, Groningen, The Netherlands / Jl. Mayjen Prof. Dr. Moestopo  
30

31  
32 13 No 47, Surabaya, East Java 60132, Indonesia.

33  
34 14 Email: [s.salamah@umcg.nl](mailto:s.salamah@umcg.nl) / [sovia.salamah@fk.unair.ac.id](mailto:sovia.salamah@fk.unair.ac.id)  
35

36  
37 15 Telephone: +31651114511 / +6282244485448  
38

39  
40 16

41  
42 17 Firas Farisi Alkaff  
43

44  
45 18 Hanzeplein 1, 9713GZ, Groningen, The Netherlands / Jl. Mayjen Prof. Dr. Moestopo  
46

47  
48 19 No 47, Surabaya, East Java 60132, Indonesia.

49  
50 20 Email: [f.f.alkaff@umcg.nl](mailto:f.f.alkaff@umcg.nl) / [firmasfarisialkaff@fk.unair.ac.id](mailto:firmasfarisialkaff@fk.unair.ac.id)  
51

52  
53 21 Telephone: +31616383945 / +6281330101993  
54

55  
56 22

57  
58 23 **Keywords:** anxiety; COVID-19; depression; Indonesia; Quality of life; stress  
59

60  
24 **Word counts:** 2930 words

## 1 **Abstract**

2 **Objectives:** Healthcare workers (HCWs) reflect the frontier during COVID-19  
3 pandemics. They are more exposed to COVID-19 than other professions. Studies  
4 from other countries have shown that HCWs mental health and health-related quality  
5 of life (HRQoL) were affected during this pandemic. However, studies about mental  
6 health in Indonesia are still scarce, and no study has been done to evaluate the  
7 HRQoL among HCWs. Thus, this study aims to explore the mental health status and  
8 HRQoL among HCWs in Indonesia.

9 **Design:** Cross sectional study.

10 **Setting:** Open online survey in Indonesia from December 2020 – February 2021.

11 **Participants:** HCWs who worked during COVID-19 pandemic. There were 502  
12 respondents that filled the online questionnaire, and 392 respondents were included  
13 for the analysis.

14 **Outcomes:** Mental health status that was measured using DASS-21 questionnaire and  
15 HRQoL that was measured using SF12v2 questionnaire.

16 **Results:** Prevalence of depression, anxiety, and stress among HCWs that was  
17 measured using the DASS-21 questionnaire were 29.4%, 44.9%, and 31.8%,  
18 respectively. Using the SF12v2 questionnaire, it was found that 354 (90.3%) HCWs  
19 were impaired in the physical component and 156 (39.8%) HCWs with impaired  
20 mental component.

21 **Conclusion:** The prevalence of mental health problems among HCWs was high in  
22 Indonesia. HRQoL, especially regarding physical component, was affected in most  
23 HCWs. Thus, policymakers should pay attention to HCWs' mental health and  
24 HRQoL during this COVID-19 pandemic.

25

1  
2  
3 **1 Strength and limitations of this study**  
4

- 5  
6 2 • This is the first study to evaluate the prevalence of both mental health status  
7  
8 3 and HRQoL during the COVID-19 pandemic in Indonesia.  
9  
10 4 • The cross-sectional design is considered the most feasible approach both  
11  
12 5 logically and logistically to obtain representative samples in Indonesia during  
13  
14 6 COVID-19 pandemic.  
15  
16 7 • Temporal relationships between the course of the COVID-19 pandemic and  
17  
18 8 mental health issues could not be identified.  
19  
20  
21  
22  
23  
24  
25  
26  
27  
28  
29  
30  
31  
32  
33  
34  
35  
36  
37  
38  
39  
40  
41  
42  
43  
44  
45  
46  
47  
48  
49  
50  
51  
52  
53  
54  
55  
56  
57  
58  
59  
60

## 1 **Background**

2 Coronavirus disease 2019 (COVID-19), caused by new strain of the coronavirus  
3 (Systemic Acute Respiratory Syndrome Coronavirus 2; SARS-CoV-2) emerged in  
4 December 2019 in Wuhan, Hubei Province of China <sup>1</sup>. This virus is related to  
5 SARS-CoV-1 which is known as the cause of SARS back in 2002 and also of 2012's  
6 Middle East Respiratory Syndrome (Mers-CoV) <sup>2</sup>. As of 11 March 2020, WHO  
7 characterized COVID-19 as a pandemic <sup>3</sup>. To this date, there were over 223 million  
8 confirmed cases with over 4 million of deaths, worldwide <sup>4</sup>. In Indonesia, the first  
9 official confirmed case of COVID-19 was on 2 March 2020 <sup>5</sup>. Afterwards, the number  
10 of reported cases in Indonesia has been exponentially increasing. There are currently  
11 over 3.9 million confirmed cases with more than 121 thousand deaths <sup>6</sup>.

12  
13 Healthcare workers (HCWs) reflect the frontier during COVID-19 pandemic. They  
14 are more exposed to COVID-19 than other professions. Worldwide, the total number  
15 of deaths among HCWs are over 155 thousand deaths <sup>7</sup>. In Indonesia, the total number  
16 of deaths among HCWs are 2030 deaths to this date <sup>8</sup>. Although the reported mortality  
17 rate among HCWs is lower than in the general population <sup>9,10</sup>, higher levels of mental  
18 health problems were found among HCWs <sup>11</sup>. Heavy workload and lack of personal  
19 protective equipment (PPE) are highlighted as profession-related contributing risk  
20 factors <sup>12</sup>.

21  
22 A recently published systematic review revealed that the prevalence of depression and  
23 anxiety was 24.3% and 25.8% among HCWs <sup>13</sup>. This prevalence is significantly  
24 higher compared to data from WHO on common mental disorders among the global  
25 general population where the prevalence was only 4.4% for depression and 3.6% for



1 anxiety. However, studies included in this meta-analysis are predominantly from  
2 China, and no study from Indonesia is included <sup>13</sup>. To this date, studies regarding  
3 mental health among HCWs in Indonesia are still scarce and are either focusing on a  
4 certain HCW profession or only conducted in one part of the country <sup>14-18</sup>.

5  
6 Other than mental health problems, health-related quality of life (HRQoL) in general  
7 is also affected during the COVID-19 pandemic <sup>19</sup>. Currently, there are a few  
8 published studies that evaluate the HRQoL among HCWs during COVID-19 <sup>20-28</sup>, but  
9 no such study has been done in Indonesia. Thus, this study aims to explore the mental  
10 health status and HRQoL among HCWs in Indonesia and to identify the determinant  
11 factors.

## 1 **Methods**

### 2 Study design

3 This study was a cross-sectional study using an open online questionnaire.  
4 SurveyMonkey® was used as the survey platform. Using this survey platform, each  
5 respondent can only participate in the questionnaire once because the IP address was  
6 used to identify potential duplicate entries from the same respondent. The  
7 questionnaire link was distributed through social media, i.e., WhatsApp and Instagram,  
8 the most popular and accessible social media platforms in Indonesia.

### 10 Participants

11 Study participants were HCWs in Indonesia. Inclusion criteria were HCWs who were  
12 actively working during the COVID-19 pandemic and agreed to become a respondent  
13 in this study. Informed consent was obtained from each respondent. Data collection  
14 were conducted from December 2020 until February 2021. The minimum required  
15 sample size was calculated using EpiInfo™<sup>29</sup>. A minimum of 383 samples were  
16 needed to get sufficient statistical power, assuming 95% confidence intervals.

### 18 Ethics

19 This study was performed in line with the principles of the Declaration of Helsinki  
20 and approved by relevant Institutional Reviewer Board. The data were kept  
21 confidential and no personally identifiable information was reported.

### 23 Instruments

24 There were a total of 60 questions in the questionnaire, separated into 4 pages. The  
25 time needed to complete the questionnaire was 15-20 minutes. All questions were

1 mandatory to answer, and respondents could not moved to the next page if all  
2 questions in the previous page had been answered. Before submitting the  
3 questionnaire, respondents were able to review and change their answer.

4  
5 Background and demographic characteristics of each respondent were obtained  
6 utilizing a questionnaire including questions about the respondent's gender, age,  
7 marital status, specific job, workplace setting during pandemic, workplace island,  
8 working experience as HCWs before COVID-19 pandemic, working hour per week,  
9 monthly income, history of COVID-19 infection, comorbidities, availability of  
10 personal protective equipment in the workplace, verbal or physical intimidation in the  
11 workplace, intimidation from the society outside the workplace, support from the  
12 workplace if there is any intimidation, willingness to work during COVID-19  
13 pandemic, and reason of working during the COVID-19 pandemic.

14  
15 Mental health was measured using Indonesian version of Depression, Anxiety, and  
16 Stress scale (DASS-21)<sup>30</sup>. This questionnaire has been adapted to Bahasa Indonesia  
17 previously and showed good validity and reliability.<sup>31</sup> DASS-21 was a  
18 self-administered questionnaire consisting of depression, anxiety, and stress subscales,  
19 each composed of 7 items, (21 items in total). Every item could have a score ranging  
20 from 0, indicating lack of symptoms in the past week, to 3, indicating presence of  
21 symptoms for almost every day in the past week. To calculate the final score of each  
22 subscale, the score was multiplied by 2. The minimum final score was 0 and the  
23 maximum score was 42 for each subscale. Based on the total score, mental health can  
24 be categorized into normal or mild, moderate, severe, or extremely impaired (**table 1**)

25 <sup>30</sup>.

1  
2  
3 1  
4  
5 2 HRQoL was evaluated using the SF12v2 health survey (12 items, license number:  
6  
7 3 QM054173)<sup>32</sup>. The use of SF12v2 to evaluate HRQoL was based on the  
8  
9 4 consideration that it can be used in non-patient populations and has fewer question  
10  
11 5 than other HRQoL questionnaires. SF12v2 has been adapted to Bahasa Indonesia  
12  
13 6 previously and showed good validity and reliability.<sup>33</sup> This questionnaire measures  
14  
15 7 both physical and mental health components that are divided into 8 health domain  
16  
17 8 scales, i.e.: physical functioning (PF), role physical (RP), bodily pain (BP), general  
18  
19 9 health (GH), vitality (VT), social functioning (SF), role emotional (RE), and mental  
20  
21 10 health (MH). PF, RP, BP, and GH have the greatest physical component amongst the  
22  
23 11 health domains, whilst VT, SF, RE, and MH have the greatest mental component<sup>32</sup>.  
24  
25 12 The explanations of each domain scales have been described elsewhere<sup>33</sup>. Scoring of  
26  
27 13 SF12v2 was performed using Optum® PRO CoRE software (Optum PROCoRE 1.3  
28  
29 14 Smart Measurement System. Optum Inc., USA). The software will generate the score  
30  
31 15 for each health domain, and also the physical and mental components summary scores.  
32  
33 16 Score of less than 47 indicates significant impairment in the associated health domain  
34  
35 17<sup>32</sup>.  
36  
37  
38  
39  
40  
41  
42  
43  
44  
45

### 19 Data analysis

46  
47 20 Only completed questionnaire were included in the data analysis. Acquired data were  
48  
49 21 analyzed using IBM SPSS Statistics for Windows version 25.0. (IBM Corp., Armonk,  
50  
51 22 NY, USA). *p* value < .05 was considered statistically significant. One-sample  
52  
53 23 Kolmogorov-Smirnov test was used to evaluate the data distribution. To discover the  
54  
55 24 determinants of mental health and HRQoL, multiple logistic regression analysis using  
56  
57 25 backward selection was used. Data analysis was conducted in two phases. In the first  
58  
59  
60

1 phase, univariate logistic regression was used to identify independent variables that  
2 were associated with mental health status and quality of life. Variables with  $p$  value  
3  $< .1$  were included in the next phase. In the second phase, multivariate logistic  
4 regression using backward selection was used. Variables with  $p$  value  $< .05$  from  
5 multivariate regression analysis were considered as the determinants<sup>34</sup>. During the  
6 analysis to find the determinants, mental health variables were re-categorized into  
7 dichotomous (normal or not) variables with the cut-off as follow: 9 for depression, 6  
8 for anxiety, and 10 for stress<sup>30</sup>.

#### 10 Patient and public involvement

11 No patient involved.

## 1 **Results**

2 There were 502 HCWs that accessed the online questionnaire, and 392 of them were  
3 included for the analysis. The total response rate for this study was 78% (**Figure 1**).

4 The detailed sociodemographic characteristic of the respondents is summarized in  
5 **Table 2**.

### 6 Mental Health

7 The depression, anxiety, and stress subscales median scores were 6 [IQR: 2 – 10], 6 [2  
8 – 12], and 10 [4 – 10], respectively. There were 119 (29.4%) respondents that had  
9 depression, 176 (44.9%) that had anxiety, and 164 (31.8%) that had stress (**Figure 2**).  
10 Stratified by gender, the prevalence among male HCWs were 27 (21.3%), 42 (33.1%),  
11 and 45 (35.4%), and 92 (34.7%), 134 (50.6%), and 119 (44.9%) for females, for  
12 depression, anxiety, and stress, respectively (**Supplementary Figure 1 and 2**).

13  
14  
15 To find the determinants of depression among HCWs, multivariate logistic regression  
16 analysis was performed by including all variables that had a *p* value of < .1 in the  
17 univariate analysis (**Supplementary table 1**). Female HCWs, HCWs that did not  
18 receive support from the workplace when intimidated by the patients' or patient  
19 family members due to COVID-19-related issue, and HCWs that worked during the  
20 pandemic because they were bound to working contracts were more likely to be  
21 depressed. Meanwhile, HCWs with working experience of more than 3 years in the  
22 healthcare facilities were less likely to be depressed (**Table 3**).

23  
24 To find the determinants of anxiety among HCWs, multivariate logistic regression  
25 analysis was performed by including all variables that had a *p* value of < .1 in the  
26 univariate analysis (**Supplementary table 2**). Female HCWs and HCWs that did not

1  
2  
3 1 receive support from the workplace when intimidated by the patients' or patient  
4  
5 2 family members were more likely to be anxious, and HCWs who were not actually  
6  
7 3 willing to work during COVID-19 pandemic were more likely to be anxious.  
8  
9 4 Meanwhile, older HCWs and HCWs who worked at other than COVID-19 hospital or  
10  
11 5 referral hospital for COVID-19 were less likely to be anxious (**Table 4**).  
12  
13  
14  
15  
16

17 7 To find the determinants of stress among HCWs, multivariate logistic regression  
18  
19 8 analysis was performed by including all variables that had a *p* value of < .1 in the  
20  
21 9 univariate analysis (**Supplementary Table 3**). HCWs that did not receive support  
22  
23 10 from the workplace when intimidated by the patients' or patient family members,  
24  
25 11 HCWs who are not actually willing to work during COVID-19 pandemic, and HCWs  
26  
27 12 that worked during pandemic because of financial matters or because they were bound  
28  
29 13 to working contract were more likely to be stressed. Meanwhile, older HCWs were  
30  
31 14 less likely to be stressed (**Table 5**).  
32  
33  
34  
35  
36  
37

#### 38 HRQoL

39  
40 17 The median [IQR] score of physical component summary was 41.80 [39.15 – 44.14],  
41  
42 18 and the median [IQR] score of mental component summary was 49.81 [43.25 – 55.95].  
43  
44 19 The detailed score of physical and mental components and each health domain scale  
45  
46 20 are summarized in **Figure 3**. There were 354 (90.3%) HCWs that had an impairment  
47  
48 21 in the physical component and 156 (39.8%) HCWs that had an impairment in the  
49  
50 22 mental component (**Figure 4**).  
51  
52  
53  
54  
55

56 24 To find the determinants of impaired physical and mental health components among  
57  
58 25 HCWs, multivariate logistic regression analysis was performed by including all  
59  
60

- 1 variables that had a  $p$  value of  $< .1$  in the univariate analysis (**Supplementary table 4**
- 2 **and 5**). However, no determinant was found in the multivariate analysis.

For peer review only



## 1 **Discussion**

2 The results of this study provides additional information on the mental health  
3 conditions and HRQoL among Indonesian HCWs. This study also identified several  
4 significant determinants of stress, anxiety, and depression among HCWs. This may  
5 also act as a guide for relevant actions that can be taken by relevant authorities to  
6 provide preventive efforts on mental health matters.

### 7 8 Mental Health

9 The prevalence of depression, anxiety, and stress observed in this study was 29.4%,  
10 44.9%, and 31.8%, respectively. The prevalence of depression and anxiety in our  
11 study was higher than the estimate from recent meta-analysis study among HCWs  
12 which yielded pooled prevalence estimate of 24.3% (95% CI, 18.2 – 31.6%) for  
13 depression and 25.8% (95% CI, 20.5 – 31.9%) for anxiety <sup>13</sup>, whilst the prevalence for  
14 stress in our study was lower than the result yielded from recent meta-analysis study  
15 with the pooled estimated stress prevalence of 45% (95% CI, 24.3 – 67.5%) <sup>13</sup>. The  
16 discrepancy might be due to the time difference in the study period, where the  
17 meta-analysis study included studies that were published until June 2020, whilst our  
18 study was conducted in a later period. The discrepancy might also be explained by the  
19 disparity of COVID-19 pandemic impact on mental health status between countries,  
20 since the number of cases and deaths, the impact on healthcare systems, and  
21 government policies differ. Also, the questionnaire used in this study was DASS-21,  
22 while in other studies other questionnaires were applied. Notably, in the recent  
23 meta-analysis study <sup>13</sup>, the DASS-21 questionnaire was only used in 7 out of 29  
24 studies.

25

1  
2  
3 1 There have been a few published studies that also evaluates the mental health status  
4  
5 2 among HCWs in Indonesia <sup>14-18</sup>, and some use the same questionnaire as our study.  
6  
7  
8 3 The prevalence in our study was higher than in previous studies with the same  
9  
10 4 questionnaire, where the prevalence was ranging from 2.4 – 13.2% for depression,  
11  
12 5 6.8% - 20.6% for anxiety, and 5.7 – 11% <sup>14, 15, 17</sup>. The discrepancy between our study  
13  
14 6 and the previous studies might lies in the time period difference for the data collection,  
15  
16 7 where in our study it was conducted in the later time of the pandemic while in the  
17  
18 8 previous studies it was conducted in the beginning of the pandemic. We argue that in  
19  
20 9 the beginning of the pandemic, the mental health status is not as affected as in the  
21  
22 10 later periods. Also, previous studies only focus on a specific types of HCWs <sup>15, 17</sup>,  
23  
24 11 specific provinces in Indonesia <sup>17</sup>, or the majority of the respondents were clerical  
25  
26 12 staff/executive instead of physician or nurses as the frontline HCWs <sup>14</sup>. Despite the  
27  
28 13 prevalence discrepancy between our study and previous studies in Indonesia, the  
29  
30 14 prevalence difference between depression, anxiety, and stress showed the same  
31  
32 15 pattern where the prevalence of anxiety was the highest.  
33  
34  
35  
36  
37  
38  
39

40 17 We found that the prevalence of depression, anxiety, and stress were higher in female  
41  
42 18 HCWs compared to male HCWs (**Supplementary figure 1 and 2**). Moreover, we  
43  
44 19 also found that female sex is an independent risk factor for depression and anxiety  
45  
46 20 (**table 3 and 4**). Similarly, other studies also showed that there are gender differences  
47  
48 21 in mental health problem among HCWs during COVID-19 pandemic, where it is  
49  
50 22 more prevalent in female HCWs <sup>35, 36</sup>. This can be explained by the fact that females  
51  
52 23 in general have higher rates of mood and anxiety disorders due to higher mean level  
53  
54 24 of internalizing <sup>37</sup>, and also potentially by the influence of sex hormones <sup>38</sup>.  
55  
56  
57  
58  
59  
60

1  
2  
3 1 A recent study in Indonesia among nurses who worked during the COVID-19  
4  
5 2 pandemic showed that rejection by the family and/or neighbors is a determinant factor  
6  
7 3 for depression, anxiety, and stress <sup>15</sup>. We also found similar finding, where  
8  
9 4 intimidation from the society is a risk factor for depression, anxiety, and stress in the  
10  
11 5 univariate analysis (**supplementary table 1, 2, 3**). However, this variable lost its  
12  
13 6 significance in the multivariate analysis. Meanwhile, workplace support related to  
14  
15 7 potential intimidation was shown to lower the risk of depression, anxiety, and stress.  
16  
17 8 This indicates that workplace environment plays a more substantial role in mental  
18  
19 9 health. Havaei et al (2021) found that negative rating of workplace conditions such as  
20  
21 10 workplace relations, workplace safety, organizational support and preparedness were  
22  
23 11 associated with adverse mental health outcomes during COVID-19 pandemic <sup>39</sup>. A  
24  
25 12 narrative review focusing on mental health of HCWs during the COVID-19 pandemic  
26  
27 13 also stated that intrinsic high-risk professional, organizational factors such as lack of  
28  
29 14 workplace support, and vulnerable workers such as frontline HCWs are at higher  
30  
31 15 likelihood to experience a mental issue during pandemic <sup>40</sup>.  
32  
33  
34  
35  
36  
37  
38  
39

#### 40 HRQoL

41  
42 18 There are many established HRQoL questionnaires that can be used to this date. In  
43  
44 19 previously published studies about HRQoL among HCWs during the COVID-19  
45  
46 20 pandemic, several HRQoL questionnaires were used, i.e. WHOQOL-BREF <sup>20, 24, 26</sup>,  
47  
48 21 EQ-5D <sup>27, 28</sup>, SF36 <sup>21</sup>, and SF12 <sup>25</sup>. Since we used SF12v2 to evaluate HRQoL in this  
49  
50 22 study, we argue that it is better to compare our finding with previous studies that use  
51  
52 23 either SF12 or SF36. The physical component and mental component summary scores  
53  
54 24 in previous studies were higher compared to our study <sup>21, 25</sup>, indicating that the  
55  
56 25 HRQoL in previous studies was better. We also found that 39.8% HCWs had an  
57  
58  
59  
60

1  
2  
3 1 impairment in the mental component, and 90.3% of HCWs had an impairment in the  
4  
5 2 physical component. However, we cannot compare the prevalence of our finding with  
6  
7 3 previous studies since previous studies did not present the prevalence of HCWs with  
8  
9 4 impaired physical and mental health components <sup>21, 25</sup>.

10  
11  
12 5  
13  
14 6 Worse HRQoL in this study might be caused by the time difference of study period,  
15  
16 7 where previous studies were conducted in the beginning of the pandemic and our  
17  
18 8 study was conducted later <sup>21, 25</sup>. Similar to the mental health status, we would argue  
19  
20 9 that the HRQoL of HCWs in the beginning of the pandemic was not as affected as in  
21  
22 10 the later period. Compared to the beginning of the pandemic, the number of  
23  
24 11 COVID-19 patients in the later period were significantly higher <sup>6</sup>. Increasing number  
25  
26 12 of patients will increase the workload of the HCWs, even if the working hour is not  
27  
28 13 prolonged. Over time, increasing workload will lead to physical exhaustion of the  
29  
30 14 HCWs. Other than that, the number of deaths of COVID-19 patients also increasing  
31  
32 15 over time. Constant exposure of dealing with death and dying, in addition to the high  
33  
34 16 workload, are considered as occupational stressors <sup>41</sup>.

## 1 **Conclusion**

2 The prevalence of depression, anxiety, and stress among HCWs in Indonesia during  
3 the COVID-19 pandemic were 29.4%, 44.9%, and 31.8%, respectively. Our study  
4 suggests that workplace environment is where interventions to prevent and mitigate  
5 mental issues are most needed. Other than that, more attention is needed for female  
6 HCWs, since female HCWs seem at higher risk of developing mental health issues.  
7 Notably, HRQoL, especially regarding physical component, was also affected. Thus,  
8 we recommend policymakers to pay extra attention to HCWs' mental health and  
9 HRQoL during COVID-19 pandemic. Future studies with larger sample sizes and also  
10 periodical evaluation may further contribute to adequately monitor the mental health  
11 and HRQoL of the HCWs throughout this pandemic and design corresponding  
12 support and interventions.

13  
14  
15 **Contributions:** ATS, SS, FFA, MK, MJP, FDP, and BA were involved in the  
16 conceptualization and the design of the study. ATS, SS, FFA, YEP, MK, AK, and BA  
17 carried out the data collection. SS, FFA, and AI conducted the analysis, and FDP, and  
18 BA were the main consultants in the data interpretation. ATS, SS, FFA, and AI  
19 drafted the manuscript, and all the authors revised it. All the authors read and  
20 approved the final manuscript.

21 **Funding:** This research received no specific grant from any funding agency in the  
22 public, commercial or not-for-profit sectors.

23 **Competing interests:** MJP received grants and honoraria from various  
24 pharmaceutical companies, all fully unrelated to this research. Other authors have no  
25 conflict of interest to declare.

1  
2  
3 1 **Ethics approval:** Approval was granted by the Institutional Review Board of Faculty  
4  
5 of Medicine Universitas Airlangga (Date 5 October 2020 / No.  
6  
7 251/EC/KEPK/FKUA/2020).  
8  
9

10 4 **Acknowledgement:** The authors would like to thank QualityMetric Incorporated,  
11  
12 5 LLC for giving free SF12v2® licensing package for this study.  
13  
14  
15  
16  
17  
18  
19  
20  
21  
22  
23  
24  
25  
26  
27  
28  
29  
30  
31  
32  
33  
34  
35  
36  
37  
38  
39  
40  
41  
42  
43  
44  
45  
46  
47  
48  
49  
50  
51  
52  
53  
54  
55  
56  
57  
58  
59  
60

For peer review only

## References

1. Khan S, Siddique R, Bai Q, Shabana, Liu Y, Xue M, et al. Coronaviruses disease 2019 (COVID-19): Causative agent, mental health concerns, and potential management options. *Journal of infection and public health*. 2020;13(12):1840-4.
2. Fauci AS, Lane HC, Redfield RR. Covid-19 - Navigating the Uncharted. *The New England journal of medicine*. 2020;382(13):1268-9.
3. World Health Organization. Rolling updates on coronavirus disease (COVID-19) 2020 [updated 31 July 2020. Available from: <https://www.who.int/emergencies/diseases/novel-coronavirus-2019/events-as-they-happen>.
4. World Health Organization. WHO Coronavirus (COVID-19) Dashboard 2021 [updated 10 September 2021. Available from: <https://covid19.who.int/>.
5. World Health Organization Indonesia. Coronavirus Disease 2019 (COVID-19) Situation Report - 1 2020 [updated 27 March 2020. Available from: <https://www.who.int/indonesia/news/novel-coronavirus/situation-reports>.
6. World Health Organization Indonesia. Coronavirus Disease 2019 (COVID-19) Situation Report - 68 2021 [updated 18 August 2021. Available from: <https://www.who.int/indonesia/news/novel-coronavirus/situation-reports>.
7. World Health Organization. Director-General's opening remarks at the World Health Assembly - 24 May 2021 2021 [updated 24 May 2021. Available from: <https://www.who.int/director-general/speeches/detail/director-general-s-opening-remarks-at-the-world-health-assembly--24-may-2021>.
8. Lapor Covid-19. Pusara Digital Tenaga Kesehatan Indonesia. 2021 [updated 13 September 2021. Available from: <https://nakes.laporcovid19.org/>.
9. Bandyopadhyay S, Baticulon RE, Kadhun M, Alser M, Ojuka DK, Badereddin Y, et al. Infection and mortality of healthcare workers worldwide from COVID-19: a systematic review. *BMJ global health*. 2020;5(12).
10. Diez-Manglano J, Solis-Marquinez MN, Alvarez Garcia A, Alcala-Rivera N, Maderuelo Riesco I, Gerico Aseguinolaza M, et al. Healthcare workers hospitalized due to COVID-19 have no higher risk of death than general population. Data from the Spanish SEMI-COVID-19 Registry. *PLoS one*. 2021;16(2):e0247422.
11. Vindegaard N, Benros ME. COVID-19 pandemic and mental health consequences: Systematic review of the current evidence. *Brain, behavior, and immunity*. 2020;89:531-42.
12. De Kock JH, Latham HA, Leslie SJ, Grindle M, Munoz SA, Ellis L, et al. A rapid review of the impact of COVID-19 on the mental health of healthcare workers: implications for supporting psychological well-being. *BMC public health*. 2021;21(1):104.
13. Salari N, Khazaie H, Hosseini-Far A, Khaledi-Paveh B, Kazemian M, Mohammadi M, et al. The prevalence of stress, anxiety and depression within front-line healthcare workers caring for COVID-19 patients: a systematic review and meta-regression. *Hum Resour Health*. 2020;18(1):100.
14. Chew NWS, Ngiam JN, Tan BY, Tham SM, Tan CY, Jing M, et al. Asian-Pacific perspective on the psychological well-being of healthcare workers during the evolution of the COVID-19 pandemic. *BJPsych Open*. 2020;6(6):e116.
15. Marthoenis, Maskur, Fathiariani L, Nassimbwa J. Investigating the burden of mental distress among nurses at a provincial COVID-19 referral hospital in Indonesia: a cross-sectional study. *BMC Nurs*. 2021;20(1):76.
16. Setiawati Y, Wahyuhadi J, Joestandari F, Maramis MM, Atika A. Anxiety and Resilience of Healthcare Workers During COVID-19 Pandemic in Indonesia. *Journal of multidisciplinary healthcare*. 2021;14:1-8.
17. Sitanggang FP, Wirawan GBS, Wirawan IMA, Lesmana CBJ, Januraga PP. Determinants of Mental Health and Practice Behaviors of General Practitioners During COVID-19 Pandemic in Bali, Indonesia: A Cross-sectional Study. *Risk Manag Healthc Policy*. 2021;14:2055-64.
18. Sunjaya DK, Herawati DMD, Siregar AYM. Depressive, anxiety, and burnout symptoms on health care personnel at a month after COVID-19 outbreak in Indonesia. *BMC public health*. 2021;21(1):227.
19. Melo-Oliveira ME, Sa-Caputo D, Bachur JA, Paineiras-Domingos LL, Sonza A, Lacerda AC, et al. Reported quality of life in countries with cases of COVID19: a systematic review. *Expert review of respiratory medicine*. 2021;15(2):213-20.



1  
2  
3  
4  
5  
6  
7  
8  
9  
10  
11  
12  
13  
14  
15  
16  
17  
18  
19  
20  
21  
22  
23  
24  
25  
26  
27  
28  
29  
30  
31  
32  
33  
34  
35  
36  
37  
38  
39  
40  
41  
42  
43  
44  
45  
46  
47  
48  
49  
50  
51  
52  
53  
54  
55  
56  
57  
60

- 1 20. Woon LS, Mansor NS, Mohamad MA, Teoh SH, Leong Bin Abdullah MFI. Quality of Life and Its  
2 Predictive Factors Among Healthcare Workers After the End of a Movement Lockdown: The Salient  
3 Roles of COVID-19 Stressors, Psychological Experience, and Social Support. *Frontiers in psychology*.  
4 2021;12:652326.
- 5 21. Stojanov J, Malobabic M, Stanojevic G, Stevic M, Milosevic V, Stojanov A. Quality of sleep and  
6 health-related quality of life among health care professionals treating patients with coronavirus  
7 disease-19. *The International journal of social psychiatry*. 2020:20764020942800.
- 8 22. Celmece N, Menekay M. The Effect of Stress, Anxiety and Burnout Levels of Healthcare  
9 Professionals Caring for COVID-19 Patients on Their Quality of Life. *Frontiers in psychology*.  
10 2020;11:597624.
- 11 23. Suryavanshi N, Kadam A, Dhumal G, Nimkar S, Mave V, Gupta A, et al. Mental health and quality  
12 of life among healthcare professionals during the COVID-19 pandemic in India. *Brain and behavior*.  
13 2020;10(11):e01837.
- 14 24. da Costa Matos RA, Akutsu R, Zandonadi RP, Botelho RBA. Quality of Life Prior and in the Course  
15 of the COVID-19 Pandemic: A Nationwide Cross-Sectional Study with Brazilian Dietitians. *International  
16 journal of environmental research and public health*. 2021;18(5).
- 17 25. Amerio A, Bianchi D, Santi F, Costantini L, Odone A, Signorelli C, et al. Covid-19 pandemic impact  
18 on mental health: a web-based cross-sectional survey on a sample of Italian general practitioners.  
19 *Acta bio-medica : Atenei Parmensis*. 2020;91(2):83-8.
- 20 26. An Y, Yang Y, Wang A, Li Y, Zhang Q, Cheung T, et al. Prevalence of depression and its impact on  
21 quality of life among frontline nurses in emergency departments during the COVID-19 outbreak.  
22 *Journal of affective disorders*. 2020;276:312-5.
- 23 27. Manh Than H, Minh Nong V, Trung Nguyen C, Phu Dong K, Ngo HT, Thu Doan T, et al. Mental  
24 Health and Health-Related Quality-of-Life Outcomes Among Frontline Health Workers During the  
25 Peak of COVID-19 Outbreak in Vietnam: A Cross-Sectional Study. *Risk management and healthcare  
26 policy*. 2020;13:2927-36.
- 27 28. Martín J, Padierna Á, Villanueva A, Quintana JM. Evaluation of the mental health of health  
28 professionals in the COVID-19 era. What mental health conditions are our health care workers facing  
29 in the new wave of coronavirus? *International Journal of Clinical Practice*.n/a(n/a):e14607.
- 30 29. Dean AG, Arner TG, Sunki GG, Friedman R, Lantinga M, Sangam S, et al. *Epi Info™*, a database  
31 and statistics program for public health professionals. Atlanta, GA: CDC; 2011.
- 32 30. Lovibond SH, Lovibond PF. *Manual for the Depression Anxiety Stress Scales*. 2nd ed. Sydney,  
33 Australia: Psychology Foundation; 1995.
- 34 31. El-Matary HJ, Lestari FA, Besral. Depression, anxiety and stress among undergraduate students  
35 in jakarta: Examining scores of the depression anxiety and stress scale according to origin and  
36 residency. *Indian Journal of Public Health Research and Development*. 2018;9(2):290-5.
- 37 32. Maruish ME. *User's manual for the SF-12v2 Health Survey*. 3rd ed. Lincoln, RI: QualityMetric  
38 Incorporated; 2012.
- 39 33. Wicaksana AL, Maharani E, Hertanti NS. The Indonesian version of the Medical Outcome Survey -  
40 Short Form 12 version 2 among patients with cardiovascular diseases. *International Journal of Nursing  
41 Practice*. 2020;26(2):e12804.
- 42 34. Flynn J, Alkaff FF, Sukmajaya WP, Salamah S. Comparison of WHO growth standard and national  
43 Indonesian growth reference in determining prevalence and determinants of stunting and  
44 underweight in children under five: a cross-sectional study from Musi sub-district. *F1000Res*.  
45 2020;9:324.
- 46 35. Liu S, Yang L, Zhang C, Xu Y, Cai L, Ma S, et al. Gender differences in mental health problems of  
47 healthcare workers during the coronavirus disease 2019 outbreak. *J Psychiatr Res*. 2021;137:393-400.
- 48 36. De Sio S, Buomprisco G, La Torre G, Lapteva E, Perri R, Greco E, et al. The impact of COVID-19 on  
49 doctors' well-being: results of a web survey during the lockdown in Italy. *Eur Rev Med Pharmacol Sci*.  
50 2020;24(14):7869-79.
- 51 37. Eaton NR, Keyes KM, Krueger RF, Balsis S, Skodol AE, Markon KE, et al. An invariant dimensional  
52 liability model of gender differences in mental disorder prevalence: evidence from a national sample.  
53 *J Abnorm Psychol*. 2012;121(1):282-8.
- 54 38. Li SH, Graham BM. Why are women so vulnerable to anxiety, trauma-related and stress-related  
55 disorders? The potential role of sex hormones. *Lancet Psychiatry*. 2017;4(1):73-82.
- 56 39. Havaei F, Ma A, Staempfli S, MacPhee M. Nurses' Workplace Conditions Impacting Their Mental  
57 Health during COVID-19: A Cross-Sectional Survey Study. *Healthcare (Basel)*. 2021;9(1).



1  
2  
3  
4  
5  
6  
7  
8  
9  
10  
11  
12  
13  
14  
15  
16  
17  
18  
19  
20  
21  
22  
23  
24  
25  
26  
27  
28  
29  
30  
31  
32  
33  
34  
35  
36  
37  
38  
39  
40  
41  
42  
43  
44  
45  
46  
47  
48  
49  
50  
51  
52  
53  
54  
55  
56  
57  
58  
59  
60

1 40. Giorgi G, Lecca LI, Alessio F, Finstad GL, Bondanini G, Lulli LG, et al. COVID-19-Related Mental  
2 Health Effects in the Workplace: A Narrative Review. *Int J Environ Res Public Health*. 2020;17(21).  
3 41. Gray-Toft P, Anderson JG. The Nursing Stress Scale: Development of an instrument. *Journal of*  
4 *behavioral assessment*. 1981;3(1):11-23.

5

For peer review only

1  
2  
3 **1 Figure legends**  
4

5 **2 Figure 1.** Flow chart of the study population selection.  
6

7 **3 Figure 2.** Prevalence of depression, anxiety, and stress among healthcare workers in  
8 each severity level according to DASS-21 score.  
9

10 **4 Figure 3.** The median [IQR] norm-based T-score of summary scores and each health  
11 domain scale.  
12

13 **5 Figure 4.** The prevalence of impairment in physical and mental components in  
14 general and each health domain scale among HCWs. PCS, Physical Component  
15 Summary; MCS, Mental Component Summary; PF, Physical-Function; RP,  
16 Role-Physical; BP, Bodily Pain; GH, General Health; VT, Vitality; SF, Social  
17 Functioning; RE, Role-Emotional; MH, Mental Health  
18  
19  
20  
21  
22  
23  
24  
25  
26  
27  
28  
29

30 **13 Supplementary figure legends**  
31

32 **14 Supplementary figure 1.** Prevalence of depression, anxiety, and stress among male  
33 healthcare workers in each severity level according to DASS-21 score.  
34  
35

36 **15 Supplementary figure 2.** Prevalence of depression, anxiety, and stress among female  
37 healthcare workers in each severity level according to DASS-21 score.  
38  
39  
40  
41  
42  
43  
44  
45  
46  
47  
48  
49  
50  
51  
52  
53  
54  
55  
56  
57  
58  
59  
60

**Tables****Table 1.** Cut-off score for mental health status categorization

|            | Normal | Mild    | Moderate | Severe  | Extremely<br>impaired |
|------------|--------|---------|----------|---------|-----------------------|
| Depression | 0 – 9  | 10 – 12 | 13 – 20  | 21 – 27 | 28 – 42               |
| Anxiety    | 0 – 6  | 7 – 9   | 10 – 14  | 15 – 19 | 20 – 42               |
| Stress     | 0 – 10 | 11 – 18 | 19 – 26  | 27 – 34 | 25 – 42               |

**Table 2.** Sociodemographic characteristic of the respondents

| <b>Variables</b>                                             | <b>N = 392</b> |
|--------------------------------------------------------------|----------------|
| <b>Age in years, mean (SD)</b>                               | 33.5 (9.4)     |
| <b>Sex, n (%)</b>                                            |                |
| Male                                                         | 127 (32.4)     |
| Female                                                       | 265 (67.6)     |
| <b>Marital status, n (%)</b>                                 |                |
| Single                                                       | 146 (37.2)     |
| Married                                                      | 128 (32.7)     |
| Married with children                                        | 118 (30.1)     |
| <b>Job, n (%)</b>                                            |                |
| Nurse                                                        | 52 (13.3)      |
| Midwife                                                      | 19 (4.9)       |
| Doctor                                                       | 227 (57.9)     |
| Dentist                                                      | 26 (6.6)       |
| Pharmacist                                                   | 20 (5.1)       |
| Others                                                       | 48 (12.2)      |
| <b>Workplace setting, n (%)</b>                              |                |
| COVID-19 Hospital or COVID-19 referral hospital              | 160 (40.8)     |
| Non-COVID-19 hospital                                        | 76 (19.4)      |
| Primary care facilities                                      | 138 (35.2)     |
| Other healthcare facilities                                  | 18 (4.6)       |
| <b>Workplace island, n (%)</b>                               |                |
| Java Island                                                  | 296 (75.5)     |
| Outside Java Island                                          | 96 (24.5)      |
| <b>Working period during COVID-19 pandemic, n (%)</b>        |                |
| Since the beginning of pandemic (March-April 2020)           | 310 (79.1)     |
| In the middle of pandemic (May 2020 or later)                | 82 (20.9)      |
| <b>Working experience before COVID-19 pandemic, n (%)</b>    |                |
| Not working                                                  | 36 (9.2)       |
| <1 year                                                      | 67 (17.1)      |
| 1-3 years                                                    | 92 (23.5)      |
| >3 years                                                     | 197 (50.2)     |
| <b>Income during COVID-19 pandemic, n (%)</b>                |                |
| <3 million rupiah / month                                    | 77 (19.7)      |
| 3-5 million rupiah / month                                   | 107 (27.3)     |
| 5-10 million rupiah / month                                  | 111 (28.3)     |
| 10-20 million rupiah / month                                 | 51 (13.0)      |
| >20 million rupiah / month                                   | 46 (11.7)      |
| <b>Working hour per week during COVID-19 pandemic, n (%)</b> |                |
| <40 hours / week                                             | 180 (45.9)     |
| 40 – 60 hours / week                                         | 181 (46.2)     |
| >60 hours / week                                             | 31 (7.9)       |
| <b>History of COVID-19 infection, n (%)</b>                  |                |
| Yes                                                          | 57 (14.5)      |
| No                                                           | 335 (85.5)     |
| <b>History of COVID-19 infection in the family, n (%)</b>    |                |
| Yes                                                          | 118 (30.1)     |
| No                                                           | 274 (69.9)     |
| <b>Any family member died because of COVID-19, n (%)</b>     |                |

|    |                                                                                                  |            |
|----|--------------------------------------------------------------------------------------------------|------------|
| 1  |                                                                                                  |            |
| 2  |                                                                                                  |            |
| 3  | Yes                                                                                              | 25 (6.4)   |
| 4  | No                                                                                               | 367 (93.6) |
| 5  | <b>Having one or more comorbidities, n (%)</b>                                                   |            |
| 6  | Yes                                                                                              | 276 (70.4) |
| 7  | No                                                                                               | 116 (29.6) |
| 8  |                                                                                                  |            |
| 9  | <b>PPE availability in the workplace, n (%)</b>                                                  |            |
| 10 | Not available or not according to standard                                                       | 134 (34.2) |
| 11 | Available and according to standard                                                              | 258 (65.8) |
| 12 | <b>Routine free COVID-19 PCR swab test for HCWs, n (%)</b>                                       |            |
| 13 | No                                                                                               | 177 (45.1) |
| 14 | Only if there is any symptoms                                                                    | 194 (49.5) |
| 15 | Routinely 1-3 times a month                                                                      | 20 (5.1)   |
| 16 | At least once a week                                                                             | 1 (0.3)    |
| 17 |                                                                                                  |            |
| 18 | <b>Verbal intimidation in the workplace, n (%)</b>                                               |            |
| 19 | Never                                                                                            | 243 (62.0) |
| 20 | Less than once a month                                                                           | 84 (21.4)  |
| 21 | 1-4 times a month                                                                                | 49 (12.5)  |
| 22 | More than once a week                                                                            | 16 (4.1)   |
| 23 |                                                                                                  |            |
| 24 | <b>Physical intimidation in the workplace, n (%)</b>                                             |            |
| 25 | Never                                                                                            | 379 (96.7) |
| 26 | Less than once a month                                                                           | 8 (2.0)    |
| 27 | 1-4 times a month                                                                                | 3 (0.8)    |
| 28 | More than once a week                                                                            | 2 (0.5)    |
| 29 |                                                                                                  |            |
| 30 | <b>Intimidation from the society outside workplace, n (%)</b>                                    |            |
| 31 | Never                                                                                            | 285 (72.7) |
| 32 | Less than once a month                                                                           | 77 (19.7)  |
| 33 | 1-4 times a month                                                                                | 26 (6.6)   |
| 34 | More than once a week                                                                            | 4 (1.0)    |
| 35 |                                                                                                  |            |
| 36 | <b>Workplace support from intimidation, n (%)</b>                                                |            |
| 37 | Yes                                                                                              | 322 (82.1) |
| 38 | No                                                                                               | 70 (17.9)  |
| 39 |                                                                                                  |            |
| 40 | <b>Has government given sufficient attention to the healthcare sector during COVID-19? n (%)</b> |            |
| 41 | No                                                                                               | 98 (25.0)  |
| 42 | Yes, but not sufficient                                                                          | 273 (69.6) |
| 43 | Yes                                                                                              | 21 (5.4)   |
| 44 |                                                                                                  |            |
| 45 | <b>How workplace treat HCWs with COVID-19 symptoms, n (%)</b>                                    |            |
| 46 | Do not know                                                                                      |            |
| 47 | The HCW is not allowed to come to work until the test result came                                | 21 (5.3)   |
| 48 | out                                                                                              | 306 (78.1) |
| 49 | The HCW still come to work until the test result came out                                        | 65 (16.6)  |
| 50 |                                                                                                  |            |
| 51 | <b>HCWs salary if they are infected with COVID-19, n (%)</b>                                     |            |
| 52 | Do not know                                                                                      | 136 (34.7) |
| 53 | Reduced by the number of the absence                                                             | 67 (17.1)  |
| 54 | Full payment                                                                                     | 189 (48.2) |
| 55 |                                                                                                  |            |
| 56 | <b>Willingness to work during COVID-19 pandemic, n (%)</b>                                       |            |
| 57 | Yes                                                                                              | 330 (84.2) |
| 58 | No                                                                                               | 62 (15.8)  |
| 59 |                                                                                                  |            |
| 60 | <b>Reason for HCWs to work during COVID-19 pandemic, n (%)</b>                                   |            |
|    | Feeling responsible                                                                              | 285 (72.7) |

|    |                                                                             |           |
|----|-----------------------------------------------------------------------------|-----------|
| 1  |                                                                             |           |
| 2  |                                                                             |           |
| 3  | Financial matters                                                           | 88 (22.4) |
| 4  | Already bound to work contract                                              | 36 (9.2)  |
| 5  | <hr/>                                                                       |           |
| 6  | COVID-19, Coronavirus disease 2019; HCWs, healthcare workers; PPE, personal |           |
| 7  | protective equipment.                                                       |           |
| 8  |                                                                             |           |
| 9  |                                                                             |           |
| 10 |                                                                             |           |
| 11 |                                                                             |           |
| 12 |                                                                             |           |
| 13 |                                                                             |           |
| 14 |                                                                             |           |
| 15 |                                                                             |           |
| 16 |                                                                             |           |
| 17 |                                                                             |           |
| 18 |                                                                             |           |
| 19 |                                                                             |           |
| 20 |                                                                             |           |
| 21 |                                                                             |           |
| 22 |                                                                             |           |
| 23 |                                                                             |           |
| 24 |                                                                             |           |
| 25 |                                                                             |           |
| 26 |                                                                             |           |
| 27 |                                                                             |           |
| 28 |                                                                             |           |
| 29 |                                                                             |           |
| 30 |                                                                             |           |
| 31 |                                                                             |           |
| 32 |                                                                             |           |
| 33 |                                                                             |           |
| 34 |                                                                             |           |
| 35 |                                                                             |           |
| 36 |                                                                             |           |
| 37 |                                                                             |           |
| 38 |                                                                             |           |
| 39 |                                                                             |           |
| 40 |                                                                             |           |
| 41 |                                                                             |           |
| 42 |                                                                             |           |
| 43 |                                                                             |           |
| 44 |                                                                             |           |
| 45 |                                                                             |           |
| 46 |                                                                             |           |
| 47 |                                                                             |           |
| 48 |                                                                             |           |
| 49 |                                                                             |           |
| 50 |                                                                             |           |
| 51 |                                                                             |           |
| 52 |                                                                             |           |
| 53 |                                                                             |           |
| 54 |                                                                             |           |
| 55 |                                                                             |           |
| 56 |                                                                             |           |
| 57 |                                                                             |           |
| 58 |                                                                             |           |
| 59 |                                                                             |           |
| 60 |                                                                             |           |

For peer review only

**Table 3.** Determinants for depression in HCWs

| <b>Variables</b>                                                               | <b><i>p</i> value</b> | <b>aOR</b> | <b>95%CI</b>  |
|--------------------------------------------------------------------------------|-----------------------|------------|---------------|
| <b>Sex</b>                                                                     |                       |            |               |
| Male (ref)                                                                     | -                     | -          | -             |
| Female                                                                         | .033                  | 1.777      | 1.048 – 3.013 |
| <b>Working experience before COVID-19 pandemic</b>                             |                       |            |               |
| Not working (ref)                                                              | -                     | -          | -             |
| <1 year                                                                        | .801                  | 0.893      | 0.369 – 2.162 |
| 1-3 years                                                                      | .560                  | 1.283      | 0.554 – 2.969 |
| >3 years                                                                       | .008                  | 0.333      | 0.147 – 0.753 |
| <b>Workplace support from intimidation</b>                                     |                       |            |               |
| Yes (ref)                                                                      | -                     | -          | -             |
| No                                                                             | .002                  | 2.493      | 1.383 – 4.494 |
| <b>Work during COVID-19 pandemic because already bound to working contract</b> |                       |            |               |
| Yes                                                                            | .015                  | 2.578      | 1.198 – 5.547 |
| No (ref)                                                                       | -                     | -          | -             |

*p* value < .05 was considered statistically significant. aOR, adjusted odds ratio; COVID-19, coronavirus disease 2019.

**Table 4.** Determinants for anxiety in HCWs

| <b>Variables</b>                                    | <b><i>p</i> value</b> | <b>aOR</b> | <b>95%CI</b>  |
|-----------------------------------------------------|-----------------------|------------|---------------|
| <b>Age</b>                                          | < .001                | 0.938      | 0.913 – 0.964 |
| <b>Sex</b>                                          |                       |            |               |
| Male (ref)                                          | -                     | -          | -             |
| Female                                              | .010                  | 1.874      | 1.163 – 3.021 |
| <b>Workplace setting</b>                            |                       |            |               |
| COVID-19 Hospital or referral hospital (ref)        | -                     | -          | -             |
| Non-COVID-19 hospital                               | .001                  | 0.356      | 0.189 – 0.669 |
| Primary care or other healthcare facilities         | .029                  | 0.574      | 0.348 – 0.946 |
| <b>Workplace support from intimidation</b>          |                       |            |               |
| Yes (ref)                                           | -                     | -          | -             |
| No                                                  | .017                  | 2.099      | 1.143 – 3.854 |
| <b>Willingness to work during COVID-19 pandemic</b> |                       |            |               |
| Yes (ref)                                           | -                     | -          | -             |
| No                                                  | .016                  | 2.154      | 1.157 – 4.012 |

*p* value < .05 was considered statistically significant. aOR, adjusted odds ratio; COVID-19, coronavirus disease 2019.



**Table 5.** Determinants for stress in HCWs

| <b>Variables</b>                                                               | <b><i>p</i> value</b> | <b>aOR</b> | <b>95%CI</b>   |
|--------------------------------------------------------------------------------|-----------------------|------------|----------------|
| <b>Age</b>                                                                     | .001                  | 0.956      | 0.930 – 0.983  |
| <b>Workplace support from intimidation</b>                                     |                       |            |                |
| Yes (ref)                                                                      | -                     | -          | -              |
| No                                                                             | .014                  | 2.043      | 1.154 – 3.616  |
| <b>Willingness to work during COVID-19 pandemic</b>                            |                       |            |                |
| Yes (ref)                                                                      | -                     | -          | -              |
| No                                                                             | .014                  | 2.169      | 1.168 – 4.027  |
| <b>Work during COVID-19 pandemic because of financial matters</b>              |                       |            |                |
| Yes                                                                            | .014                  | 3.575      | 1.293 – 9.885  |
| No (ref)                                                                       | -                     | -          | -              |
| <b>Work during COVID-19 pandemic because already bound to working contract</b> |                       |            |                |
| Yes                                                                            | .014                  | 4.352      | 1.340 – 14.137 |
| No (ref)                                                                       | -                     | -          | -              |

*p* value < .05 was considered statistically significant. aOR, adjusted odds ratio; COVID-19, coronavirus disease 2019.

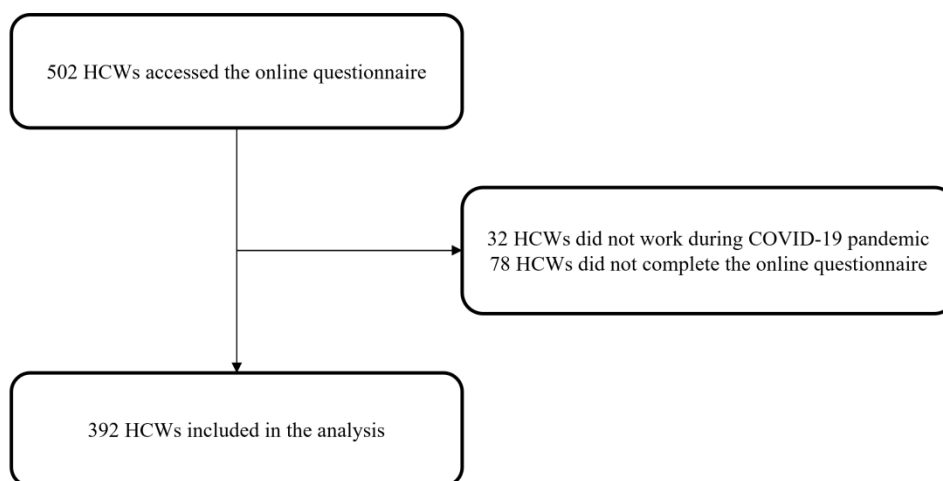

Figure 1

512x270mm (130 x 130 DPI)

1  
2  
3  
4  
5  
6  
7  
8  
9  
10  
11  
12  
13  
14  
15  
16  
17  
18  
19  
20  
21  
22  
23  
24  
25  
26  
27  
28  
29  
30  
31  
32  
33  
34  
35  
36  
37  
38  
39  
40  
41  
42  
43  
44  
45  
46  
47  
48  
49  
50  
51  
52  
53  
54  
55  
56  
57  
58  
59  
60

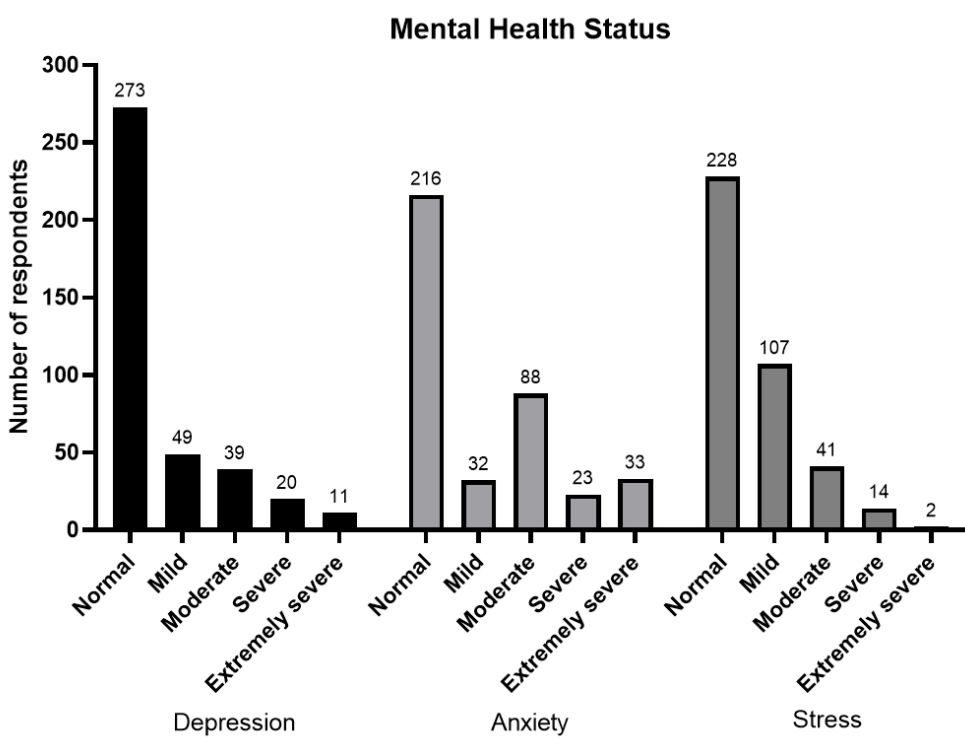

Figure 2

437x334mm (59 x 59 DPI)

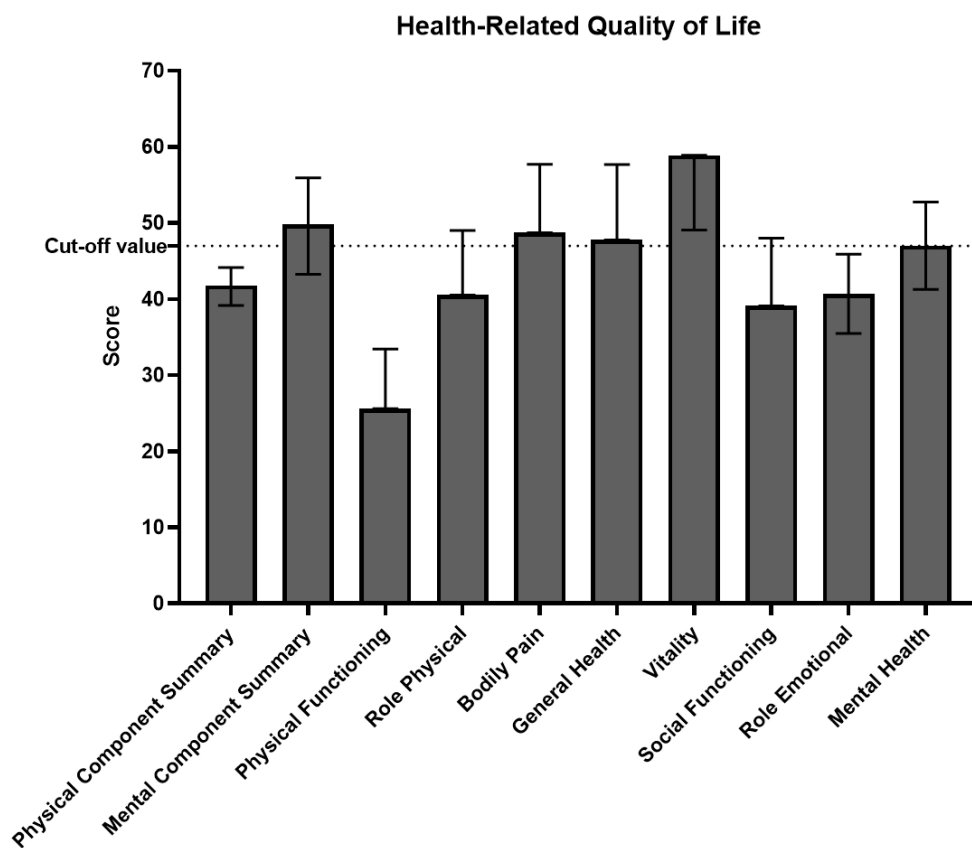

Figure 3

476x418mm (59 x 59 DPI)

1  
2  
3  
4  
5  
6  
7  
8  
9  
10  
11  
12  
13  
14  
15  
16  
17  
18  
19  
20  
21  
22  
23  
24  
25  
26  
27  
28  
29  
30  
31  
32  
33  
34  
35  
36  
37  
38  
39  
40  
41  
42  
43  
44  
45  
46  
47  
48  
49  
50  
51  
52  
53  
54  
55  
56  
57  
58  
59  
60

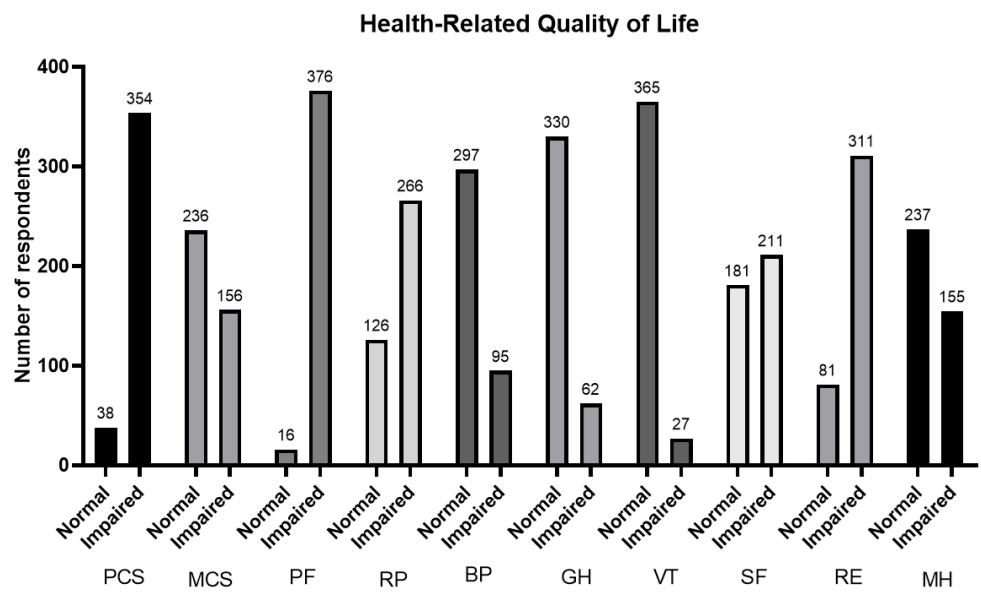

Figure 4

510x315mm (59 x 59 DPI)

1  
2  
3  
4  
5  
6  
7  
8  
9  
10  
11  
12  
13  
14  
15  
16  
17  
18  
19  
20  
21  
22  
23  
24  
25  
26  
27  
28  
29  
30  
31  
32  
33  
34  
35  
36  
37  
38  
39  
40  
41  
42  
43  
44  
45  
46  
47  
48  
49  
50  
51  
52  
53  
54  
55  
56  
57  
58  
59  
60

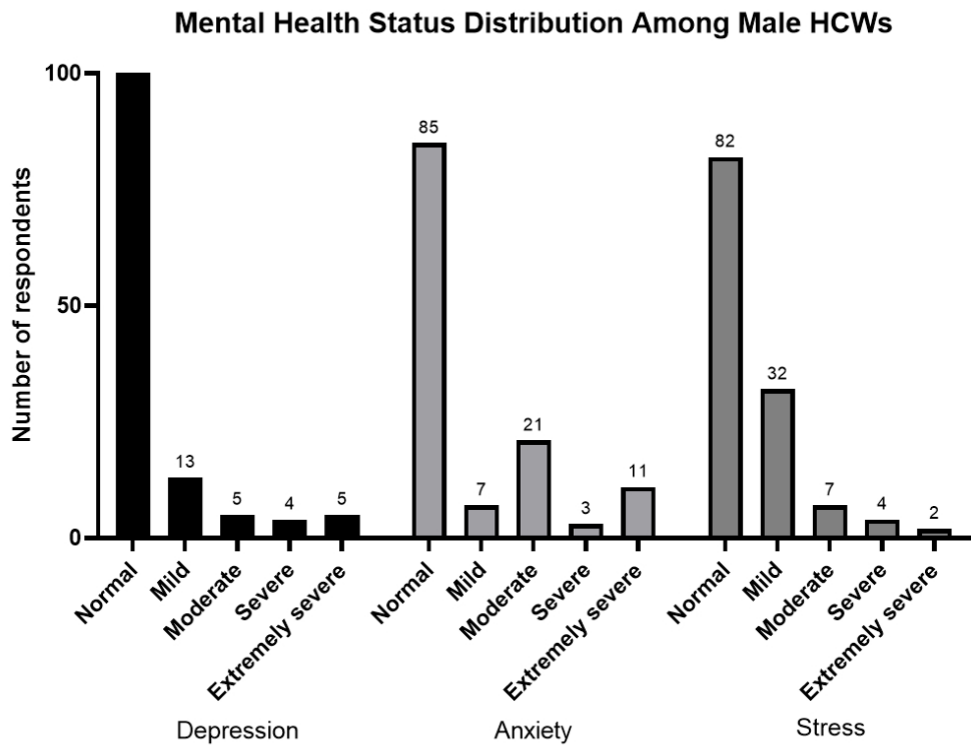

437x341mm (59 x 59 DPI)

1  
2  
3  
4  
5  
6  
7  
8  
9  
10  
11  
12  
13  
14  
15  
16  
17  
18  
19  
20  
21  
22  
23  
24  
25  
26  
27  
28  
29  
30  
31  
32  
33  
34  
35  
36  
37  
38  
39  
40  
41  
42  
43  
44  
45  
46  
47  
48  
49  
50  
51  
52  
53  
54  
55  
56  
57  
58  
59  
60

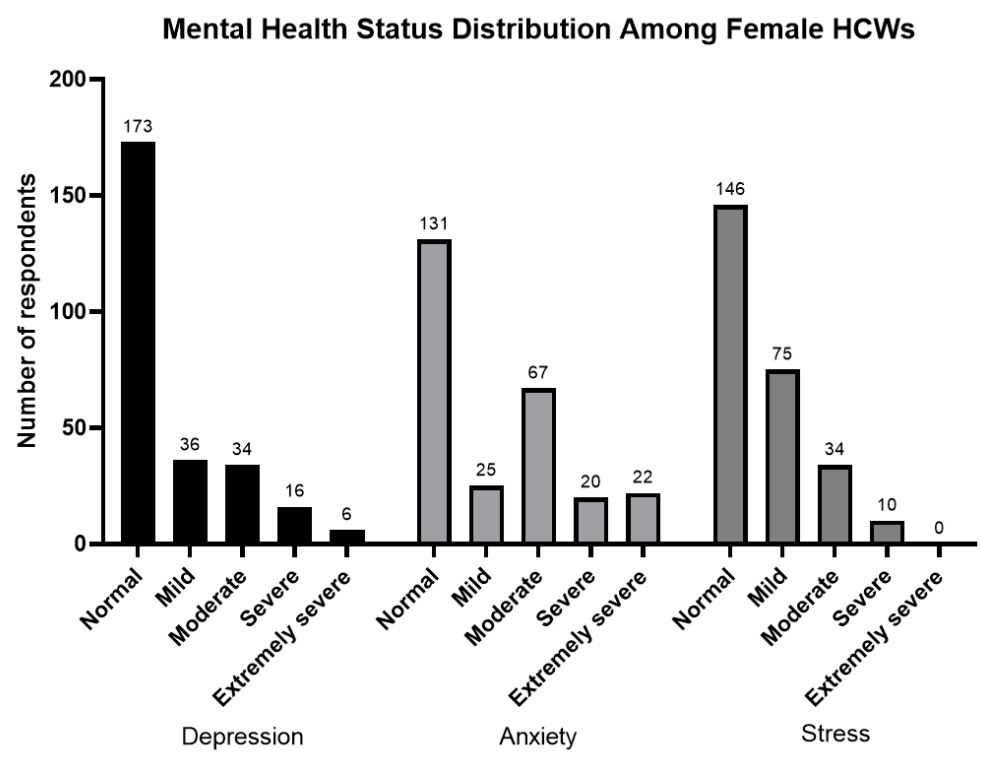

437x341mm (59 x 59 DPI)

**Supplementary Table 1.** Univariate analysis of determinants for depression among HCWs

| <b>Variables</b>                                      | <b>p value</b>   | <b>COR</b> | <b>95%CI</b>  |
|-------------------------------------------------------|------------------|------------|---------------|
| <b>Age</b>                                            | <b>.018</b>      | 0.941      | 0.913 – 0.969 |
| <b>Sex</b>                                            |                  |            |               |
| Male (ref)                                            | -                | -          | -             |
| Female                                                | <b>.007</b>      | 1.970      | 1.201 – 3.230 |
| <b>Marital status</b>                                 |                  |            |               |
| Single (ref)                                          | -                | -          | -             |
| Married                                               | <b>.013</b>      | 0.524      | 0.315 – 0.873 |
| Married with children                                 | <b>&lt; .001</b> | 0.337      | 0.192 – 0.592 |
| <b>Job</b>                                            |                  |            |               |
| Doctor (ref)                                          | -                | -          | -             |
| Nurse                                                 | .262             | 0.676      | 0.340 – 1.341 |
| Midwife                                               | .133             | 0.380      | 0.107 – 1.345 |
| Dentist                                               | .872             | 1.073      | 0.457 – 2.520 |
| Pharmacist                                            | .464             | 0.676      | 0.237 – 1.929 |
| Others                                                | .603             | 0.835      | 0.422 – 1.649 |
| <b>Workplace setting</b>                              |                  |            |               |
| COVID-19 Hospital or referral hospital (ref)          | -                | -          | -             |
| Non-COVID-19 hospital                                 | .156             | 0.645      | 0.353 – 1.181 |
| Primary care or other healthcare facilities           | .096             | 0.666      | 0.412 – 1.075 |
| <b>Residence island</b>                               |                  |            |               |
| Java Island (ref)                                     | -                | -          | -             |
| Outside Java Island                                   | .118             | 0.656      | 0.387 – 1.113 |
| <b>Working period during COVID-19 pandemic</b>        |                  |            |               |
| Since the beginning of pandemic (ref)                 | -                | -          | -             |
| In the middle of pandemic                             | .268             | 1.338      | 0.799 – 2.238 |
| <b>Working experience before COVID-19 pandemic</b>    |                  |            |               |
| Not working (ref)                                     | -                | -          | -             |
| <1 year                                               | .666             | 0.833      | 0.364 – 1.906 |
| 1-3 years                                             | .604             | 1.229      | 0.564 – 2.677 |
| >3 years                                              | .003             | 0.313      | 0.147 – 0.666 |
| <b>Income during COVID-19 pandemic</b>                |                  |            |               |
| <3 million rupiah / month (ref)                       | -                | -          | -             |
| 3-5 million rupiah / month                            | .322             | 1.377      | 0.731 – 2.594 |
| 5-10 million rupiah / month                           | .413             | 1.301      | 0.692 – 2.446 |
| 10-20 million rupiah / month                          | .918             | 1.042      | 0.478 – 2.271 |
| >20 million rupiah / month                            | .052             | 0.375      | 0.139 – 1.010 |
| <b>Working hour per week during COVID-19 pandemic</b> |                  |            |               |
| <40 hours / week (ref)                                | -                | -          | -             |
| 40 – 60 hours / week                                  | .114             | 1.444      | 0.916 – 2.279 |



|                                                                                    |                  |       |               |
|------------------------------------------------------------------------------------|------------------|-------|---------------|
| >60 hours per week                                                                 | .064             | 2.104 | 0.957 – 4.627 |
| <b>History of COVID-19 infection</b>                                               |                  |       |               |
| Yes                                                                                | .925             | 0.971 | 0.526 – 1.793 |
| No (ref)                                                                           | -                | -     | -             |
| <b>History of COVID-19 infection in the family</b>                                 |                  |       |               |
| Yes                                                                                | .447             | 1.197 | 0.753 – 1.903 |
| No (ref)                                                                           | -                | -     | -             |
| <b>Any family member died because of COVID-19</b>                                  |                  |       |               |
| Yes                                                                                | .130             | 1.884 | 0.829 – 4.282 |
| No (ref)                                                                           | -                | -     | -             |
| <b>Having one or more comorbidities</b>                                            |                  |       |               |
| Yes                                                                                | .363             | 1.241 | 0.780 – 1.975 |
| No (ref)                                                                           | -                | -     | -             |
| <b>PPE availability in the workplace</b>                                           |                  |       |               |
| Not available or not according to standard (ref)                                   | -                | -     | -             |
| Available and according to standard                                                | <b>.032</b>      | 0.613 | 0.393 – 0.958 |
| <b>Verbal intimidation in the workplace</b>                                        |                  |       |               |
| Never (ref)                                                                        | -                | -     | -             |
| At least once                                                                      | <b>.001</b>      | 2.102 | 1.355 – 3.263 |
| <b>Physical intimidation in the workplace</b>                                      |                  |       |               |
| Never (ref)                                                                        | -                | -     | -             |
| At least once                                                                      | .974             | 1.020 | 0.308 – 3.381 |
| <b>Intimidation from the society outside workplace</b>                             |                  |       |               |
| Never (ref)                                                                        | -                | -     | -             |
| At least once                                                                      | <b>.005</b>      | 1.956 | 1.226 – 3.119 |
| <b>Workplace support from intimidation</b>                                         |                  |       |               |
| Yes (ref)                                                                          | -                | -     | -             |
| No                                                                                 | <b>.013</b>      | 1.963 | 1.153 – 3.345 |
| <b>Willingness to work during COVID-19 pandemic</b>                                |                  |       |               |
| Yes                                                                                | -                | -     | -             |
| No (ref)                                                                           | <b>.003</b>      | 2.343 | 1.346 – 4.080 |
| <b>Reason for HCW to work during COVID-19 pandemic because feeling responsible</b> |                  |       |               |
| Yes                                                                                | <b>&lt; .001</b> | 0.364 | 0.228 – 0.581 |
| No (ref)                                                                           | -                | -     | -             |
| <b>Reason to work during COVID-19 pandemic because of financial matters</b>        |                  |       |               |
| Yes                                                                                | .099             | 1.521 | 0.924 – 2.504 |
| No (ref)                                                                           | -                | -     | -             |
| <b>Reason to work during COVID-19</b>                                              |                  |       |               |

|                                                           |             |       |               |
|-----------------------------------------------------------|-------------|-------|---------------|
| <b>pandemic because already bound to working contract</b> |             |       |               |
| Yes                                                       | <b>.001</b> | 3.245 | 1.616 – 6.515 |
| No (ref)                                                  | -           | -     | -             |

For peer review only

**Supplementary Table 2.** Univariate analysis of determinants for anxiety among HCWs

| <b>Variables</b>                                         | <b>p value</b>   | <b>COR</b> | <b>95%CI</b>  |
|----------------------------------------------------------|------------------|------------|---------------|
| <b>Age</b>                                               | <b>&lt; .001</b> | 0.942      | 0.919 – 0.966 |
| <b>Sex</b>                                               |                  |            |               |
| Male (ref)                                               | -                | -          | -             |
| Female                                                   | <b>.001</b>      | 2.070      | 1.332 – 3.218 |
| <b>Marital status</b>                                    |                  |            |               |
| Single (ref)                                             | -                | -          | -             |
| Married                                                  | <b>.003</b>      | 0.484      | 0.298 – 0.785 |
| Married with children                                    | <b>.004</b>      | 0.481      | 0.293 – 0.789 |
| <b>Job</b>                                               |                  |            |               |
| Doctor (ref)                                             | -                | -          | -             |
| Nurse                                                    | .092             | 0.583      | 0.311 – 1.039 |
| Midwife                                                  | .186             | 0.509      | 0.187 – 1.385 |
| Dentist                                                  | .545             | 1.285      | 0.570 – 2.901 |
| Pharmacist                                               | .516             | 0.735      | 0.289 – 1.865 |
| Others                                                   | .826             | 0.932      | 0.499 – 1.741 |
| <b>Workplace setting</b>                                 |                  |            |               |
| COVID-19 Hospital or referral hospital (ref)             | -                | -          | -             |
| Non-COVID-19 hospital                                    | <b>.024</b>      | 0.524      | 0.299 – 0.920 |
| Primary care or other healthcare facilities              | .140             | 0.716      | 0.460 – 1.116 |
| <b>Residence island</b>                                  |                  |            |               |
| Java Island (ref)                                        | -                | -          | -             |
| Outside Java Island                                      | .464             | 0.840      | 0.527 – 1.339 |
| <b>Working period during COVID-19 pandemic</b>           |                  |            |               |
| Since the beginning of pandemic (March-April 2020) (ref) | -                | -          | -             |
| In the middle of pandemic (April 2020 or later)          | .197             | 1.379      | 0.847 – 2.246 |
| <b>Working experience before COVID-19 pandemic</b>       |                  |            |               |
| Not working (ref)                                        | -                | -          | -             |
| <1 year                                                  | .147             | 0.545      | 0.240 – 1.238 |
| 1-3 years                                                | .792             | 1.111      | 0.507 – 2.433 |
| >3 years                                                 | <b>.012</b>      | 0.394      | 0.191 – 0.812 |
| <b>Income during COVID-19 pandemic</b>                   |                  |            |               |
| <3 million rupiah / month (ref)                          | -                | -          | -             |
| 3-5 million rupiah / month                               | .674             | 1.135      | 0.631 – 2.041 |
| 5-10 million rupiah / month                              | .851             | 1.058      | 0.590 – 1.895 |
| 10-20 million rupiah / month                             | .633             | 0.840      | 0.411 – 1.718 |
| >20 million rupiah / month                               | .246             | 0.640      | 0.301 – 1.361 |
| <b>Working hour per week during COVID-19 pandemic</b>    |                  |            |               |

|                                                                                    |                  |       |               |
|------------------------------------------------------------------------------------|------------------|-------|---------------|
| <40 hours / week (ref)                                                             | -                | -     | -             |
| 40 – 60 hours / week                                                               | .263             | 1.268 | 0.836 – 1.923 |
| >60 hours per week                                                                 | .157             | 1.739 | 0.808 – 3.746 |
| <b>History of COVID-19 infection</b>                                               |                  |       |               |
| Yes                                                                                | .206             | 1.438 | 0.819 – 2.526 |
| No (ref)                                                                           | -                | -     | -             |
| <b>History of COVID-19 infection in the family</b>                                 |                  |       |               |
| Yes                                                                                | .996             | 1.001 | 0.649 – 1.545 |
| No (ref)                                                                           | -                | -     | -             |
| <b>Any family member died because of COVID-19</b>                                  |                  |       |               |
| Yes                                                                                | .462             | 1.356 | 0.602 – 3.051 |
| No (ref)                                                                           | -                | -     | -             |
| <b>Having one or more comorbidities</b>                                            |                  |       |               |
| Yes                                                                                | .670             | 1.099 | 0.711 – 1.699 |
| No (ref)                                                                           | -                | -     | -             |
| <b>PPE availability in the workplace</b>                                           |                  |       |               |
| Not available or not according to standard (ref)                                   | -                | -     | -             |
| Available and according to standard                                                | <b>.036</b>      | 0.638 | 0.419 – 0.970 |
| <b>Verbal intimidation in the workplace</b>                                        |                  |       |               |
| Never (ref)                                                                        | -                | -     | -             |
| At least once                                                                      | <b>.002</b>      | 1.940 | 1.283 – 2.933 |
| <b>Physical intimidation in the workplace</b>                                      |                  |       |               |
| Never (ref)                                                                        | -                | -     | -             |
| At least once                                                                      | .926             | 1.054 | 0.348 – 3.195 |
| <b>Intimidation from the society outside workplace</b>                             |                  |       |               |
| Never (ref)                                                                        | -                | -     | -             |
| At least once                                                                      | <b>.024</b>      | 1.675 | 1.071 – 2.620 |
| <b>Workplace support from intimidation</b>                                         |                  |       |               |
| Yes (ref)                                                                          | -                | -     | -             |
| No                                                                                 | <b>.003</b>      | 2.263 | 1.332 – 3.845 |
| <b>Willingness to work during COVID-19 pandemic</b>                                |                  |       |               |
| Yes                                                                                | -                | -     | -             |
| No (ref)                                                                           | <b>&lt; .001</b> | 2.820 | 1.55 – 4.986  |
| <b>Reason for HCW to work during COVID-19 pandemic because feeling responsible</b> |                  |       |               |
| Yes                                                                                | <b>.001</b>      | 0.459 | 0.292 – 0.721 |
| No (ref)                                                                           | -                | -     | -             |
| <b>work during COVID-19 pandemic because of financial matters</b>                  |                  |       |               |
| Yes                                                                                | <b>.040</b>      | 1.650 | 1.024 – 2.660 |

1  
2  
3  
4  
5  
6  
7  
8  
9  
10  
11  
12  
13  
14  
15  
16  
17  
18  
19  
20  
21  
22  
23  
24  
25  
26  
27  
28  
29  
30  
31  
32  
33  
34  
35  
36  
37  
38  
39  
40  
41  
42  
43  
44  
45  
46  
47  
48  
49  
50  
51  
52  
53  
54  
55  
56  
57  
58  
59  
60

|                                                                                |      |       |               |
|--------------------------------------------------------------------------------|------|-------|---------------|
| No (ref)                                                                       | -    | -     | -             |
| <b>work during COVID-19 pandemic because already bound to working contract</b> |      |       |               |
| Yes                                                                            | .093 | 1.815 | 1.906 – 3.637 |
| No (ref)                                                                       | -    | -     | -             |

For peer review only

**Supplementary Table 3.** Univariate analysis of determinants for stress among HCWs

| <b>Variables</b>                                         | <b>p value</b>   | <b>COR</b> | <b>95%CI</b>  |
|----------------------------------------------------------|------------------|------------|---------------|
| <b>Age</b>                                               | <b>&lt; .001</b> | 0.955      | 0.932 – 0.978 |
| <b>Sex</b>                                               |                  |            |               |
| Male (ref)                                               | -                | -          | -             |
| Female                                                   | .076             | 1.485      | 0.960 – 2.299 |
| <b>Marital status</b>                                    |                  |            |               |
| Single (ref)                                             | -                | -          | -             |
| Married                                                  | <b>.020</b>      | 0.561      | 0.345 – 0.911 |
| Married with children                                    | .055             | 0.616      | 0.376 – 1.009 |
| <b>Job</b>                                               |                  |            |               |
| Doctor (ref)                                             | -                | -          | -             |
| Nurse                                                    | .311             | 0.722      | 0.385 – 1.355 |
| Midwife                                                  | .644             | 0.796      | 0.302 – 2.097 |
| Dentist                                                  | .706             | 1.170      | 0.518 – 2.642 |
| Pharmacist                                               | .506             | 1.365      | 0.546 – 3.408 |
| Others                                                   | .853             | 1.061      | 0.566 – 1.989 |
| <b>Workplace setting</b>                                 |                  |            |               |
| COVID-19 Hospital or referral hospital (ref)             | -                | -          | -             |
| Non-COVID-19 hospital                                    | .321             | 0.754      | 0.432 – 1.317 |
| Primary care or other healthcare facilities              | .407             | 0.828      | 0.530 – 1.294 |
| <b>Residence island</b>                                  |                  |            |               |
| Java Island (ref)                                        | -                | -          | -             |
| Outside Java Island                                      | .607             | 0.884      | 0.553 – 1.414 |
| <b>Working period during COVID-19 pandemic</b>           |                  |            |               |
| Since the beginning of pandemic (March-April 2020) (ref) | -                | -          | -             |
| In the middle of pandemic (April 2020 or later)          | .742             | 0.920      | 0.561 – 1.511 |
| <b>Working experience before COVID-19 pandemic</b>       |                  |            |               |
| Not working (ref)                                        | -                | -          | -             |
| <1 year                                                  | .261             | 0.624      | 0.274 – 1.421 |
| 1-3 years                                                | .403             | 1.390      | 0.642 – 3.011 |
| >3 years                                                 | .228             | 0.644      | 0.315 – 1.317 |
| <b>Income during COVID-19 pandemic</b>                   |                  |            |               |
| <3 million rupiah / month (ref)                          | -                | -          | -             |
| 3-5 million rupiah / month                               | .100             | 1.655      | 0.909 – 3.013 |
| 5-10 million rupiah / month                              | .236             | 1.434      | 0.790 – 2.604 |
| 10-20 million rupiah / month                             | .584             | 1.225      | 0.593 – 2.531 |
| >20 million rupiah / month                               | .357             | 0.89       | 0.312 – 1.522 |
| <b>Working hour per week during COVID-19 pandemic</b>    |                  |            |               |

|                                                                                    |                  |       |               |
|------------------------------------------------------------------------------------|------------------|-------|---------------|
| <40 hours / week (ref)                                                             | -                | -     | -             |
| 40 – 60 hours / week                                                               | .359             | 1.217 | 0.800 – 1.852 |
| >60 hours per week                                                                 | .321             | 1.473 | 0.685 – 3.168 |
| <b>History of COVID-19 infection</b>                                               |                  |       |               |
| Yes                                                                                | .532             | 1.197 | 0.681 – 2.106 |
| No (ref)                                                                           | -                | -     | -             |
| <b>History of COVID-19 infection in the family</b>                                 |                  |       |               |
| Yes                                                                                | .935             | 0.982 | 0.634 – 1.521 |
| No (ref)                                                                           | -                | -     | -             |
| <b>Any family member died because of COVID-19</b>                                  |                  |       |               |
| Yes                                                                                | .143             | 1.841 | 0.814 – 4.167 |
| No (ref)                                                                           | -                | -     | -             |
| <b>Having one or more comorbidities</b>                                            |                  |       |               |
| Yes                                                                                | .437             | 1.190 | 0.768 – 1.843 |
| No (ref)                                                                           | -                | -     | -             |
| <b>PPE availability in the workplace</b>                                           |                  |       |               |
| Not available or not according to standard (ref)                                   | -                | -     | -             |
| Available and according to standard                                                | <b>.019</b>      | 0.602 | 0.395 – 0.919 |
| <b>Verbal intimidation in the workplace</b>                                        |                  |       |               |
| Never (ref)                                                                        | -                | -     | -             |
| At least once                                                                      | <b>.025</b>      | 1.604 | 1.061 – 2.425 |
| <b>Physical intimidation in the workplace</b>                                      |                  |       |               |
| Never (ref)                                                                        | -                | -     | -             |
| At least once                                                                      | .377             | 1.650 | 0.544 – 5.003 |
| <b>Intimidation from the society outside workplace</b>                             |                  |       |               |
| Never (ref)                                                                        | -                | -     | -             |
| At least once                                                                      | <b>.019</b>      | 1.708 | 1.091 – 2.673 |
| <b>Workplace support from intimidation</b>                                         |                  |       |               |
| Yes (ref)                                                                          | -                | -     | -             |
| No                                                                                 | <b>.005</b>      | 2.129 | 1.261 – 3.595 |
| <b>Willingness to work during COVID-19 pandemic</b>                                |                  |       |               |
| Yes                                                                                | -                | -     | -             |
| No (ref)                                                                           | <b>&lt; .001</b> | 2.781 | 1.586 – 4.874 |
| <b>Reason for HCW to work during COVID-19 pandemic because feeling responsible</b> |                  |       |               |
| Yes                                                                                | <b>&lt; .001</b> | 0.427 | 0.271 – 0.671 |
| No (ref)                                                                           | -                | -     | -             |
| <b>work during COVID-19 pandemic because of financial matters</b>                  |                  |       |               |
| Yes                                                                                | <b>.001</b>      | 2.193 | 1.355 – 3.549 |

|                                                                                |             |       |               |
|--------------------------------------------------------------------------------|-------------|-------|---------------|
| No (ref)                                                                       | -           | -     | -             |
| <b>work during COVID-19 pandemic because already bound to working contract</b> |             |       |               |
| Yes                                                                            | <b>.006</b> | 2.698 | 1.323 – 5.501 |
| No (ref)                                                                       | -           | -     | -             |

For peer review only



**Supplementary Table 4.** Univariate analysis of determinants for impaired physical health component among HCWs

| <b>Variables</b>                                         | <b>p value</b> | <b>COR</b> | <b>95%CI</b>   |
|----------------------------------------------------------|----------------|------------|----------------|
| <b>Age</b>                                               | .134           | 1.033      | 0.990 – 1.079  |
| <b>Sex</b>                                               |                |            |                |
| Male (ref)                                               | -              | -          | -              |
| Female                                                   | .633           | 0.836      | 0.401 – 1.744  |
| <b>Marital status</b>                                    |                |            |                |
| Single (ref)                                             | -              | -          | -              |
| Married                                                  | .318           | 1.496      | 0.878 – 3.299  |
| Married with children                                    | .214           | 1.703      | 0.735 – 3.945  |
| <b>Job</b>                                               |                |            |                |
| Doctor (ref)                                             | -              | -          | -              |
| Nurse                                                    | .310           | 0.621      | 0.248 – 1.557  |
| Midwife                                                  | .802           | 0.821      | 0.177 – 3.813  |
| Dentist                                                  | .285           | 0.531      | 0.167 – 1.695  |
| Pharmacist                                               | .564           | 1.836      | 0.233 – 14.441 |
| Others                                                   | .915           | 1.063      | 0.346 – 3.263  |
| <b>Workplace setting</b>                                 |                |            |                |
| COVID-19 Hospital or referral hospital (ref)             | -              | -          | -              |
| Non-COVID-19 hospital                                    | .298           | 0.633      | 0.267 – 1.499  |
| Primary care or other healthcare facilities              | .944           | 0.973      | 0.448 – 2.113  |
| <b>Residence island</b>                                  |                |            |                |
| Java Island (ref)                                        | -              | -          | -              |
| Outside Java Island                                      | .095           | 2.284      | 0.865 – 6.026  |
| <b>Working period during COVID-19 pandemic</b>           |                |            |                |
| Since the beginning of pandemic (March-April 2020) (ref) | -              | -          | -              |
| In the middle of pandemic (April 2020 or later)          | .659           | 0.837      | 0.380 – 1.846  |
| <b>Working experience before COVID-19 pandemic</b>       |                |            |                |
| Not working (ref)                                        | -              | -          | -              |
| <1 year                                                  | .090           | 0.163      | 0.020 – 1.328  |
| 1-3 years                                                | .143           | 0.210      | 0.026 – 1.693  |
| >3 years                                                 | .281           | 0.323      | 0.042 – 2.517  |
| <b>Income during COVID-19 pandemic</b>                   |                |            |                |
| <3 million rupiah / month (ref)                          | -              | -          | -              |
| 3-5 million rupiah / month                               | .555           | 1.423      | 0.441 – 4.591  |
| 5-10 million rupiah / month                              | .052           | 0.385      | 0.147 – 1.008  |
| 10-20 million rupiah / month                             | .680           | 1.352      | 0.322 – 5.670  |
| >20 million rupiah / month                               | .794           | 1.211      | 0.288 – 5.096  |
| <b>Working hour per week during COVID-</b>               |                |            |                |

|                                                                                    |      |       |                |
|------------------------------------------------------------------------------------|------|-------|----------------|
| <b>19 pandemic</b>                                                                 |      |       |                |
| <40 hours / week (ref)                                                             | -    | -     | -              |
| 40 – 60 hours / week                                                               | .706 | 1.146 | 0.565 – 2.325  |
| >60 hours per week                                                                 | .626 | 0.750 | 0.236 – 2.386  |
| <b>History of COVID-19 infection</b>                                               |      |       |                |
| Yes                                                                                | .818 | 0.898 | 0.357 – 2.255  |
| No (ref)                                                                           | -    | -     | -              |
| <b>History of COVID-19 infection in the family</b>                                 |      |       |                |
| Yes                                                                                | .342 | 0.713 | 0.35 – 1.433   |
| No (ref)                                                                           | -    | -     | -              |
| <b>Any family member died because of COVID-19</b>                                  |      |       |                |
| Yes                                                                                | .278 | 0.536 | 0.174 – 1.653  |
| No (ref)                                                                           | -    | -     | -              |
| <b>Having one or more comorbidities</b>                                            |      |       |                |
| Yes                                                                                | .778 | 0.901 | 0.438 – 1.854  |
| No (ref)                                                                           | -    | -     | -              |
| <b>PPE availability in the workplace</b>                                           |      |       |                |
| Not available or not according to standard (ref)                                   | -    | -     | -              |
| Available and according to standard                                                | .285 | 0.662 | 0.312 – 1.408  |
| <b>Verbal intimidation in the workplace</b>                                        |      |       |                |
| Never (ref)                                                                        | -    | -     | -              |
| At least once                                                                      | .876 | 1.057 | 0.528 – 2.113  |
| <b>Physical intimidation in the workplace</b>                                      |      |       |                |
| Never (ref)                                                                        | -    | -     | -              |
| At least once                                                                      | .805 | 1.298 | 0.164 – 10.268 |
| <b>Intimidation from the society outside workplace</b>                             |      |       |                |
| Never (ref)                                                                        | -    | -     | -              |
| At least once                                                                      | .366 | 1.456 | 0.645 – 3.285  |
| <b>Workplace support from intimidation</b>                                         |      |       |                |
| Yes (ref)                                                                          | -    | -     | -              |
| No                                                                                 | .589 | 0.796 | 0.348 – 1.820  |
| <b>Willingness to work during COVID-19 pandemic</b>                                |      |       |                |
| Yes                                                                                | -    | -     | -              |
| No (ref)                                                                           | .996 | 1.002 | 0.400 – 2.509  |
| <b>Reason for HCW to work during COVID-19 pandemic because feeling responsible</b> |      |       |                |
| Yes                                                                                | .080 | 1.857 | 0.929 – 3.712  |
| No (ref)                                                                           | -    | -     | -              |
| <b>work during COVID-19 pandemic because of financial matters</b>                  |      |       |                |

1  
2  
3  
4  
5  
6  
7  
8  
9  
10  
11  
12  
13  
14  
15  
16  
17  
18  
19  
20  
21  
22  
23  
24  
25  
26  
27  
28  
29  
30  
31  
32  
33  
34  
35  
36  
37  
38  
39  
40  
41  
42  
43  
44  
45  
46  
47  
48  
49  
50  
51  
52  
53  
54  
55  
56  
57  
58  
59  
60

|                                                                                |      |       |               |
|--------------------------------------------------------------------------------|------|-------|---------------|
| Yes                                                                            | .071 | 0.517 | 0.252 – 1.059 |
| No (ref)                                                                       | -    | -     | -             |
| <b>work during COVID-19 pandemic because already bound to working contract</b> |      |       |               |
| Yes                                                                            | .722 | 1.199 | 0.350 – 4.113 |
| No (ref)                                                                       | -    | -     | -             |

For peer review only

**Supplementary Table 5.** Univariate analysis of determinants for impaired mental health component among HCWs

| <b>Variables</b>                                         | <b>p value</b> | <b>COR</b> | <b>95%CI</b>  |
|----------------------------------------------------------|----------------|------------|---------------|
| <b>Age</b>                                               | .973           | 1.000      | 0.978 – 1.021 |
| <b>Sex</b>                                               |                |            |               |
| Male (ref)                                               | -              | -          | -             |
| Female                                                   | .748           | 0.932      | 0.605 – 1.434 |
| <b>Marital status</b>                                    |                |            |               |
| Single (ref)                                             | -              | -          | -             |
| Married                                                  | .266           | 1.319      | 0.810 – 2.148 |
| Married with children                                    | .263           | 1.329      | 0.808 – 2.187 |
| <b>Job</b>                                               |                |            |               |
| Doctor (ref)                                             | -              | -          | -             |
| Nurse                                                    | .057           | 1.804      | 0.983 – 3.310 |
| Midwife                                                  | .958           | 0.975      | 0.369 – 2.571 |
| Dentist                                                  | .777           | 0.884      | 0.377 – 2.072 |
| Pharmacist                                               | .273           | 1.671      | 0.668 – 4.179 |
| Others                                                   | .994           | 1.002      | 0.527 – 1.907 |
| <b>Workplace setting</b>                                 |                |            |               |
| COVID-19 Hospital or referral hospital (ref)             | -              | -          | -             |
| Non-COVID-19 hospital                                    | .752           | 1.093      | 0.629 – 1.898 |
| Primary care or other healthcare facilities              | .391           | 0.820      | 0.521 – 1.290 |
| <b>Residence island</b>                                  |                |            |               |
| Java Island (ref)                                        | -              | -          | -             |
| Outside Java Island                                      | .961           | 0.988      | 0.617 – 1.582 |
| <b>Working period during COVID-19 pandemic</b>           |                |            |               |
| Since the beginning of pandemic (March-April 2020) (ref) | -              | -          | -             |
| In the middle of pandemic (April 2020 or later)          | .729           | 1.092      | 0.665 – 1.790 |
| <b>Working experience before COVID-19 pandemic</b>       |                |            |               |
| Not working (ref)                                        | -              | -          | -             |
| <1 year                                                  | .252           | 1.619      | 0.710 – 3.689 |
| 1-3 years                                                | .502           | 0.760      | 0.342 – 1.691 |
| >3 years                                                 | .937           | 1.030      | 0.497 – 2.134 |
| <b>Income during COVID-19 pandemic</b>                   |                |            |               |
| <3 million rupiah / month (ref)                          | -              | -          | -             |
| 3-5 million rupiah / month                               | .187           | 1.510      | 0.818 – 2.785 |
| 5-10 million rupiah / month                              | .050           | 1.833      | 1.001 – 3.358 |
| 10-20 million rupiah / month                             | .919           | 1.040      | 0.490 – 2.208 |
| >20 million rupiah / month                               | .612           | 1.219      | 0.567 – 2.622 |
| <b>Working hour per week during COVID-</b>               |                |            |               |

|                                                                                    |      |       |               |
|------------------------------------------------------------------------------------|------|-------|---------------|
| <b>19 pandemic</b>                                                                 |      |       |               |
| <40 hours / week (ref)                                                             | -    | -     | -             |
| 40 – 60 hours / week                                                               | .177 | 1.338 | 0.877 – 2.040 |
| >60 hours per week                                                                 | .899 | 0.950 | 0.429 – 2.105 |
| <b>History of COVID-19 infection</b>                                               |      |       |               |
| Yes                                                                                | .841 | 0.943 | 0.430 – 1.678 |
| No (ref)                                                                           | -    | -     | -             |
| <b>History of COVID-19 infection in the family</b>                                 |      |       |               |
| Yes                                                                                | .829 | 0.953 | 0.612 – 1.482 |
| No (ref)                                                                           | -    | -     | -             |
| <b>Any family member died because of COVID-19</b>                                  |      |       |               |
| Yes                                                                                | .388 | 1.429 | 0.635 – 3.220 |
| No (ref)                                                                           | -    | -     | -             |
| <b>Having one or more comorbidities</b>                                            |      |       |               |
| Yes                                                                                | .475 | 0.850 | 0.544 – 1.328 |
| No (ref)                                                                           | -    | -     | -             |
| <b>PPE availability in the workplace</b>                                           |      |       |               |
| Not available or not according to standard (ref)                                   | -    | -     | -             |
| Available and according to standard                                                | .424 | 0.841 | 0.550 – 1.286 |
| <b>Verbal intimidation in the workplace</b>                                        |      |       |               |
| Never (ref)                                                                        | -    | -     | -             |
| At least once                                                                      | .626 | 0.901 | 0.593 – 1.369 |
| <b>Physical intimidation in the workplace</b>                                      |      |       |               |
| Never (ref)                                                                        | -    | -     | -             |
| At least once                                                                      | .920 | 0.944 | 0.303 – 2.939 |
| <b>Intimidation from the society outside workplace</b>                             |      |       |               |
| Never (ref)                                                                        | -    | -     | -             |
| At least once                                                                      | .893 | 0.969 | 0.615 – 1.527 |
| <b>Workplace support from intimidation</b>                                         |      |       |               |
| Yes (ref)                                                                          | -    | -     | -             |
| No                                                                                 | .099 | 1.548 | 0.920 – 2.604 |
| <b>Willingness to work during COVID-19 pandemic</b>                                |      |       |               |
| Yes                                                                                | -    | -     | -             |
| No (ref)                                                                           | .300 | 0.740 | 0.418 – 1.308 |
| <b>Reason for HCW to work during COVID-19 pandemic because feeling responsible</b> |      |       |               |
| Yes                                                                                | .307 | 0.791 | 0.504 – 1.240 |
| No (ref)                                                                           | -    | -     | -             |
| <b>work during COVID-19 pandemic because of financial matters</b>                  |      |       |               |

|                                                                                |      |       |               |
|--------------------------------------------------------------------------------|------|-------|---------------|
| Yes                                                                            | .140 | 1.434 | 0.888 – 2.314 |
| No (ref)                                                                       | -    | -     | -             |
| <b>work during COVID-19 pandemic because already bound to working contract</b> |      |       |               |
| Yes                                                                            | .238 | 0.640 | 0.305 – 1.342 |
| No (ref)                                                                       | -    | -     | -             |

For peer review only

### Checklist for Reporting Results of Internet E-Surveys (CHERRIES)

| <b>Checklist Item</b>            | <b>Explanation</b>                                                                                                                                                                                                                                                                                                                                                                                                                            | <b>Page Number</b> |
|----------------------------------|-----------------------------------------------------------------------------------------------------------------------------------------------------------------------------------------------------------------------------------------------------------------------------------------------------------------------------------------------------------------------------------------------------------------------------------------------|--------------------|
| Describe survey design           | Describe target population, sample frame. Is the sample a convenience sample? (In "open" surveys this is most likely.)                                                                                                                                                                                                                                                                                                                        | 7                  |
| IRB approval                     | Mention whether the study has been approved by an IRB.                                                                                                                                                                                                                                                                                                                                                                                        | 7                  |
| Informed consent                 | Describe the informed consent process. Where were the participants told the length of time of the survey, which data were stored and where and for how long, who the investigator was, and the purpose of the study?                                                                                                                                                                                                                          | 7                  |
| Data protection                  | If any personal information was collected or stored, describe what mechanisms were used to protect unauthorized access.                                                                                                                                                                                                                                                                                                                       | 7                  |
| Development and testing          | State how the survey was developed, including whether the usability and technical functionality of the electronic questionnaire had been tested before fielding the questionnaire.                                                                                                                                                                                                                                                            | N/A                |
| Open survey versus closed survey | An "open survey" is a survey open for each visitor of a site, while a closed survey is only open to a sample which the investigator knows (password-protected survey).                                                                                                                                                                                                                                                                        | 7                  |
| Contact mode                     | Indicate whether or not the initial contact with the potential participants was made on the Internet. (Investigators may also send out questionnaires by mail and allow for Web-based data entry.)                                                                                                                                                                                                                                            | 7                  |
| Advertising the survey           | How/where was the survey announced or advertised? Some examples are offline media (newspapers), or online (mailing lists – If yes, which ones?) or banner ads (Where were these banner ads posted and what did they look like?). It is important to know the wording of the announcement as it will heavily influence who chooses to participate. Ideally the survey announcement should be published as an appendix.                         | N/A                |
| Web/E-mail                       | State the type of e-survey (eg, one posted on a Web site, or one sent out through e-mail). If it is an e-mail survey, were the responses entered manually into a database, or was there an automatic method for capturing responses?                                                                                                                                                                                                          | N/A                |
| Context                          | Describe the Web site (for mailing list/newsgroup) in which the survey was posted. What is the Web site about, who is visiting it, what are visitors normally looking for? Discuss to what degree the content of the Web site could pre-select the sample or influence the results. For example, a survey about vaccination on an anti-immunization Web site will have different results from a Web survey conducted on a government Web site | N/A                |
| Mandatory/voluntary              | Was it a mandatory survey to be filled in by every visitor who wanted to enter the Web site, or was it a voluntary survey?                                                                                                                                                                                                                                                                                                                    | N/A                |
| Incentives                       | Were any incentives offered (eg, monetary, prizes, or non-monetary incentives such as an offer to provide the survey results)?                                                                                                                                                                                                                                                                                                                | N/A                |

|                                                                                                           |                                                                                                                                                                                                                                                                                                                                                                                                                                                                                               |          |
|-----------------------------------------------------------------------------------------------------------|-----------------------------------------------------------------------------------------------------------------------------------------------------------------------------------------------------------------------------------------------------------------------------------------------------------------------------------------------------------------------------------------------------------------------------------------------------------------------------------------------|----------|
| Time/Date                                                                                                 | In what timeframe were the data collected?                                                                                                                                                                                                                                                                                                                                                                                                                                                    | 7        |
| Randomization of items or questionnaires                                                                  | To prevent biases items can be randomized or alternated.                                                                                                                                                                                                                                                                                                                                                                                                                                      | N/A      |
| Adaptive questioning                                                                                      | Use adaptive questioning (certain items, or only conditionally displayed based on responses to other items) to reduce number and complexity of the questions.                                                                                                                                                                                                                                                                                                                                 | N/A      |
| Number of Items                                                                                           | What was the number of questionnaire items per page? The number of items is an important factor for the completion rate.                                                                                                                                                                                                                                                                                                                                                                      | 7        |
| Number of screens (pages)                                                                                 | Over how many pages was the questionnaire distributed? The number of items is an important factor for the completion rate.                                                                                                                                                                                                                                                                                                                                                                    | 7        |
| Completeness check                                                                                        | It is technically possible to do consistency or completeness checks before the questionnaire is submitted. Was this done, and if "yes", how (usually JavaScript)? An alternative is to check for completeness after the questionnaire has been submitted (and highlight mandatory items). If this has been done, it should be reported. All items should provide a non-response option such as "not applicable" or "rather not say", and selection of one response option should be enforced. | 8        |
| Review step                                                                                               | State whether respondents were able to review and change their answers (eg, through a Back button or a Review step which displays a summary of the responses and asks the respondents if they are correct).                                                                                                                                                                                                                                                                                   | 8        |
| Unique site visitor                                                                                       | If you provide view rates or participation rates, you need to define how you determined a unique visitor. There are different techniques available, based on IP addresses or cookies or both.                                                                                                                                                                                                                                                                                                 | N/A      |
| View rate (Ratio of unique survey visitors/unique site visitors)                                          | Requires counting unique visitors to the first page of the survey, divided by the number of unique site visitors (not page views!). It is not unusual to have view rates of less than 0.1 % if the survey is voluntary.                                                                                                                                                                                                                                                                       | N/A      |
| Participation rate (Ratio of unique visitors who agreed to participate/unique first survey page visitors) | Count the unique number of people who filled in the first survey page (or agreed to participate, for example by checking a checkbox), divided by visitors who visit the first page of the survey (or the informed consents page, if present). This can also be called "recruitment" rate.                                                                                                                                                                                                     | N/A      |
| Completion rate (Ratio of users who finished the survey/users who                                         | The number of people submitting the last questionnaire page, divided by the number of people who agreed to participate (or submitted the first survey page). This is only relevant if there is a separate "informed consent" page or if the survey goes over several pages. This is a measure for attrition. Note that                                                                                                                                                                        | Figure 1 |



|    |                                                     |                                                                                                                                                                                                                                                                                                                                                                                                                                                                                                                                                                            |     |
|----|-----------------------------------------------------|----------------------------------------------------------------------------------------------------------------------------------------------------------------------------------------------------------------------------------------------------------------------------------------------------------------------------------------------------------------------------------------------------------------------------------------------------------------------------------------------------------------------------------------------------------------------------|-----|
| 1  | agreed to participate)                              | "completion" can involve leaving questionnaire items blank. This is not a measure for how completely questionnaires were filled in. (If you need a measure for this, use the word "completeness rate".)                                                                                                                                                                                                                                                                                                                                                                    |     |
| 2  |                                                     |                                                                                                                                                                                                                                                                                                                                                                                                                                                                                                                                                                            |     |
| 3  |                                                     |                                                                                                                                                                                                                                                                                                                                                                                                                                                                                                                                                                            |     |
| 4  |                                                     |                                                                                                                                                                                                                                                                                                                                                                                                                                                                                                                                                                            |     |
| 5  |                                                     |                                                                                                                                                                                                                                                                                                                                                                                                                                                                                                                                                                            |     |
| 6  | Cookies used                                        | Indicate whether cookies were used to assign a unique user identifier to each client computer. If so, mention the page on which the cookie was set and read, and how long the cookie was valid. Were duplicate entries avoided by preventing users access to the survey twice; or were duplicate database entries having the same user ID eliminated before analysis? In the latter case, which entries were kept for analysis (eg, the first entry or the most recent)?                                                                                                   | N/A |
| 7  |                                                     |                                                                                                                                                                                                                                                                                                                                                                                                                                                                                                                                                                            |     |
| 8  |                                                     |                                                                                                                                                                                                                                                                                                                                                                                                                                                                                                                                                                            |     |
| 9  |                                                     |                                                                                                                                                                                                                                                                                                                                                                                                                                                                                                                                                                            |     |
| 10 |                                                     |                                                                                                                                                                                                                                                                                                                                                                                                                                                                                                                                                                            |     |
| 11 | IP check                                            | Indicate whether the IP address of the client computer was used to identify potential duplicate entries from the same user. If so, mention the period of time for which no two entries from the same IP address were allowed (eg, 24 hours). Were duplicate entries avoided by preventing users with the same IP address access to the survey twice; or were duplicate database entries having the same IP address within a given period of time eliminated before analysis? If the latter, which entries were kept for analysis (eg, the first entry or the most recent)? | 7   |
| 12 |                                                     |                                                                                                                                                                                                                                                                                                                                                                                                                                                                                                                                                                            |     |
| 13 |                                                     |                                                                                                                                                                                                                                                                                                                                                                                                                                                                                                                                                                            |     |
| 14 |                                                     |                                                                                                                                                                                                                                                                                                                                                                                                                                                                                                                                                                            |     |
| 15 |                                                     |                                                                                                                                                                                                                                                                                                                                                                                                                                                                                                                                                                            |     |
| 16 |                                                     |                                                                                                                                                                                                                                                                                                                                                                                                                                                                                                                                                                            |     |
| 17 |                                                     |                                                                                                                                                                                                                                                                                                                                                                                                                                                                                                                                                                            |     |
| 18 | Log file analysis                                   | Indicate whether other techniques to analyze the log file for identification of multiple entries were used. If so, please describe.                                                                                                                                                                                                                                                                                                                                                                                                                                        | N/A |
| 19 |                                                     |                                                                                                                                                                                                                                                                                                                                                                                                                                                                                                                                                                            |     |
| 20 |                                                     |                                                                                                                                                                                                                                                                                                                                                                                                                                                                                                                                                                            |     |
| 21 | Registration                                        | In "closed" (non-open) surveys, users need to login first and it is easier to prevent duplicate entries from the same user. Describe how this was done. For example, was the survey never displayed a second time once the user had filled it in, or was the username stored together with the survey results and later eliminated? If the latter, which entries were kept for analysis (eg, the first entry or the most recent)?                                                                                                                                          | N/A |
| 22 |                                                     |                                                                                                                                                                                                                                                                                                                                                                                                                                                                                                                                                                            |     |
| 23 |                                                     |                                                                                                                                                                                                                                                                                                                                                                                                                                                                                                                                                                            |     |
| 24 |                                                     |                                                                                                                                                                                                                                                                                                                                                                                                                                                                                                                                                                            |     |
| 25 | Handling of incomplete questionnaires               | Were only completed questionnaires analyzed? Were questionnaires which terminated early (where, for example, users did not go through all questionnaire pages) also analyzed?                                                                                                                                                                                                                                                                                                                                                                                              | 9   |
| 26 |                                                     |                                                                                                                                                                                                                                                                                                                                                                                                                                                                                                                                                                            |     |
| 27 |                                                     |                                                                                                                                                                                                                                                                                                                                                                                                                                                                                                                                                                            |     |
| 28 | Questionnaires submitted with an atypical timestamp | Some investigators may measure the time people needed to fill in a questionnaire and exclude questionnaires that were submitted too soon. Specify the timeframe that was used as a cut-off point, and describe how this point was determined.                                                                                                                                                                                                                                                                                                                              | N/A |
| 29 |                                                     |                                                                                                                                                                                                                                                                                                                                                                                                                                                                                                                                                                            |     |
| 30 |                                                     |                                                                                                                                                                                                                                                                                                                                                                                                                                                                                                                                                                            |     |
| 31 |                                                     |                                                                                                                                                                                                                                                                                                                                                                                                                                                                                                                                                                            |     |
| 32 | Statistical correction                              | Indicate whether any methods such as weighting of items or propensity scores have been used to adjust for the non-representative sample; if so, please describe the methods.                                                                                                                                                                                                                                                                                                                                                                                               | N/A |
| 33 |                                                     |                                                                                                                                                                                                                                                                                                                                                                                                                                                                                                                                                                            |     |
| 34 |                                                     |                                                                                                                                                                                                                                                                                                                                                                                                                                                                                                                                                                            |     |
| 35 |                                                     |                                                                                                                                                                                                                                                                                                                                                                                                                                                                                                                                                                            |     |

36 This checklist has been modified from Eysenbach G. Improving the quality of Web surveys: the Checklist for Reporting Results of Internet E-Surveys (CHERRIES). J Med Internet Res. 2004 Sep 29;6(3):e34 [erratum in J Med Internet Res. 2012; 14(1): e8.]. Article available at  
37 <https://www.jmir.org/2004/3/e34/>; erratum available <https://www.jmir.org/2012/1/e8/>. Copyright ©Gunther Eysenbach. Originally published in the  
38 [Journal of Medical Internet](https://www.jmir.org/2004/3/e34/) Research, 29.9.2004 and 04.01.2012.  
39  
40  
41  
42  
43  
44  
45  
46

1  
2  
3 This is an open-access article distributed under the terms of the Creative Commons Attribution License (<https://creativecommons.org/licenses/by/2.0/>),  
4 which permits unrestricted use, distribution, and reproduction in any medium, provided the original work, first published in the Journal of Medical Internet  
5 Research, is properly cited.  
6  
7  
8  
9  
10  
11  
12  
13  
14  
15  
16  
17  
18  
19  
20  
21  
22  
23  
24  
25  
26  
27  
28  
29  
30  
31  
32  
33  
34  
35  
36  
37  
38  
39  
40  
41  
42  
43  
44  
45  
46

For peer review only

# BMJ Open

## Mental Health and Health-Related Quality of Life among Healthcare Workers in Indonesia during the Coronavirus Disease 2019 Pandemic

|                                 |                                                                                                                                                                                                                                                                                                                                                                                                                                                                                                                                                                                                                                                                                                                                                                                                                                                                                                                                                                                                                                                                                                                                                                                                                                                                                                                    |
|---------------------------------|--------------------------------------------------------------------------------------------------------------------------------------------------------------------------------------------------------------------------------------------------------------------------------------------------------------------------------------------------------------------------------------------------------------------------------------------------------------------------------------------------------------------------------------------------------------------------------------------------------------------------------------------------------------------------------------------------------------------------------------------------------------------------------------------------------------------------------------------------------------------------------------------------------------------------------------------------------------------------------------------------------------------------------------------------------------------------------------------------------------------------------------------------------------------------------------------------------------------------------------------------------------------------------------------------------------------|
| Journal:                        | <i>BMJ Open</i>                                                                                                                                                                                                                                                                                                                                                                                                                                                                                                                                                                                                                                                                                                                                                                                                                                                                                                                                                                                                                                                                                                                                                                                                                                                                                                    |
| Manuscript ID                   | bmjopen-2021-057963.R1                                                                                                                                                                                                                                                                                                                                                                                                                                                                                                                                                                                                                                                                                                                                                                                                                                                                                                                                                                                                                                                                                                                                                                                                                                                                                             |
| Article Type:                   | Original research                                                                                                                                                                                                                                                                                                                                                                                                                                                                                                                                                                                                                                                                                                                                                                                                                                                                                                                                                                                                                                                                                                                                                                                                                                                                                                  |
| Date Submitted by the Author:   | 03-Mar-2022                                                                                                                                                                                                                                                                                                                                                                                                                                                                                                                                                                                                                                                                                                                                                                                                                                                                                                                                                                                                                                                                                                                                                                                                                                                                                                        |
| Complete List of Authors:       | Syamlan, Adila T.; Faculty of Medicine Universitas Airlangga - Dr. Soetomo General Academic Hospital, Department of Psychiatry Salamah, Sovia; Faculty of Medicine Universitas Airlangga, Department of Public Health and Preventive Medicine; University Medical Centre Groningen, Division of Nephrology, Department of Internal Medicine, University Medical Center Groningen, Groningen, The Netherland. Alkaff, Firas; Faculty of Medicine Universitas Airlangga, Department of Anatomy, Histology, and Pharmacology; University Medical Centre Groningen, Division of Nephrology, Department of Internal Medicine, University Medical Center Groningen, Groningen, The Netherland. Prayudi, Yogi E.; Faculty of Medicine Universitas Airlangga Kamil, Muhammad; Faculty of Medicine Universitas Airlangga - Dr. Soetomo General Academic Hospital, Department of Neurosurgery Irzaldy, Abyan; Karolinska Institute Karimah, Azimatul; Faculty of Medicine Universitas Airlangga - Dr. Soetomo General Academic Hospital, Department of Psychiatry Postma, Maarten; University of Groningen, Pharmacoepidemiology and Pharmacoeconomics Purba, Fredrick; Padjadjaran University, Department of Developmental Psychology Arifin, Bustanul; University of Groningen, Pharmacoepidemiology and Pharmacoeconomics |
| <b>Primary Subject Heading</b>: | Public health                                                                                                                                                                                                                                                                                                                                                                                                                                                                                                                                                                                                                                                                                                                                                                                                                                                                                                                                                                                                                                                                                                                                                                                                                                                                                                      |
| Secondary Subject Heading:      | Epidemiology, Mental health                                                                                                                                                                                                                                                                                                                                                                                                                                                                                                                                                                                                                                                                                                                                                                                                                                                                                                                                                                                                                                                                                                                                                                                                                                                                                        |
| Keywords:                       | COVID-19, MENTAL HEALTH, PUBLIC HEALTH, EPIDEMIOLOGY                                                                                                                                                                                                                                                                                                                                                                                                                                                                                                                                                                                                                                                                                                                                                                                                                                                                                                                                                                                                                                                                                                                                                                                                                                                               |
|                                 |                                                                                                                                                                                                                                                                                                                                                                                                                                                                                                                                                                                                                                                                                                                                                                                                                                                                                                                                                                                                                                                                                                                                                                                                                                                                                                                    |

SCHOLARONE™  
Manuscripts



I, the Submitting Author has the right to grant and does grant on behalf of all authors of the Work (as defined in the below author licence), an exclusive licence and/or a non-exclusive licence for contributions from authors who are: i) UK Crown employees; ii) where BMJ has agreed a CC-BY licence shall apply, and/or iii) in accordance with the terms applicable for US Federal Government officers or employees acting as part of their official duties; on a worldwide, perpetual, irrevocable, royalty-free basis to BMJ Publishing Group Ltd ("BMJ") its licensees and where the relevant Journal is co-owned by BMJ to the co-owners of the Journal, to publish the Work in this journal and any other BMJ products and to exploit all rights, as set out in our [licence](#).

The Submitting Author accepts and understands that any supply made under these terms is made by BMJ to the Submitting Author unless you are acting as an employee on behalf of your employer or a postgraduate student of an affiliated institution which is paying any applicable article publishing charge ("APC") for Open Access articles. Where the Submitting Author wishes to make the Work available on an Open Access basis (and intends to pay the relevant APC), the terms of reuse of such Open Access shall be governed by a Creative Commons licence – details of these licences and which [Creative Commons](#) licence will apply to this Work are set out in our licence referred to above.

Other than as permitted in any relevant BMJ Author's Self Archiving Policies, I confirm this Work has not been accepted for publication elsewhere, is not being considered for publication elsewhere and does not duplicate material already published. I confirm all authors consent to publication of this Work and authorise the granting of this licence.

1  
2  
3 **1 Mental Health and Health-Related Quality of Life among Healthcare Workers in**  
4  
5 **2 Indonesia during the Coronavirus Disease 2019 Pandemic**  
6

7  
8 **3 Running title:** HCW mental health and HRQoL during pandemic  
9

10  
11  
12  
13 5 Adila T. Syamlan<sup>1#</sup>, Sovia Salamah<sup>2,3#\*</sup>, Firas F. Alkaff<sup>3,4\*</sup>, Yogi E. Prayudi<sup>5</sup>,  
14  
15 6 Muhammad Kamil<sup>6</sup>, Abyan Irzaldy<sup>7</sup>, Azimatul Karimah<sup>1</sup>, Maarten J. Postma<sup>4,8,9,10,11</sup>,  
16  
17 7 Fredrick D. Purba<sup>12</sup>, Bustanul Arifin<sup>8,13,14</sup>  
18

19  
20  
21  
22 9 <sup>1</sup>Department of Psychiatry, Faculty of Medicine Universitas Airlangga – Dr. Soetomo  
23  
24 10 General Academic Hospital, Surabaya, Indonesia

25  
26 11 <sup>2</sup>Department of Public Health and Preventive Medicine, Faculty of Medicine  
27  
28 12 Universitas Airlangga, Surabaya, Indonesia

29  
30  
31 13 <sup>3</sup>Department of Internal Medicine, University Medical Center Groningen, Groningen,  
32  
33 14 The Netherlands

34  
35 15 <sup>4</sup>Division of Pharmacology and Therapy, Department of Anatomy, Histology, and  
36  
37 16 Pharmacology, Faculty of Medicine Universitas Airlangga, Surabaya, Indonesia

38  
39 17 <sup>5</sup>Faculty of Medicine Universitas Airlangga, Surabaya, Indonesia

40  
41  
42 18 <sup>6</sup>Department of Neurosurgery, Faculty of Medicine Universitas Airlangga, Surabaya,  
43  
44 19 Indonesia

45  
46  
47 20 <sup>7</sup>Karolinska Institute, Solna, Sweden

48  
49  
50 21 <sup>8</sup>Department of Health Sciences, University of Groningen, University Medical Center  
51  
52 22 Groningen, Groningen, The Netherlands

53  
54 23 <sup>9</sup>Institute of Science in Healthy Ageing & healthcaRE (SHARE), University Medical  
55  
56 24 Center Groningen, University of Groningen, Groningen, The Netherlands  
57  
58  
59  
60

1  
2  
3 25 <sup>10</sup>Unit of PharmacoTherapy, Epidemiology and Economics (PTE2), Department of  
4  
5 26 Pharmacy, University of Groningen, Groningen, The Netherlands  
6  
7

8 27 <sup>11</sup>Department of Economics, Econometrics and Finance, Faculty of Economics &  
9  
10 28 Business, University of Groningen, Groningen, The Netherlands  
11

12 29 <sup>12</sup>Department of Developmental Psychology, Faculty of Psychology, Universitas  
13  
14 30 Padjadjaran, Bandung, Indonesia  
15

16  
17 31 <sup>13</sup>Pharmacy Faculty, Universitas Hasanuddin, Makassar, Sulawesi Selatan, Indonesia  
18

19 32 <sup>14</sup>Faculty of Medicine, Public Health and Nursing, Universitas Gadjah Mada,  
20  
21 33 Yogyakarta, Indonesia  
22

23  
24 34 #Co-first author, these authors contributed equally to this work.  
25

26 35 \*Corresponding authors:  
27

28 36 Sovia Salamah  
29

30  
31 37 Hanzeplein 1, 9713GZ, Groningen, The Netherlands / Jl. Mayjen Prof. Dr. Moestopo  
32  
33 38 No 47, Surabaya, East Java 60132, Indonesia.  
34

35 39 Email: [s.salamah@umcg.nl](mailto:s.salamah@umcg.nl) / [sovia.salamah@fk.unair.ac.id](mailto:sovia.salamah@fk.unair.ac.id)  
36

37 40 Telephone: +31651114511 / +6282244485448  
38  
39

40 41

41 42 Firas Farisi Alkaff  
43

44 43 Hanzeplein 1, 9713GZ, Groningen, The Netherlands / Jl. Mayjen Prof. Dr. Moestopo  
45  
46 44 No 47, Surabaya, East Java 60132, Indonesia.  
47

48 45 Email: [f.f.alkaff@umcg.nl](mailto:f.f.alkaff@umcg.nl) / [firasfarisialkaff@fk.unair.ac.id](mailto:firasfarisialkaff@fk.unair.ac.id)  
49

50 46 Telephone: +31616383945 / +6281330101993  
51  
52  
53

54 47

55  
56 48 **Keywords:** anxiety; COVID-19; depression; Indonesia; Quality of life; stress  
57

58 49 **Word count:** 3458 words  
59  
60

1  
2  
3 **Abstract**  
4

51 **Objectives:** Healthcare workers (HCWs) are the front lines during the coronavirus  
52 disease 2019 (COVID-19) pandemic. They are more exposed to COVID-19 than other  
53 professions. Studies from other countries have shown that the mental health and  
54 health-related quality of life (HRQoL) of HCWs were affected during this pandemic.  
55 However, studies on mental health in Indonesia remain scarce and no study has  
56 evaluated the HRQoL among HCWs. Thus, this study was designed to explore the  
57 mental health status and HRQoL among HCWs in Indonesia.

58 **Design:** This was a cross-sectional study.

59 **Setting:** This was an open online survey in Indonesia conducted from December 2020  
60 to February 2021.

61 **Participants:** This study involved HCWs who worked during the COVID-19  
62 pandemic. Of the 502 respondents who filled the online questionnaire, 392 were  
63 included in the analysis.

64 **Outcomes:** Mental health status was measured using the 21-item Depression, Anxiety,  
65 and Stress Scale (DASS-21) and HRQoL was measured using the second version of  
66 the 12-item Short-Form Health Survey (SF12v2).

67 **Results:** The prevalence of depression, anxiety, and stress among HCWs was 29.4%,  
68 44.9%, and 31.8%, respectively. Using the SF12v2 questionnaire, 354 (90.3%) HCWs  
69 were found to have impaired physical component and 156 (39.8%) HCWs have  
70 impaired mental component.

71 **Conclusion:** The prevalence of mental health problems among HCWs was high in  
72 Indonesia. HRQoL, particularly the physical component, was affected in most HCWs.  
73 Thus, policymakers should give more attention to the mental health and HRQoL of  
74 HCWs during the COVID-19 pandemic.

75

**76 Strength and limitations of this study**

- 77 • This study assessed the prevalence of and determinants for mental health  
78 problems and impaired Health-related quality of life (HRQoL) among  
79 healthcare workers (HCWs) during the coronavirus disease 2019 (COVID-19)  
80 pandemic in Indonesia.
- 81 • We performed univariate logistic regression analysis, followed by multivariate  
82 logistic regression analysis using backward selection, to determine the  
83 determinants for mental health problems and impaired HRQoL.
- 84 • The cross-sectional nature of this study could not identify temporal  
85 relationships between the course of the COVID-19 pandemic and mental  
86 health problems and HRQoL impairment.
- 87 • Because of the nonprobability purposive sampling method, generalization of  
88 this study's findings to all HCWs in Indonesia should be done cautiously.



## 89 **Background**

90 Coronavirus disease 2019 (COVID-19), caused by severe acute respiratory syndrome  
91 coronavirus 2 (SARS-CoV-2), emerged in December 2019 in Wuhan, Hubei Province  
92 of China <sup>1</sup>. This virus is related to SARS-CoV-1, which was the cause of SARS in  
93 2002 and Middle East Respiratory Syndrome (Mers-CoV) in 2012 <sup>2</sup>. As of March 11,  
94 2020, the World Health Organization characterized COVID-19 as a pandemic <sup>3</sup>. To  
95 this date, over 428 million were affected by this disease with over 5 million of deaths  
96 worldwide <sup>4</sup>. In Indonesia, the first official case of COVID-19 was on March 2, 2020 <sup>5</sup>.  
97 After that, the number of reported cases in Indonesia has been exponentially  
98 increasing. Currently, over 3.9 million individuals are positive for the disease with  
99 more than 121,000 deaths <sup>6</sup>.

100

101 Healthcare workers (HCWs) are the front lines during the COVID-19 pandemic and  
102 thus are more exposed to COVID-19 than other professions. Worldwide, the total  
103 number of deaths among HCWs is over 155 ,000 <sup>7</sup>. In Indonesia, the total number of  
104 deaths among HCWs is 2,066 to this date <sup>8</sup>. Although the reported mortality rate  
105 among HCWs is lower than that in the general population <sup>9,10</sup>, higher levels of mental  
106 health problems were found among HCWs <sup>11</sup>. Heavy workload and lack of personal  
107 protective equipment (PPE) are highlighted as profession-related contributing risk  
108 factors <sup>12</sup>.

109

110 A recently published systematic review has revealed that the prevalence of depression  
111 and anxiety among HCWs during the COVID-19 pandemic was 37% and 40%,  
112 respectively <sup>13</sup>. This prevalence was higher than that observed in non-pandemic  
113 situations, where the prevalence of depression and anxiety was 11.3% and 17.3%,

1  
2  
3 114 respectively <sup>14</sup>. However, no study from Indonesia was included in this meta-analysis  
4  
5 115 <sup>13, 15</sup>. To this date, studies on mental health among HCWs in Indonesia remain scarce  
6  
7  
8 116 and are either focusing on a certain HCW profession or conducted only in one part of  
9  
10 117 the country <sup>16-20</sup>. Other than that, all studies have adopted a cross-sectional study  
11  
12 118 design, thus only illustrating a particular moment of the pandemic. However, no study  
13  
14  
15 119 has been conducted during the later stage of the COVID-19 pandemic in Indonesia  
16  
17 120 when the number of cases and deaths was increasing <sup>21</sup>.

18  
19 121  
20  
21 122 Besides mental health problems, health-related quality of life (HRQoL) is also  
22  
23 123 affected during the COVID-19 pandemic <sup>22</sup>. Currently, few published studies have  
24  
25 124 evaluated the HRQoL of HCWs during the COVID-19 pandemic <sup>23-31</sup>; however, no  
26  
27 125 such studies have been conducted in Indonesia. Thus, this study was designed to  
28  
29 126 explore the mental health status and HRQoL among HCWs in Indonesia and identify  
30  
31 127 the determining factors.  
32  
33  
34  
35  
36  
37  
38  
39  
40  
41  
42  
43  
44  
45  
46  
47  
48  
49  
50  
51  
52  
53  
54  
55  
56  
57  
58  
59  
60

1  
2  
3 128 **Methods**

4  
5 129 Study design

6  
7  
8 130 This study was a cross-sectional study using an open online questionnaire.  
9  
10 131 SurveyMonkey® was used as the survey platform. Using this survey platform, each  
11  
12 132 respondent can only participate in the questionnaire once because the Internet  
13  
14 133 Protocol address was used to identify potential duplicate entries from the same  
15  
16 134 respondent. The questionnaire link was distributed through social media, that is,  
17  
18 135 WhatsApp and Instagram, the most popular and accessible social media platforms in  
19  
20 136 Indonesia.  
21  
22

23  
24 137  
25  
26 138 Participants

27  
28 139 The study participants were HCWs in Indonesia and were recruited using a  
29  
30 140 nonprobability purposive snowball sampling technique. The inclusion criteria were as  
31  
32 141 follows: HCWs who were actively working during the COVID-19 pandemic and  
33  
34 142 agreed to participate in this study. The HCWs in this study were defined as those who  
35  
36 143 worked in the healthcare sector <sup>32</sup>. Informed consent was obtained from each  
37  
38 144 respondent. Data collection was conducted from December 2020 to February 2021.  
39  
40 145 The minimum required sample size was calculated using EpiInfo™ <sup>33</sup>. Using an  
41  
42 146 expected frequency of 50%, a minimum of 384 samples were needed to obtain  
43  
44 147 sufficient statistical power, assuming 95% confidence intervals.  
45  
46  
47  
48

49 148  
50  
51 149 Ethics

52  
53 150 This study was performed according to the principles of the Declaration of Helsinki  
54  
55 151 and approved by the relevant Institutional Review Board. The data were kept  
56  
57 152 confidential and no personally identifiable information was reported.  
58  
59  
60

153

154 Instruments

155 The questionnaire contained 60 questions, separated into 4 pages. The time needed to  
156 complete the questionnaire was 15-20 minutes. All questions were mandatory to  
157 answer and respondents could not move to the next page if all questions on the  
158 previous page had not been answered. Before submitting the questionnaire, the  
159 respondents could review and change their answers.

160

161 The background and demographic characteristics of each respondent were obtained  
162 using a questionnaire that contained questions on the respondent's gender, age,  
163 marital status, specific job, workplace setting during the pandemic, workplace  
164 location, working experience as an HCW before the COVID-19 pandemic, working  
165 hours per week, monthly income, history of COVID-19 infection, comorbidities,  
166 availability of personal protective equipment in the workplace, verbal or physical  
167 intimidation in the workplace, intimidation from the society outside the workplace,  
168 support from the workplace if there is any intimidation, willingness to work during  
169 the COVID-19 pandemic, and reason for working during the COVID-19 pandemic.

170

171 Mental health was measured using the Indonesian version of 21-item Depression,  
172 Anxiety, and Stress Scale (DASS-21)<sup>34</sup>. This questionnaire has been adapted to  
173 Bahasa Indonesia previously and showed good validity and reliability<sup>35</sup>. The  
174 DASS-21 is a self-administered questionnaire consisting of depression, anxiety, and  
175 stress subscales, each composed of 7 items. Every item could have a score ranging  
176 from 0, indicating a lack of symptoms in the past week, to 3, indicating the presence  
177 of symptoms for almost every day in the past week. To calculate the final score of

1  
2  
3 178 each subscale, the score was multiplied by 2. The minimum final score was 0 and the  
4  
5 179 maximum score was 42 for each subscale. Based on the total score, mental health can  
6  
7  
8 180 be categorized into normal or mild, moderate, severe, or extremely impaired (**Table 1**)  
9  
10 181 <sup>34</sup>.

11  
12 182  
13  
14 183 HRQoL was evaluated using the second version of the 12-item Short-Form Health  
15  
16 184 Survey (SF12v2) (license number: QM054173) <sup>36</sup>. The use of SF12v2 to evaluate  
17  
18 185 HRQoL was based on the consideration that it can be used in nonpatient populations  
19  
20 186 and has fewer questions than other HRQoL questionnaires. The SF12v2 has been  
21  
22 187 adapted to Bahasa Indonesia previously and showed good validity and reliability.<sup>37</sup>  
23  
24 188 This questionnaire measures both the physical and mental health components, which  
25  
26 189 are divided into 8 health domain scales, that is, physical functioning (PF), role  
27  
28 190 physical (RP), bodily pain (BP), general health (GH), vitality (VT), social functioning  
29  
30 191 (SF), role emotional (RE), and mental health (MH). PF, RP, BP, and GH have the  
31  
32 192 greatest physical component among the health domains, whereas VT, SF, RE, and  
33  
34 193 MH have the greatest mental component <sup>36</sup>. The explanations of each domain scale  
35  
36 194 have been described elsewhere <sup>37</sup>. The SF12v2 was scored using Optum® PRO CoRE  
37  
38 195 software (Optum PROCoRE 1.3 Smart Measurement System. Optum Inc., USA). The  
39  
40 196 software will generate the score for each health domain and the summary scores of the  
41  
42 197 physical and mental components. Scores of less than 47 indicate significant  
43  
44 198 impairment in the associated health domain <sup>36</sup>.

45  
46  
47 199

#### 200 Data analysis

201 Only completed questionnaires were included in the data analysis. Acquired data were  
202 analyzed using IBM SPSS Statistics for Windows version 25.0. (IBM Corp., Armonk,

1  
2  
3 203 NY, USA). Differences with  $p$  values  $< .05$  were considered statistically significant.  
4  
5 204 The one-sample Kolmogorov-Smirnov test was used to evaluate the data distribution.  
6  
7  
8 205 Normally distributed data was presented as mean  $\pm$  SD, skewed data was presented as  
9  
10 206 median [interquartile range (IQR)], and nominal data was presented as  $n$  (%). To  
11  
12 207 discover the determinants of mental health and HRQoL, multiple logistic regression  
13  
14 208 analysis using backward selection was used. Data analysis was conducted in two  
15  
16  
17 209 phases. In the first phase, univariate logistic regression was used to identify  
18  
19 210 independent variables associated with mental health status and HRQoL. Variables  
20  
21 211 with  $p$  values  $< .1$  were included in the next phase. In the second phase, multivariate  
22  
23 212 logistic regression using backward selection was used. Variables with  $p$  values  $< .05$   
24  
25 213 from multivariate regression analysis were considered as the determinants<sup>38</sup>. During  
26  
27 214 the analysis to determine the determinants, mental health variables were recategorized  
28  
29 215 into dichotomous (normal or not) variables with the cutoff as follows: 9 for  
30  
31 216 depression, 6 for anxiety, and 10 for stress<sup>34</sup>.  
32  
33  
34  
35  
36  
37

### 38 Patient and public involvement

39  
40 219 Patients and the public were not involved in this study.  
41  
42  
43  
44  
45  
46  
47  
48  
49  
50  
51  
52  
53  
54  
55  
56  
57  
58  
59  
60

## 220 **Results**

221 Of the 502 HCWs who accessed the online questionnaire, 392 were included for the  
222 analysis. The total response rate for this study was 78% (**Figure 1**). The detailed  
223 sociodemographic characteristics of the respondents are summarized in **Table 2**.

### 225 Mental Health

226 The median scores of the depression, anxiety, and stress subscales were 6 [2–10], 6  
227 [2–12], and 10 [4–10], respectively. Of the 392 respondents, 119 (29.4%) experienced  
228 depression, 176 (44.9%) experienced anxiety, and 164 (31.8%) experienced stress  
229 (**Figure 2**). Stratified by gender, the prevalence of depression, anxiety, and stress  
230 among male HCWs was 27 (21.3%), 42 (33.1%), and 45 (35.4%), respectively,  
231 whereas the prevalence of depression, anxiety, and stress among female HCWs was  
232 92 (34.7%), 134 (50.6%), and 119 (44.9%), respectively (**Supplementary Figure 1**  
233 **and 2**).

234  
235 To find the determinants of depression among HCWs, multivariate logistic regression  
236 analysis was performed by including all variables that had a *p* value of < .1 in the  
237 univariate analysis (**Supplementary Table 1**). Female HCWs, HCWs who did not  
238 receive support from the workplace when intimidated by the patients or patients'  
239 family members because of COVID-19-related issues, and HCWs that worked during  
240 the pandemic because they were bound by working contracts were more likely to be  
241 depressed. Meanwhile, HCWs with working experience of more than 3 years in  
242 healthcare facilities were less likely to be depressed (**Table 3**).

243

1  
2  
3 244 To find the determinants of anxiety among HCWs, multivariate logistic regression  
4  
5 245 analysis was performed by including all variables that had a *p* value of < .1 in the  
6  
7 246 univariate analysis (**Supplementary Table 2**). Female HCWs, HCWs who did not  
8  
9 247 receive support from the workplace when intimidated by the patients or patients'  
10  
11 248 family members, and HCWs who were not willing to work during the COVID-19  
12  
13 249 pandemic were more likely to be anxious. Meanwhile, older HCWs and HCWs who  
14  
15 250 worked in healthcare facilities other than COVID-19 hospitals or referral hospitals for  
16  
17 251 COVID-19 were less likely to be anxious (**Table 4**).  
18  
19  
20  
21  
22

23  
24 253 To find the determinants of stress among HCWs, multivariate logistic regression  
25  
26 254 analysis was performed by including all variables that had a *p* value of < .1 in the  
27  
28 255 univariate analysis (**Supplementary Table 3**). HCWs who did not receive support  
29  
30 256 from the workplace when intimidated by the patients or patients' family members,  
31  
32 257 HCWs who are not willing to work during the COVID-19 pandemic, and HCWs who  
33  
34 258 worked during the pandemic because of financial matters or because they were bound  
35  
36 259 by working contracts were more likely to be stressed. Meanwhile, older HCWs were  
37  
38 260 less likely to be stressed (**Table 5**).  
39  
40  
41  
42  
43

#### 44 262 HRQoL

45  
46  
47 263 The median score of the physical component summary (PCS) was 41.80 [39.15–44.14]  
48  
49 264 and the median score of the mental component summary (MCS) was 49.81 [43.25–  
50  
51 265 55.95]. The detailed scores of the PCS, MCS, and each health domain scale are  
52  
53 266 summarized in **Figure 3**. Of the 392 HCWs, 354 (90.3%) had an impairment in the  
54  
55 267 physical component and 156 (39.8%) had an impairment in the mental component  
56  
57  
58 268 (**Figure 4**).  
59  
60



1  
2  
3 269  
4

5 270 To find the determinants of impaired physical and mental health components among  
6  
7  
8 271 HCWs, multivariate logistic regression analysis was performed by including all  
9  
10 272 variables that had a  $p$  value of  $< .1$  in the univariate analysis (**Supplementary Table**  
11  
12 273 **4 and 5**). However, no determinants were found in the multivariate analysis.  
13  
14  
15  
16  
17  
18  
19  
20  
21  
22  
23  
24  
25  
26  
27  
28  
29  
30  
31  
32  
33  
34  
35  
36  
37  
38  
39  
40  
41  
42  
43  
44  
45  
46  
47  
48  
49  
50  
51  
52  
53  
54  
55  
56  
57  
58  
59  
60

For peer review only

## 274 **Discussion**

275 The results of this study provided additional information on the mental health  
276 conditions and HRQoL among Indonesian HCWs. Moreover, this study identified  
277 several significant determinants of stress, anxiety, and depression among HCWs. This  
278 may also act as a guide for relevant actions that can be taken by relevant authorities to  
279 provide preventive efforts regarding mental health matters.

### 281 Mental health

282 The prevalence of depression, anxiety, and stress observed in this study was 29.4%,  
283 44.9%, and 31.8%, respectively, which were higher than that reported in previous  
284 studies from Indonesia that also used the DASS-21 as the study instrument, wherein  
285 the prevalence was 2.4–13.2% for depression, 6.8–20.6% for anxiety, and 5.7–11%  
286 for stress<sup>16, 17, 19</sup>. The discrepancy between this study and previous studies might be  
287 attributed to the time difference in data collection. In this study, data collection was  
288 performed in the later time of the pandemic, whereas in previous studies, data  
289 collection was performed at the beginning of the pandemic.

291 Indeed, a recent systematic review and meta-analysis of longitudinal studies has  
292 shown that the prevalence of mental health problems was higher only at the beginning  
293 of the pandemic and continuously declined after 2 months<sup>39</sup>. In HCWs, the high  
294 prevalence of mental health problems at the beginning of the pandemic may be  
295 because of the sudden escalation of the workload and lack of understanding of the  
296 disease. At the later stage, as there are more information about the disease and HCWs  
297 have adapted to the new workload, the prevalence of mental health problems  
298 decreased<sup>40</sup>. However, note that most studies included in that review were from

1  
2  
3 299 countries where the peak of the first wave occurred at the beginning of the pandemic  
4  
5 300 and that there is a lack of studies conducted in the later period of the pandemic when  
6  
7 301 the number of cases surged again <sup>39, 40</sup>. In a single-center longitudinal study in Italy,  
8  
9 302 the prevalence of anxiety and stress remained high even during the third wave,  
10  
11 303 whereas the prevalence of depression increased from the first wave to the third wave  
12  
13 304 <sup>41</sup>. As the number of cases increases, the workload of the HCWs also increases. This  
14  
15 305 will negatively affect their mental health condition <sup>42, 43</sup>. In Indonesia, the peak of the  
16  
17 306 first wave occurred not at the beginning of the pandemic but during the data collection  
18  
19 307 of this study, that is, from December 2020 to February 2021 <sup>21</sup>. This explained the  
20  
21 308 higher prevalence of mental health problems in this study than in previous studies.  
22  
23  
24  
25  
26  
27  
28  
29  
30  
31  
32  
33  
34  
35  
36  
37  
38  
39  
40  
41  
42  
43  
44  
45  
46  
47  
48  
49  
50  
51  
52  
53  
54  
55  
56  
57  
58  
59  
60

310 Several studies were conducted during the same period as this study. Ménard et al  
311 (2022) have shown that the prevalence of depression, anxiety, and stress among  
312 Canadian HCWs was 14.4%, 21.8%, and 13.5%, respectively <sup>44</sup>. The lower  
313 prevalence in Canada might be explained by the difference in the healthcare systems.  
314 Different healthcare systems across countries can lead to differences in the prevalence  
315 of mental health problems among HCWs <sup>45</sup>. Unlike Canada, the capacity of the  
316 current Indonesia's healthcare system to respond to the COVID-19 pandemic is far  
317 from adequate <sup>46</sup>. Another study from Italia has revealed that the prevalence of  
318 depression, anxiety, and stress was 63%, 31%, and 80%, respectively <sup>41</sup>. The higher  
319 prevalence in that study might be explained by the difference in the study population  
320 where that study only included frontline HCWs (intensivist) caring exclusively for  
321 COVID-19 patients, whereas the HCWs in this study also treat non-COVID-19  
322 patients and some of them were not frontline HCWs. It has been shown previously

1  
2  
3 323 that frontline HCWs and those who worked in the intensive care unit during the  
4  
5 324 COVID-19 pandemic were more likely to develop mental health problems<sup>47, 48</sup>.

6  
7  
8 325

9  
10 326 In this study, the prevalence of depression, anxiety, and stress was higher in female  
11  
12 327 HCWs than that in male HCWs (**Supplementary Figure 1 and 2**). Moreover, the  
13  
14 328 female sex was an independent risk factor for depression and anxiety (**Table 3 and 4**).  
15  
16  
17 329 Similarly, other studies have also reported gender differences in mental health  
18  
19 330 problems among HCWs during the COVID-19 pandemic, where it is more prevalent  
20  
21 331 in female HCWs<sup>49, 50</sup>. This can be because females have higher rates of mood and  
22  
23 332 anxiety disorders due to a higher mean level of internalizing<sup>51</sup> and potentially by the  
24  
25 333 influence of sex hormones<sup>52</sup>.

26  
27  
28 334

29  
30 335 A recent study in Indonesia among nurses who worked during the COVID-19  
31  
32 336 pandemic has shown that rejection from family and/or neighbors is a risk factor for  
33  
34 337 depression, anxiety, and stress<sup>17</sup>. We also found a similar finding where intimidation  
35  
36 338 from society was a risk factor for depression, anxiety, and stress in the univariate  
37  
38 339 analysis (**Supplementary Tables 1, 2, and 3**). However, this variable lost its  
39  
40 340 significance in the multivariate analysis, whereas workplace support towards potential  
41  
42 341 intimidation was shown to lower the risk of depression, anxiety, and stress. This  
43  
44 342 indicates that the workplace environment plays a more substantial role in mental  
45  
46 343 health. Havaei et al. (2021) have found that negative ratings of workplace conditions  
47  
48 344 such as workplace relations, workplace safety, organizational support, and  
49  
50 345 preparedness were associated with poor mental health outcomes during the  
51  
52 346 COVID-19 pandemic<sup>53</sup>. A narrative review focusing on the mental health of HCWs  
53  
54 347 during the COVID-19 pandemic has also stated that intrinsic high-risk professional,  
55  
56  
57  
58  
59  
60

1  
2  
3 348 organizational factors such as lack of workplace support, and vulnerable workers such  
4  
5 349 as frontline HCWs are at a higher risk of mental issues during the pandemic <sup>54</sup>.  
6  
7  
8 350

9  
10 351 HRQoL

11  
12 352 To this date, many established questionnaires can be used to assess HRQoL. In  
13  
14 353 previously published studies on HRQoL among HCWs during the COVID-19  
15  
16 354 pandemic, several HRQoL questionnaires were used, that is, WHOQOL-BREF <sup>23, 27, 29</sup>,  
17  
18 355 EQ-5D <sup>30, 31</sup>, SF36 <sup>24</sup>, and SF12 <sup>28</sup>. Since we used the SF12v2 to evaluate HRQoL in  
19  
20 356 this study, we argue that comparing our findings with those of previous studies that  
21  
22 357 have used either the SF12 or SF36 is essential. The PCS and MCS scores in previous  
23  
24 358 studies were higher than those in this study <sup>24, 28</sup>, indicating that HRQoL in previous  
25  
26 359 studies was better. Moreover, we found that 39.8% of the HCWs included in this  
27  
28 360 study had an impairment in the mental component and 90.3% had an impairment in  
29  
30 361 the physical component. However, we cannot compare our findings with those of  
31  
32 362 previous studies since they did not present the prevalence of HCWs with impaired  
33  
34 363 physical and mental health components <sup>24, 28</sup>.  
35  
36  
37  
38  
39  
40  
41

42 365 The worse HRQoL in this study might be caused by the time difference of the study  
43  
44 366 period where previous studies were conducted at the beginning of the pandemic and  
45  
46 367 this study was conducted in the later time of the pandemic <sup>24, 28</sup>. Similar to the mental  
47  
48 368 health status, we would argue that the HRQoL of HCWs at the beginning of the  
49  
50 369 pandemic was not as affected as that at the later period. The number of COVID-19  
51  
52 370 patients at the later period was significantly higher than at the beginning of the  
53  
54 371 pandemic <sup>6</sup>. This increased number of patients will increase the workload of HCWs,  
55  
56 372 even if the working hour is not prolonged. Over time, increasing workload will lead to  
57  
58  
59  
60

1  
2  
3 373 physical exhaustion of HCWs. Moreover, the number of deaths of COVID-19 patients  
4  
5 374 increases over time. Constant exposure to dealing with dying and death, in addition to  
6  
7  
8 375 the high workload, is considered as an occupational stressor<sup>55, 56</sup>.

9  
10 376

### 11 12 377 **Study limitations**

13  
14 378 This study has some limitations to consider. First, the study design was  
15  
16  
17 379 cross-sectional study, whereas the prevalence of mental health problems during the  
18  
19 380 COVID-19 pandemic is dynamic. Second, as the sampling technique used in this  
20  
21  
22 381 study was nonprobability purposive snowball sampling and that only those who had  
23  
24 382 internet access and spare time can enroll in this study, this study was prone to  
25  
26 383 selection bias. Furthermore, although the number of respondents in this study had  
27  
28 384 surpassed the minimum required number of samples, the number of respondents was  
29  
30  
31 385 small compared with the total number of HCWs in Indonesia. Therefore,  
32  
33 386 generalization of this study's findings to all HCWs in Indonesia should be done  
34  
35 387 cautiously. Third, the respondents were not only frontline HCWs but also second-line  
36  
37  
38 388 HCWs, and they worked not only in COVID-19 hospitals but also in other healthcare  
39  
40 389 sectors. This may underestimate the prevalence of mental health problems. Fourth, the  
41  
42 390 diagnosis of depression, anxiety, stress, and HRQoL impairment in this study was  
43  
44 391 based on self-reported questionnaires. This may also underestimate the prevalence of  
45  
46  
47 392 mental health problems. Fifth, 78 (16%) respondents accessed the online  
48  
49 393 questionnaire but did not finish it. The possible explanation for this high loss is  
50  
51 394 because it takes quite a long time (approximately 15–20 minutes) to complete the  
52  
53  
54 395 questionnaire.

1  
2  
3 396 **Conclusion**  
4

5 397 This is the first study that evaluated the prevalence of and determinants for both  
6  
7 398 mental health status and HRQoL during the COVID-19 pandemic in Indonesia. The  
8  
9  
10 399 prevalence of depression, anxiety, and stress among HCWs was 29.4%, 44.9%, and  
11  
12 400 31.8%, respectively, whereas the prevalence of impaired HRQoL was 90.3% for PCS  
13  
14 401 and 39.8% for MCS. The results of this study suggest that the workplace environment  
15  
16 402 is where interventions to prevent and mitigate mental issues are most needed.  
17  
18 403 Additionally, more attention is also needed for female HCWs, since female HCWs are  
19  
20 404 at a higher risk of developing mental health issues. Based on our findings, we  
21  
22 405 recommend that more attention towards HCWs should be given by the policymakers  
23  
24 406 in Indonesia. This can be done by providing psychological support and also by  
25  
26 407 assigning sufficient number of security guards or polices in healthcare facilities in  
27  
28 408 order to provide safer workplace. Studies with larger sample sizes and periodical  
29  
30 409 evaluation may further contribute to adequately monitor the mental health and  
31  
32 410 HRQoL of HCWs throughout this pandemic and develop corresponding support and  
33  
34 411 interventions.  
35  
36  
37  
38  
39  
40  
41  
42  
43  
44  
45  
46  
47  
48  
49  
50  
51  
52  
53  
54  
55  
56  
57  
58  
59  
60

414 **Contributions:** ATS, SS, FFA, MK, MJP, FDP, and BA were involved in the  
415 conceptualization and the design of the study. ATS, SS, FFA, YEP, MK, AK, and BA  
416 carried out the data collection. SS, FFA, and AI conducted the analysis, and FDP, and  
417 BA were the main consultants in the data interpretation. ATS, SS, FFA, and AI  
418 drafted the manuscript, and all the authors revised it. All authors read and approved  
419 the final manuscript to be submitted.

1  
2  
3 420 **Funding:** This research received no specific grant from any funding agency in the  
4  
5 421 public, commercial or not-for-profit sectors.  
6

7  
8 422 **Competing interests:** MJP received grants and honoraria from various  
9  
10 423 pharmaceutical companies, all fully unrelated to this research. Other authors have no  
11  
12 424 conflict of interest to declare.  
13

14  
15 425 **Ethics approval:** Approval was granted by the Institutional Review Board of Faculty  
16  
17 426 of Medicine Universitas Airlangga (Date 5 October 2020 / No.  
18  
19 427 251/EC/KEPK/FKUA/2020).  
20

21  
22 428 **Acknowledgement:** The authors would like to thank QualityMetric Incorporated,  
23  
24 429 LLC for giving a free SF12v2® licensing package for this study.  
25

26 430 **Data sharing statement:** Data are available upon reasonable request.  
27  
28  
29  
30  
31  
32  
33  
34  
35  
36  
37  
38  
39  
40  
41  
42  
43  
44  
45  
46  
47  
48  
49  
50  
51  
52  
53  
54  
55  
56  
57  
58  
59  
60



431 **References**

- 432 1. Khan S, Siddique R, Bai Q, Shabana, Liu Y, Xue M, et al. Coronaviruses disease 2019 (COVID-19):  
433 Causative agent, mental health concerns, and potential management options. *Journal of infection and*  
434 *public health*. 2020;13(12):1840-4.
- 435 2. Fauci AS, Lane HC, Redfield RR. Covid-19 - Navigating the Uncharted. *The New England journal of*  
436 *medicine*. 2020;382(13):1268-9.
- 437 3. World Health Organization. Rolling updates on coronavirus disease (COVID-19) 2020 [updated 31  
438 July 2020. Available from:  
439 <https://www.who.int/emergencies/diseases/novel-coronavirus-2019/events-as-they-happen>.
- 440 4. World Health Organization. WHO Coronavirus (COVID-19) Dashboard 2022 [updated 24 February  
441 2022. Available from: <https://covid19.who.int/>.
- 442 5. World Health Organization Indonesia. Coronavirus Disease 2019 (COVID-19) Situation Report - 1  
443 2020 [updated 27 March 2020. Available from:  
444 <https://www.who.int/indonesia/news/novel-coronavirus/situation-reports>.
- 445 6. World Health Organization Indonesia. Coronavirus Disease 2019 (COVID-19) Situation Report - 87  
446 2022 [updated 16 February 2022. Available from:  
447 <https://www.who.int/indonesia/news/novel-coronavirus/situation-reports>.
- 448 7. World Health Organization. Director-General's opening remarks at the World Health Assembly -  
449 24 May 2021 2021 [updated 24 May 2021. Available from:  
450 <https://www.who.int/director-general/speeches/detail/director-general-s-opening-remarks-at-the-w>  
451 [orld-health-assembly---24-may-2021](https://www.who.int/director-general/speeches/detail/director-general-s-opening-remarks-at-the-w).
- 452 8. Lapor Covid-19. Pusara Digital Tenaga Kesehatan Indonesia. 2022 [updated 25 February 2022.  
453 Available from: <https://nakes.laporcovid19.org/>.
- 454 9. Bandyopadhyay S, Baticulon RE, Kadhum M, Alser M, Ojuka DK, Badereddin Y, et al. Infection  
455 and mortality of healthcare workers worldwide from COVID-19: a systematic review. *BMJ global*  
456 *health*. 2020;5(12).
- 457 10. Diez-Manglano J, Solis-Marquinez MN, Alvarez Garcia A, Alcala-Rivera N, Maderuelo Riesco I,  
458 Gerico Aseguinolaza M, et al. Healthcare workers hospitalized due to COVID-19 have no higher risk of  
459 death than general population. Data from the Spanish SEMI-COVID-19 Registry. *PLoS one*.  
460 2021;16(2):e0247422.
- 461 11. Vindegaard N, Benros ME. COVID-19 pandemic and mental health consequences: Systematic  
462 review of the current evidence. *Brain, behavior, and immunity*. 2020;89:531-42.
- 463 12. De Kock JH, Latham HA, Leslie SJ, Grindle M, Munoz SA, Ellis L, et al. A rapid review of the impact  
464 of COVID-19 on the mental health of healthcare workers: implications for supporting psychological  
465 well-being. *BMC public health*. 2021;21(1):104.
- 466 13. Saragih ID, Tonapa SI, Saragih IS, Advani S, Batubara SO, Suarilah I, et al. Global prevalence of  
467 mental health problems among healthcare workers during the Covid-19 pandemic: A systematic  
468 review and meta-analysis. *Int J Nurs Stud*. 2021;121:104002.
- 469 14. Weaver MD, Vetter C, Rajaratnam SMW, O'Brien CS, Qadri S, Benca RM, et al. Sleep disorders,  
470 depression and anxiety are associated with adverse safety outcomes in healthcare workers: A  
471 prospective cohort study. *J Sleep Res*. 2018;27(6):e12722.
- 472 15. Salari N, Khazaie H, Hosseinian-Far A, Khaledi-Paveh B, Kazeminia M, Mohammadi M, et al. The  
473 prevalence of stress, anxiety and depression within front-line healthcare workers caring for COVID-19  
474 patients: a systematic review and meta-regression. *Hum Resour Health*. 2020;18(1):100.
- 475 16. Chew NWS, Ngiam JN, Tan BY, Tham SM, Tan CY, Jing M, et al. Asian-Pacific perspective on the  
476 psychological well-being of healthcare workers during the evolution of the COVID-19 pandemic.  
477 *BJPsych Open*. 2020;6(6):e116.
- 478 17. Marthoenis, Maskur, Fathiariani L, Nassimbwa J. Investigating the burden of mental distress  
479 among nurses at a provincial COVID-19 referral hospital in Indonesia: a cross-sectional study. *BMC*  
480 *Nurs*. 2021;20(1):76.
- 481 18. Setiawati Y, Wahyuhadi J, Joestandari F, Maramis MM, Atika A. Anxiety and Resilience of  
482 Healthcare Workers During COVID-19 Pandemic in Indonesia. *Journal of multidisciplinary healthcare*.  
483 2021;14:1-8.
- 484 19. Sitanggang FP, Wirawan GBS, Wirawan IMA, Lesmana CBJ, Januraga PP. Determinants of Mental  
485 Health and Practice Behaviors of General Practitioners During COVID-19 Pandemic in Bali, Indonesia:  
486 A Cross-sectional Study. *Risk Manag Healthc Policy*. 2021;14:2055-64.

1  
2  
3  
4  
5  
6  
7  
8  
9  
10  
11  
12  
13  
14  
15  
16  
17  
18  
19  
20  
21  
22  
23  
24  
25  
26  
27  
28  
29  
30  
31  
32  
33  
34  
35  
36  
37  
38  
39  
40  
41  
42  
43  
44  
45  
46  
47  
48  
49  
50  
51  
52  
53  
54  
55  
56  
57  
58  
59  
60

- 487 20. Sunjaya DK, Herawati DMD, Siregar AYM. Depressive, anxiety, and burnout symptoms on health  
488 care personnel at a month after COVID-19 outbreak in Indonesia. *BMC public health*. 2021;21(1):227.
- 489 21. World Health Organization Indonesia. Coronavirus Disease 2019 (COVID-19) Situation Report - 86  
490 2022 [updated 19 January 2022. Available from:  
491 [https://cdn.who.int/media/docs/default-source/searo/indonesia/covid19/external-situation-report-86-19-january-2022.pdf?sfvrsn=7db37ea6\\_5](https://cdn.who.int/media/docs/default-source/searo/indonesia/covid19/external-situation-report-86-19-january-2022.pdf?sfvrsn=7db37ea6_5).  
492
- 493 22. Melo-Oliveira ME, Sa-Caputo D, Bachur JA, Paineiras-Domingos LL, Sonza A, Lacerda AC, et al.  
494 Reported quality of life in countries with cases of COVID19: a systematic review. *Expert review of*  
495 *respiratory medicine*. 2021;15(2):213-20.
- 496 23. Woon LS, Mansor NS, Mohamad MA, Teoh SH, Leong Bin Abdullah MFI. Quality of Life and Its  
497 Predictive Factors Among Healthcare Workers After the End of a Movement Lockdown: The Salient  
498 Roles of COVID-19 Stressors, Psychological Experience, and Social Support. *Frontiers in psychology*.  
499 2021;12:652326.
- 500 24. Stojanov J, Malobabic M, Stanojevic G, Stevic M, Milosevic V, Stojanov A. Quality of sleep and  
501 health-related quality of life among health care professionals treating patients with coronavirus  
502 disease-19. *The International journal of social psychiatry*. 2020:20764020942800.
- 503 25. Celmece N, Menekay M. The Effect of Stress, Anxiety and Burnout Levels of Healthcare  
504 Professionals Caring for COVID-19 Patients on Their Quality of Life. *Frontiers in psychology*.  
505 2020;11:597624.
- 506 26. Suryavanshi N, Kadam A, Dhumal G, Nimkar S, Mave V, Gupta A, et al. Mental health and quality  
507 of life among healthcare professionals during the COVID-19 pandemic in India. *Brain and behavior*.  
508 2020;10(11):e01837.
- 509 27. da Costa Matos RA, Akutsu R, Zandonadi RP, Botelho RBA. Quality of Life Prior and in the Course  
510 of the COVID-19 Pandemic: A Nationwide Cross-Sectional Study with Brazilian Dietitians. *International*  
511 *journal of environmental research and public health*. 2021;18(5).
- 512 28. Amerio A, Bianchi D, Santi F, Costantini L, Odone A, Signorelli C, et al. Covid-19 pandemic impact  
513 on mental health: a web-based cross-sectional survey on a sample of Italian general practitioners.  
514 *Acta bio-medica : Atenei Parmensis*. 2020;91(2):83-8.
- 515 29. An Y, Yang Y, Wang A, Li Y, Zhang Q, Cheung T, et al. Prevalence of depression and its impact on  
516 quality of life among frontline nurses in emergency departments during the COVID-19 outbreak.  
517 *Journal of affective disorders*. 2020;276:312-5.
- 518 30. Manh Than H, Minh Nong V, Trung Nguyen C, Phu Dong K, Ngo HT, Thu Doan T, et al. Mental  
519 Health and Health-Related Quality-of-Life Outcomes Among Frontline Health Workers During the  
520 Peak of COVID-19 Outbreak in Vietnam: A Cross-Sectional Study. *Risk management and healthcare*  
521 *policy*. 2020;13:2927-36.
- 522 31. Martín J, Padierna Á, Villanueva A, Quintana JM. Evaluation of the mental health of health  
523 professionals in the COVID-19 era. What mental health conditions are our health care workers facing  
524 in the new wave of coronavirus? *International Journal of Clinical Practice*.n/a(n/a):e14607.
- 525 32. Laws of The Republic of Indonesia on Healthcare Workers, 36 (2014).
- 526 33. Dean AG, Arner TG, Sunki GG, Friedman R, Lantinga M, Sangam S, et al. *Epi Info™*, a database  
527 and statistics program for public health professionals. Atlanta, GA: CDC; 2011.
- 528 34. Lovibond SH, Lovibond PF. *Manual for the Depression Anxiety Stress Scales*. 2nd ed. Sydney,  
529 Australia: Psychology Foundation; 1995.
- 530 35. El-Matury HJ, Lestari FA, Besral. Depression, anxiety and stress among undergraduate students  
531 in jakarta: Examining scores of the depression anxiety and stress scale according to origin and  
532 residency. *Indian Journal of Public Health Research and Development*. 2018;9(2):290-5.
- 533 36. Maruish ME. *User's manual for the SF-12v2 Health Survey*. 3rd ed. Lincoln, RI: QualityMetric  
534 Incorporated; 2012.
- 535 37. Wicaksana AL, Maharani E, Hertanti NS. The Indonesian version of the Medical Outcome Survey -  
536 Short Form 12 version 2 among patients with cardiovascular diseases. *International Journal of Nursing*  
537 *Practice*. 2020;26(2):e12804.
- 538 38. Flynn J, Alkaff FF, Sukmajaya WP, Salamah S. Comparison of WHO growth standard and national  
539 Indonesian growth reference in determining prevalence and determinants of stunting and  
540 underweight in children under five: a cross-sectional study from Musi sub-district. *F1000Res*.  
541 2020;9:324.

- 1  
2  
3 542 39. Robinson E, Sutin AR, Daly M, Jones A. A systematic review and meta-analysis of longitudinal  
4 543 cohort studies comparing mental health before versus during the COVID-19 pandemic in 2020.  
5 544 *Journal of affective disorders*. 2022;296:567-76.  
6 545 40. Liu X, Zhu M, Zhang R, Zhang J, Zhang C, Liu P, et al. Public mental health problems during  
7 546 COVID-19 pandemic: a large-scale meta-analysis of the evidence. *Transl Psychiatry*. 2021;11(1):384.  
8 547 41. Magnavita N, Soave PM, Antonelli M. A One-Year Prospective Study of Work-Related Mental  
9 548 Health in the Intensivists of a COVID-19 Hub Hospital. *International journal of environmental research  
10 549 and public health*. 2021;18(18).  
11 550 42. Peng R, Zhou W, Zhou D, Chu M, Ling L. The Mediating Role of Fatigue Between Mental Health  
12 551 and Its Associated Factors: Evidence From Chinese Healthcare Workers During the COVID-19  
13 552 Pandemic. *Front Psychiatry*. 2021;12:665992.  
14 553 43. Tiete J, Guatteri M, Lachaux A, Matossian A, Hougardy JM, Loas G, et al. Mental Health  
15 554 Outcomes in Healthcare Workers in COVID-19 and Non-COVID-19 Care Units: A Cross-Sectional Survey  
16 555 in Belgium. *Frontiers in psychology*. 2020;11:612241.  
17 556 44. Menard AD, Soucie K, Freeman LA, Ralph JL. "My problems aren't severe enough to seek help":  
18 557 Stress levels and use of mental health supports by Canadian hospital employees during the COVID-19  
19 558 pandemic. *Health Policy*. 2022;126(2):106-11.  
20 559 45. Uphoff EP, Lombardo C, Johnston G, Weeks L, Rodgers M, Dawson S, et al. Mental health among  
21 560 healthcare workers and other vulnerable groups during the COVID-19 pandemic and other  
22 561 coronavirus outbreaks: A rapid systematic review. *PloS one*. 2021;16(8):e0254821.  
23 562 46. Mahendradhata Y, Andayani N, Hasri ET, Arifi MD, Siahaan RGM, Solikha DA, et al. The Capacity  
24 563 of the Indonesian Healthcare System to Respond to COVID-19. *Front Public Health*. 2021;9:649819.  
25 564 47. Wozniak H, Benzakour L, Moullec G, Buetti N, Nguyen A, Corbaz S, et al. Mental health outcomes  
26 565 of ICU and non-ICU healthcare workers during the COVID-19 outbreak: a cross-sectional study. *Ann  
27 566 Intensive Care*. 2021;11(1):106.  
28 567 48. Hao Q, Wang D, Xie M, Tang Y, Dou Y, Zhu L, et al. Prevalence and Risk Factors of Mental Health  
29 568 Problems Among Healthcare Workers During the COVID-19 Pandemic: A Systematic Review and  
30 569 Meta-Analysis. *Front Psychiatry*. 2021;12:567381.  
31 570 49. Liu S, Yang L, Zhang C, Xu Y, Cai L, Ma S, et al. Gender differences in mental health problems of  
32 571 healthcare workers during the coronavirus disease 2019 outbreak. *J Psychiatr Res*. 2021;137:393-400.  
33 572 50. De Sio S, Buomprisco G, La Torre G, Lapteva E, Perri R, Greco E, et al. The impact of COVID-19 on  
34 573 doctors' well-being: results of a web survey during the lockdown in Italy. *Eur Rev Med Pharmacol Sci*.  
35 574 2020;24(14):7869-79.  
36 575 51. Eaton NR, Keyes KM, Krueger RF, Balsis S, Skodol AE, Markon KE, et al. An invariant dimensional  
37 576 liability model of gender differences in mental disorder prevalence: evidence from a national sample.  
38 577 *J Abnorm Psychol*. 2012;121(1):282-8.  
39 578 52. Li SH, Graham BM. Why are women so vulnerable to anxiety, trauma-related and stress-related  
40 579 disorders? The potential role of sex hormones. *Lancet Psychiatry*. 2017;4(1):73-82.  
41 580 53. Havaei F, Ma A, Staempfli S, MacPhee M. Nurses' Workplace Conditions Impacting Their Mental  
42 581 Health during COVID-19: A Cross-Sectional Survey Study. *Healthcare (Basel)*. 2021;9(1).  
43 582 54. Giorgi G, Lecca LI, Alessio F, Finstad GL, Bondanini G, Lulli LG, et al. COVID-19-Related Mental  
44 583 Health Effects in the Workplace: A Narrative Review. *Int J Environ Res Public Health*. 2020;17(21).  
45 584 55. Gray-Toft P, Anderson JG. The Nursing Stress Scale: Development of an instrument. *Journal of  
46 585 behavioral assessment*. 1981;3(1):11-23.  
47 586 56. Sjoberg A, Pettersson-Stromback A, Sahlen KG, Lindholm L, Norstrom F. The burden of high  
48 587 workload on the health-related quality of life among home care workers in Northern Sweden. *Int Arch  
49 588 Occup Environ Health*. 2020;93(6):747-64.  
50 589  
51 590

1  
2  
3 591 **Figure legends**  
4

5 592 **Figure 1.** Flow diagram of study participants.  
6

7  
8 593 **Figure 2.** Prevalence of depression, anxiety, and stress among healthcare workers in  
9  
10 594 each severity level according to DASS-21 scores.  
11

12 595 **Figure 3.** The median [interquartile range] norm-based T-score of summary scores  
13  
14 596 and each health domain scale.  
15

16  
17 597 **Figure 4.** The prevalence of impairment in physical and mental components in  
18  
19 598 general and each health domain scale among healthcare workers. PCS, physical  
20  
21 599 component summary; MCS, mental component summary; PF, physical function; RP,  
22  
23 600 role physical; BP, bodily pain; GH, general health; VT, vitality; SF, social functioning;  
24  
25 601 RE, role emotional; MH, mental health.  
26  
27  
28  
29  
30  
31  
32  
33  
34  
35  
36  
37  
38  
39  
40  
41  
42  
43  
44  
45  
46  
47  
48  
49  
50  
51  
52  
53  
54  
55  
56  
57  
58  
59  
60

**Tables****Table 1.** Cut-off score for mental health status categorization

|            | Normal | Mild  | Moderate | Severe | Extremely<br>impaired |
|------------|--------|-------|----------|--------|-----------------------|
| Depression | 0–9    | 10–12 | 13–20    | 21–27  | 28–42                 |
| Anxiety    | 0–6    | 7–9   | 10–14    | 15–19  | 20–42                 |
| Stress     | 0–10   | 11–18 | 19–26    | 27–34  | 25–42                 |

**Table 2.** Sociodemographic characteristics of the respondents (N = 392)

| <b>Variables</b>                                                                                | <b>n (%)</b> |
|-------------------------------------------------------------------------------------------------|--------------|
| <b>Age in years, mean ± SD</b>                                                                  | 33.5 ± 9.4   |
| <b>Sex</b>                                                                                      |              |
| Male                                                                                            | 127 (32.4)   |
| Female                                                                                          | 265 (67.6)   |
| <b>Marital status</b>                                                                           |              |
| Single                                                                                          | 146 (37.2)   |
| Married                                                                                         | 128 (32.7)   |
| Married with children                                                                           | 118 (30.1)   |
| <b>Job</b>                                                                                      |              |
| Nurse                                                                                           | 52 (13.3)    |
| Midwife                                                                                         | 19 (4.9)     |
| Doctor                                                                                          | 227 (57.9)   |
| Dentist                                                                                         | 26 (6.6)     |
| Pharmacist                                                                                      | 20 (5.1)     |
| Others (nutritionist, physiotherapist, laboratory analyst, acupuncturist, and health educators) | 48 (12.2)    |
| <b>Workplace setting</b>                                                                        |              |
| COVID-19 hospital or COVID-19 referral hospital                                                 | 160 (40.8)   |
| Non-COVID-19 hospital                                                                           | 76 (19.4)    |
| Primary care facilities                                                                         | 138 (35.2)   |
| Other healthcare facilities                                                                     | 18 (4.6)     |
| <b>Workplace island</b>                                                                         |              |
| Java Island                                                                                     | 296 (75.5)   |
| Outside Java Island                                                                             | 96 (24.5)    |
| <b>Working period during the COVID-19 pandemic</b>                                              |              |
| Since the beginning of the pandemic (March–April 2020)                                          | 310 (79.1)   |
| In the middle of the pandemic (May 2020 or later)                                               | 82 (20.9)    |
| <b>Working experience before the COVID-19 pandemic</b>                                          |              |
| Not working                                                                                     | 36 (9.2)     |
| <1 year                                                                                         | 67 (17.1)    |
| 1–3 years                                                                                       | 92 (23.5)    |
| >3 years                                                                                        | 197 (50.2)   |
| <b>Income during the COVID-19 pandemic</b>                                                      |              |
| <3 million rupiah/month                                                                         | 77 (19.7)    |
| 3–5 million rupiah/month                                                                        | 107 (27.3)   |
| 5–10 million rupiah/month                                                                       | 111 (28.3)   |
| 10–20 million rupiah/month                                                                      | 51 (13.0)    |
| >20 million rupiah/month                                                                        | 46 (11.7)    |
| <b>Working hours per week during the COVID-19 pandemic</b>                                      |              |
| <40 hours/week                                                                                  | 180 (45.9)   |
| 40–60 hours/week                                                                                | 181 (46.2)   |
| >60 hours/week                                                                                  | 31 (7.9)     |
| <b>History of COVID-19 infection</b>                                                            |              |
| Yes                                                                                             | 57 (14.5)    |
| No                                                                                              | 335 (85.5)   |
| <b>History of COVID-19 infection in the family</b>                                              |              |
| Yes                                                                                             | 118 (30.1)   |
| No                                                                                              | 274 (69.9)   |

**Any family member died because of COVID-19**

|     |            |
|-----|------------|
| Yes | 25 (6.4)   |
| No  | 367 (93.6) |

**Having one or more comorbidities**

|     |            |
|-----|------------|
| Yes | 276 (70.4) |
| No  | 116 (29.6) |

**PPE availability in the workplace**

|                                            |            |
|--------------------------------------------|------------|
| Not available or not according to standard | 134 (34.2) |
| Available and according to standard        | 258 (65.8) |

**Free routine COVID-19 PCR swab test for HCWs**

|                                |            |
|--------------------------------|------------|
| No                             | 177 (45.1) |
| Only if there are any symptoms | 194 (49.5) |
| Routinely 1–3 times a month    | 20 (5.1)   |
| At least once a week           | 1 (0.3)    |

**Verbal intimidation in the workplace**

|                        |            |
|------------------------|------------|
| Never                  | 243 (62.0) |
| Less than once a month | 84 (21.4)  |
| 1–4 times a month      | 49 (12.5)  |
| More than once a week  | 16 (4.1)   |

**Physical intimidation in the workplace**

|                        |            |
|------------------------|------------|
| Never                  | 379 (96.7) |
| Less than once a month | 8 (2.0)    |
| 1–4 times a month      | 3 (0.8)    |
| More than once a week  | 2 (0.5)    |

**Intimidation from the society outside the workplace**

|                        |            |
|------------------------|------------|
| Never                  | 285 (72.7) |
| Less than once a month | 77 (19.7)  |
| 1–4 times a month      | 26 (6.6)   |
| More than once a week  | 4 (1.0)    |

**Workplace support from intimidation**

|     |            |
|-----|------------|
| Yes | 322 (82.1) |
| No  | 70 (17.9)  |

**How the workplace treats HCWs with COVID-19 symptoms**

|                                                                     |            |
|---------------------------------------------------------------------|------------|
| Do not know                                                         | 21 (5.3)   |
| HCWs are not allowed to come to work until the test result came out | 306 (78.1) |
| HCWs still come to work until the test result came out              | 65 (16.6)  |

**HCWs' salary if they are infected with COVID-19**

|                                      |            |
|--------------------------------------|------------|
| Do not know                          | 136 (34.7) |
| Reduced by the number of the absence | 67 (17.1)  |
| Full payment                         | 189 (48.2) |

**Willingness to work during the COVID-19 pandemic**

|     |            |
|-----|------------|
| Yes | 330 (84.2) |
| No  | 62 (15.8)  |

**Reason for HCWs to work during the COVID-19 pandemic**

|                                 |            |
|---------------------------------|------------|
| Feeling responsible             | 285 (72.7) |
| Financial matters               | 88 (22.4)  |
| Already bound to work contracts | 36 (9.2)   |

---

COVID-19, coronavirus disease 2019; HCWs, healthcare workers; PPE, personal protective equipment; PCR, polymerase chain reaction.



**Table 3.** Determinants of depression among healthcare workers (N = 392)

| Variables                                                                           | <i>p</i> value | aOR   | 95%CI         |
|-------------------------------------------------------------------------------------|----------------|-------|---------------|
| <b>Sex</b>                                                                          |                |       |               |
| Male (ref)                                                                          | -              | -     | -             |
| Female                                                                              | .033           | 1.777 | 1.048 – 3.013 |
| <b>Working experience before the COVID-19 pandemic</b>                              |                |       |               |
| Not working (ref)                                                                   | -              | -     | -             |
| <1 year                                                                             | .801           | 0.893 | 0.369 – 2.162 |
| 1-3 years                                                                           | .560           | 1.283 | 0.554 – 2.969 |
| >3 years                                                                            | .008           | 0.333 | 0.147 – 0.753 |
| <b>Workplace support from intimidation</b>                                          |                |       |               |
| Yes (ref)                                                                           | -              | -     | -             |
| No                                                                                  | .002           | 2.493 | 1.383 – 4.494 |
| <b>Work during the COVID-19 pandemic because already bound to working contracts</b> |                |       |               |
| Yes                                                                                 | .015           | 2.578 | 1.198 – 5.547 |
| No (ref)                                                                            | -              | -     | -             |

*p* values < .05 were considered statistically significant. aOR, adjusted odds ratio; COVID-19, coronavirus disease 2019; CI, confidence interval.



**Table 4.** Determinants of anxiety among healthcare workers (N = 392)

| <b>Variables</b>                                        | <b>p value</b> | <b>aOR</b> | <b>95%CI</b>  |
|---------------------------------------------------------|----------------|------------|---------------|
| <b>Age</b>                                              | < .001         | 0.938      | 0.913 – 0.964 |
| <b>Sex</b>                                              |                |            |               |
| Male (ref)                                              | -              | -          | -             |
| Female                                                  | .010           | 1.874      | 1.163 – 3.021 |
| <b>Workplace setting</b>                                |                |            |               |
| COVID-19 hospital or referral hospital (ref)            | -              | -          | -             |
| Non-COVID-19 hospital                                   | .001           | 0.356      | 0.189 – 0.669 |
| Primary care or other healthcare facilities             | .029           | 0.574      | 0.348 – 0.946 |
| <b>Workplace support from intimidation</b>              |                |            |               |
| Yes (ref)                                               | -              | -          | -             |
| No                                                      | .017           | 2.099      | 1.143 – 3.854 |
| <b>Willingness to work during the COVID-19 pandemic</b> |                |            |               |
| Yes (ref)                                               | -              | -          | -             |
| No                                                      | .016           | 2.154      | 1.157 – 4.012 |

*p* values < .05 were considered statistically significant. aOR, adjusted odds ratio; COVID-19, coronavirus disease 2019; CI, confidence interval.

**Table 5.** Determinants of stress among healthcare workers (N = 392)

| <b>Variables</b>                                                               | <b>p value</b> | <b>aOR</b> | <b>95%CI</b>   |
|--------------------------------------------------------------------------------|----------------|------------|----------------|
| <b>Age</b>                                                                     | .001           | 0.956      | 0.930 – 0.983  |
| <b>Workplace support from intimidation</b>                                     |                |            |                |
| Yes (ref)                                                                      | -              | -          | -              |
| No                                                                             | .014           | 2.043      | 1.154 – 3.616  |
| <b>Willingness to work during COVID-19 pandemic</b>                            |                |            |                |
| Yes (ref)                                                                      | -              | -          | -              |
| No                                                                             | .014           | 2.169      | 1.168 – 4.027  |
| <b>Work during COVID-19 pandemic because of financial matters</b>              |                |            |                |
| Yes                                                                            | .014           | 3.575      | 1.293 – 9.885  |
| No (ref)                                                                       | -              | -          | -              |
| <b>Work during COVID-19 pandemic because already bound to working contract</b> |                |            |                |
| Yes                                                                            | .014           | 4.352      | 1.340 – 14.137 |
| No (ref)                                                                       | -              | -          | -              |

*p* values < .05 were considered statistically significant. aOR, adjusted odds ratio; COVID-19, coronavirus disease 2019; CI, confidence interval.



Figure 1

512x270mm (130 x 130 DPI)

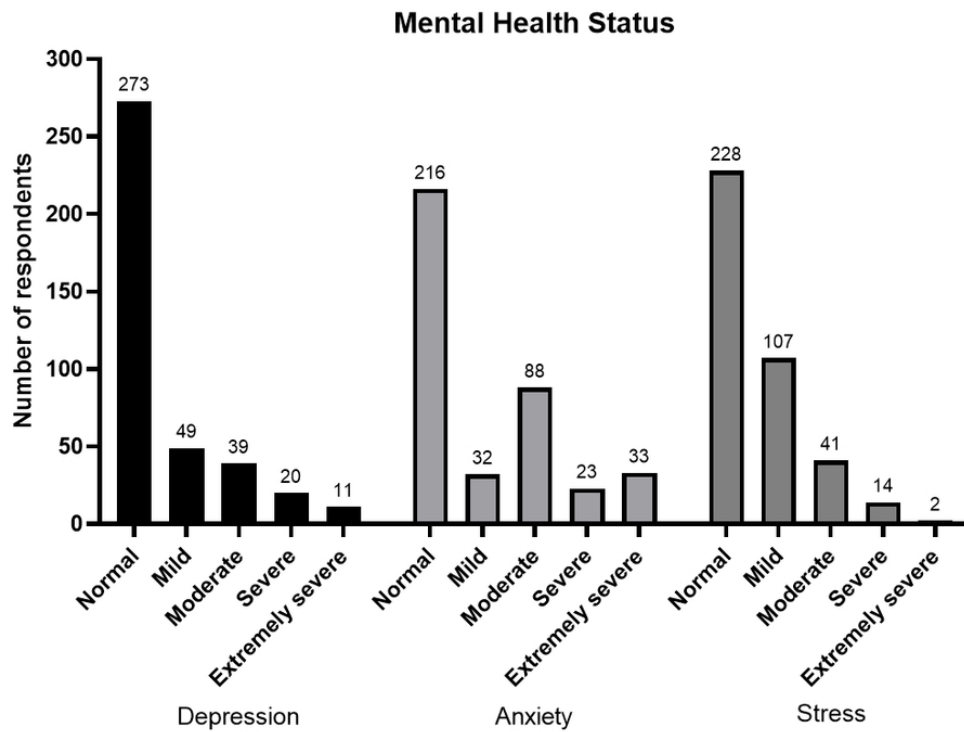

Figure 2

78x59mm (300 x 300 DPI)

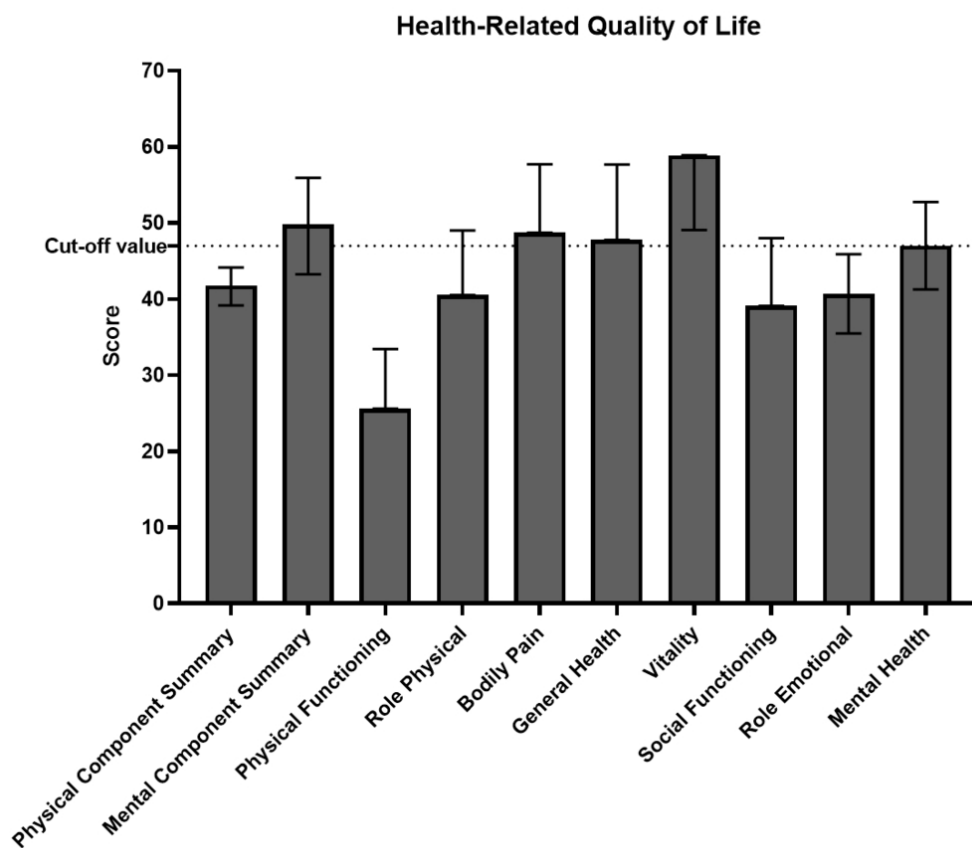

Figure 3

85x74mm (300 x 300 DPI)

1  
2  
3  
4  
5  
6  
7  
8  
9  
10  
11  
12  
13  
14  
15  
16  
17  
18  
19  
20  
21  
22  
23  
24  
25  
26  
27  
28  
29  
30  
31  
32  
33  
34  
35  
36  
37  
38  
39  
40  
41  
42  
43  
44  
45  
46  
47  
48  
49  
50  
51  
52  
53  
54  
55  
56  
57  
58  
59  
60

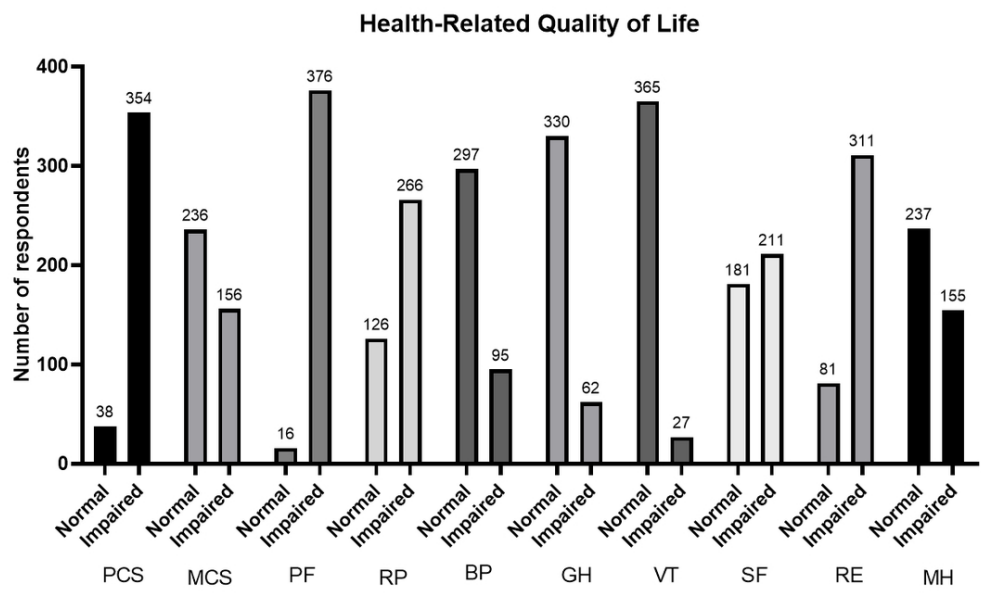

Figure 4

91x56mm (300 x 300 DPI)

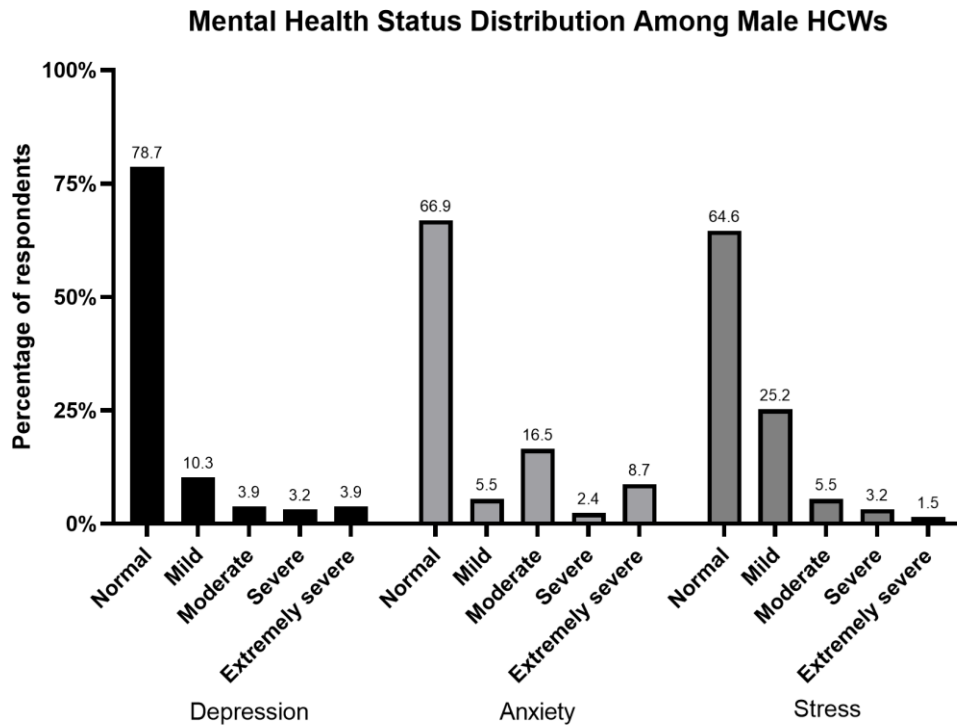

**Supplementary figure 1.** Prevalence of depression, anxiety, and stress among male healthcare workers in each severity level according to DASS-21 scores.

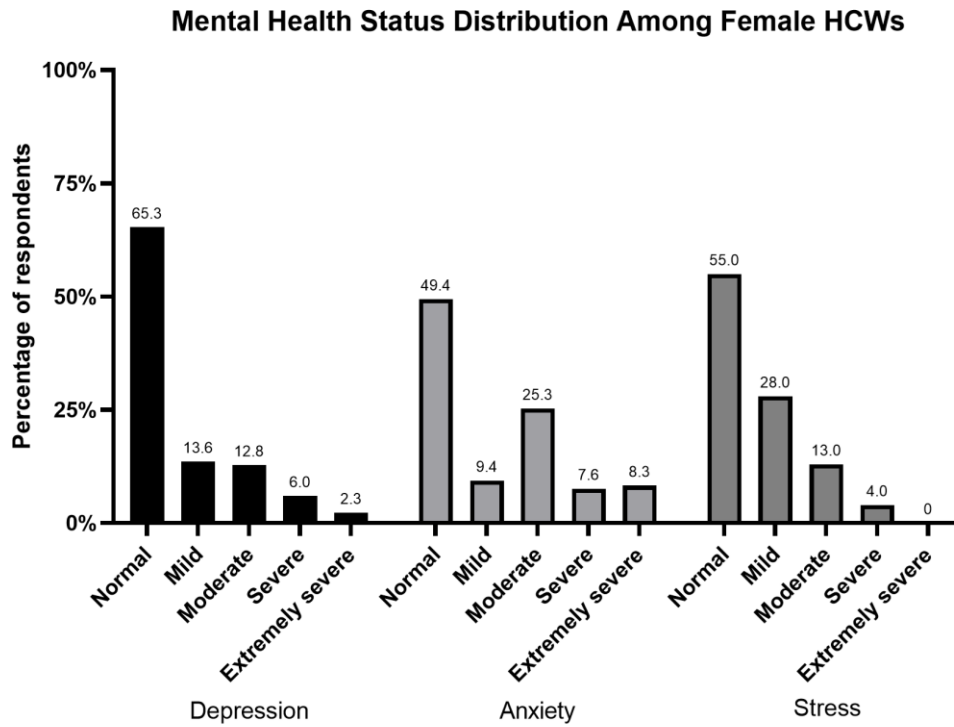

**Supplementary figure 2.** Prevalence of depression, anxiety, and stress among female healthcare workers in each severity level according to DASS-21 scores.



**Supplementary Table 1.** Univariate analysis of determinants for depression among HCWs

| <b>Variables</b>                                                                                | <b>p value</b>   | <b>COR</b> | <b>95%CI</b>  |
|-------------------------------------------------------------------------------------------------|------------------|------------|---------------|
| <b>Age</b>                                                                                      | <b>.018</b>      | 0.941      | 0.913 – 0.969 |
| <b>Sex</b>                                                                                      |                  |            |               |
| Male (ref)                                                                                      | -                | -          | -             |
| Female                                                                                          | <b>.007</b>      | 1.970      | 1.201 – 3.230 |
| <b>Marital status</b>                                                                           |                  |            |               |
| Single (ref)                                                                                    | -                | -          | -             |
| Married                                                                                         | <b>.013</b>      | 0.524      | 0.315 – 0.873 |
| Married with children                                                                           | <b>&lt; .001</b> | 0.337      | 0.192 – 0.592 |
| <b>Job</b>                                                                                      |                  |            |               |
| Doctor (ref)                                                                                    | -                | -          | -             |
| Nurse                                                                                           | .262             | 0.676      | 0.340 – 1.341 |
| Midwife                                                                                         | .133             | 0.380      | 0.107 – 1.345 |
| Dentist                                                                                         | .872             | 1.073      | 0.457 – 2.520 |
| Pharmacist                                                                                      | .464             | 0.676      | 0.237 – 1.929 |
| Others (nutritionist, physiotherapist, laboratory analyst, acupuncturist, and health educators) | .603             | 0.835      | 0.422 – 1.649 |
| <b>Workplace setting</b>                                                                        |                  |            |               |
| COVID-19 hospital or referral hospital (ref)                                                    | -                | -          | -             |
| Non-COVID-19 hospital                                                                           | .156             | 0.645      | 0.353 – 1.181 |
| Primary care or other healthcare facilities                                                     | .096             | 0.666      | 0.412 – 1.075 |
| <b>Workplace island</b>                                                                         |                  |            |               |
| Java Island (ref)                                                                               | -                | -          | -             |
| Outside Java Island                                                                             | .118             | 0.656      | 0.387 – 1.113 |
| <b>Working period during the COVID-19 pandemic</b>                                              |                  |            |               |
| Since the beginning of pandemic (ref)                                                           | -                | -          | -             |
| In the middle of pandemic                                                                       | .268             | 1.338      | 0.799 – 2.238 |
| <b>Working experience before the COVID-19 pandemic</b>                                          |                  |            |               |
| Not working (ref)                                                                               | -                | -          | -             |
| <1 year                                                                                         | .666             | 0.833      | 0.364 – 1.906 |
| 1–3 years                                                                                       | .604             | 1.229      | 0.564 – 2.677 |
| >3 years                                                                                        | .003             | 0.313      | 0.147 – 0.666 |
| <b>Income during the COVID-19 pandemic</b>                                                      |                  |            |               |
| <3 million rupiah/month (ref)                                                                   | -                | -          | -             |
| 3-5 million rupiah/month                                                                        | .322             | 1.377      | 0.731 – 2.594 |
| 5-10 million rupiah/month                                                                       | .413             | 1.301      | 0.692 – 2.446 |
| 10-20 million rupiah/month                                                                      | .918             | 1.042      | 0.478 – 2.271 |
| >20 million rupiah/month                                                                        | .052             | 0.375      | 0.139 – 1.010 |
| <b>Working hour per week during the COVID-19 pandemic</b>                                       |                  |            |               |

|                                                                                        |                  |       |               |
|----------------------------------------------------------------------------------------|------------------|-------|---------------|
| <40 hours/week (ref)                                                                   | -                | -     | -             |
| 40–60 hours/week                                                                       | .114             | 1.444 | 0.916 – 2.279 |
| >60 hours/week                                                                         | .064             | 2.104 | 0.957 – 4.627 |
| <b>History of COVID-19 infection</b>                                                   |                  |       |               |
| Yes                                                                                    | .925             | 0.971 | 0.526 – 1.793 |
| No (ref)                                                                               | -                | -     | -             |
| <b>History of COVID-19 infection in the family</b>                                     |                  |       |               |
| Yes                                                                                    | .447             | 1.197 | 0.753 – 1.903 |
| No (ref)                                                                               | -                | -     | -             |
| <b>Any family member died because of COVID-19</b>                                      |                  |       |               |
| Yes                                                                                    | .130             | 1.884 | 0.829 – 4.282 |
| No (ref)                                                                               | -                | -     | -             |
| <b>Having one or more comorbidities</b>                                                |                  |       |               |
| Yes                                                                                    | .363             | 1.241 | 0.780 – 1.975 |
| No (ref)                                                                               | -                | -     | -             |
| <b>PPE availability in the workplace</b>                                               |                  |       |               |
| Not available or not according to standard (ref)                                       | -                | -     | -             |
| Available and according to standard                                                    | <b>.032</b>      | 0.613 | 0.393 – 0.958 |
| <b>Verbal intimidation in the workplace</b>                                            |                  |       |               |
| Never (ref)                                                                            | -                | -     | -             |
| At least once                                                                          | <b>.001</b>      | 2.102 | 1.355 – 3.263 |
| <b>Physical intimidation in the workplace</b>                                          |                  |       |               |
| Never (ref)                                                                            | -                | -     | -             |
| At least once                                                                          | .974             | 1.020 | 0.308 – 3.381 |
| <b>Intimidation from the society outside workplace</b>                                 |                  |       |               |
| Never (ref)                                                                            | -                | -     | -             |
| At least once                                                                          | <b>.005</b>      | 1.956 | 1.226 – 3.119 |
| <b>Workplace support from intimidation</b>                                             |                  |       |               |
| Yes (ref)                                                                              | -                | -     | -             |
| No                                                                                     | <b>.013</b>      | 1.963 | 1.153 – 3.345 |
| <b>Willingness to work during the COVID-19 pandemic</b>                                |                  |       |               |
| Yes                                                                                    | -                | -     | -             |
| No (ref)                                                                               | <b>.003</b>      | 2.343 | 1.346 – 4.080 |
| <b>Reason for HCW to work during the COVID-19 pandemic because feeling responsible</b> |                  |       |               |
| Yes                                                                                    | <b>&lt; .001</b> | 0.364 | 0.228 – 0.581 |
| No (ref)                                                                               | -                | -     | -             |
| <b>Reason to work during the COVID-19 pandemic because of financial matters</b>        |                  |       |               |
| Yes                                                                                    | .099             | 1.521 | 0.924 – 2.504 |

|                                                                                              |             |       |               |
|----------------------------------------------------------------------------------------------|-------------|-------|---------------|
| No (ref)                                                                                     | -           | -     | -             |
| <b>Reason to work during the COVID-19 pandemic because already bound to working contract</b> |             |       |               |
| Yes                                                                                          | <b>.001</b> | 3.245 | 1.616 – 6.515 |
| No (ref)                                                                                     | -           | -     | -             |

For peer review only

**Supplementary Table 2.** Univariate analysis of determinants for anxiety among HCWs

| <b>Variables</b>                                                                                | <b>p value</b>   | <b>COR</b> | <b>95%CI</b>  |
|-------------------------------------------------------------------------------------------------|------------------|------------|---------------|
| <b>Age</b>                                                                                      | <b>&lt; .001</b> | 0.942      | 0.919 – 0.966 |
| <b>Sex</b>                                                                                      |                  |            |               |
| Male (ref)                                                                                      | -                | -          | -             |
| Female                                                                                          | <b>.001</b>      | 2.070      | 1.332 – 3.218 |
| <b>Marital status</b>                                                                           |                  |            |               |
| Single (ref)                                                                                    | -                | -          | -             |
| Married                                                                                         | <b>.003</b>      | 0.484      | 0.298 – 0.785 |
| Married with children                                                                           | <b>.004</b>      | 0.481      | 0.293 – 0.789 |
| <b>Job</b>                                                                                      |                  |            |               |
| Doctor (ref)                                                                                    | -                | -          | -             |
| Nurse                                                                                           | .092             | 0.583      | 0.311 – 1.039 |
| Midwife                                                                                         | .186             | 0.509      | 0.187 – 1.385 |
| Dentist                                                                                         | .545             | 1.285      | 0.570 – 2.901 |
| Pharmacist                                                                                      | .516             | 0.735      | 0.289 – 1.865 |
| Others (nutritionist, physiotherapist, laboratory analyst, acupuncturist, and health educators) | .826             | 0.932      | 0.499 – 1.741 |
| <b>Workplace setting</b>                                                                        |                  |            |               |
| COVID-19 hospital or referral hospital (ref)                                                    | -                | -          | -             |
| Non-COVID-19 hospital                                                                           | <b>.024</b>      | 0.524      | 0.299 – 0.920 |
| Primary care or other healthcare facilities                                                     | .140             | 0.716      | 0.460 – 1.116 |
| <b>Workplace island</b>                                                                         |                  |            |               |
| Java Island (ref)                                                                               | -                | -          | -             |
| Outside Java Island                                                                             | .464             | 0.840      | 0.527 – 1.339 |
| <b>Working period during the COVID-19 pandemic</b>                                              |                  |            |               |
| Since the beginning of pandemic (ref)                                                           | -                | -          | -             |
| In the middle of pandemic                                                                       | .197             | 1.379      | 0.847 – 2.246 |
| <b>Working experience before the COVID-19 pandemic</b>                                          |                  |            |               |
| Not working (ref)                                                                               | -                | -          | -             |
| <1 year                                                                                         | .147             | 0.545      | 0.240 – 1.238 |
| 1–3 years                                                                                       | .792             | 1.111      | 0.507 – 2.433 |
| >3 years                                                                                        | <b>.012</b>      | 0.394      | 0.191 – 0.812 |
| <b>Income during the COVID-19 pandemic</b>                                                      |                  |            |               |
| <3 million rupiah/month (ref)                                                                   | -                | -          | -             |
| 3-5 million rupiah/month                                                                        | .674             | 1.135      | 0.631 – 2.041 |
| 5-10 million rupiah/month                                                                       | .851             | 1.058      | 0.590 – 1.895 |
| 10-20 million rupiah/month                                                                      | .633             | 0.840      | 0.411 – 1.718 |
| >20 million rupiah/month                                                                        | .246             | 0.640      | 0.301 – 1.361 |
| <b>Working hour per week during the COVID-19 pandemic</b>                                       |                  |            |               |

|                                                                                        |                  |       |               |
|----------------------------------------------------------------------------------------|------------------|-------|---------------|
| <40 hours/week (ref)                                                                   | -                | -     | -             |
| 40–60 hours/week                                                                       | .263             | 1.268 | 0.836 – 1.923 |
| >60 hours/week                                                                         | .157             | 1.739 | 0.808 – 3.746 |
| <b>History of COVID-19 infection</b>                                                   |                  |       |               |
| Yes                                                                                    | .206             | 1.438 | 0.819 – 2.526 |
| No (ref)                                                                               | -                | -     | -             |
| <b>History of COVID-19 infection in the family</b>                                     |                  |       |               |
| Yes                                                                                    | .996             | 1.001 | 0.649 – 1.545 |
| No (ref)                                                                               | -                | -     | -             |
| <b>Any family member died because of COVID-19</b>                                      |                  |       |               |
| Yes                                                                                    | .462             | 1.356 | 0.602 – 3.051 |
| No (ref)                                                                               | -                | -     | -             |
| <b>Having one or more comorbidities</b>                                                |                  |       |               |
| Yes                                                                                    | .670             | 1.099 | 0.711 – 1.699 |
| No (ref)                                                                               | -                | -     | -             |
| <b>PPE availability in the workplace</b>                                               |                  |       |               |
| Not available or not according to standard (ref)                                       | -                | -     | -             |
| Available and according to standard                                                    | <b>.036</b>      | 0.638 | 0.419 – 0.970 |
| <b>Verbal intimidation in the workplace</b>                                            |                  |       |               |
| Never (ref)                                                                            | -                | -     | -             |
| At least once                                                                          | <b>.002</b>      | 1.940 | 1.283 – 2.933 |
| <b>Physical intimidation in the workplace</b>                                          |                  |       |               |
| Never (ref)                                                                            | -                | -     | -             |
| At least once                                                                          | .926             | 1.054 | 0.348 – 3.195 |
| <b>Intimidation from the society outside workplace</b>                                 |                  |       |               |
| Never (ref)                                                                            | -                | -     | -             |
| At least once                                                                          | <b>.024</b>      | 1.675 | 1.071 – 2.620 |
| <b>Workplace support from intimidation</b>                                             |                  |       |               |
| Yes (ref)                                                                              | -                | -     | -             |
| No                                                                                     | <b>.003</b>      | 2.263 | 1.332 – 3.845 |
| <b>Willingness to work during the COVID-19 pandemic</b>                                |                  |       |               |
| Yes                                                                                    | -                | -     | -             |
| No (ref)                                                                               | <b>&lt; .001</b> | 2.820 | 1.55 – 4.986  |
| <b>Reason for HCW to work during the COVID-19 pandemic because feeling responsible</b> |                  |       |               |
| Yes                                                                                    | <b>.001</b>      | 0.459 | 0.292 – 0.721 |
| No (ref)                                                                               | -                | -     | -             |
| <b>Reason to work during the COVID-19 pandemic because of financial matters</b>        |                  |       |               |
| Yes                                                                                    | <b>.040</b>      | 1.650 | 1.024 – 2.660 |

1  
2  
3  
4  
5  
6  
7  
8  
9  
10  
11  
12  
13  
14  
15  
16  
17  
18  
19  
20  
21  
22  
23  
24  
25  
26  
27  
28  
29  
30  
31  
32  
33  
34  
35  
36  
37  
38  
39  
40  
41  
42  
43  
44  
45  
46  
47  
48  
49  
50  
51  
52  
53  
54  
55  
56  
57  
58  
59  
60

|                                                                                              |      |       |               |
|----------------------------------------------------------------------------------------------|------|-------|---------------|
| No (ref)                                                                                     | -    | -     | -             |
| <b>Reason to work during the COVID-19 pandemic because already bound to working contract</b> |      |       |               |
| Yes                                                                                          | .093 | 1.815 | 1.906 – 3.637 |
| No (ref)                                                                                     | -    | -     | -             |

For peer review only

**Supplementary Table 3.** Univariate analysis of determinants for stress among HCWs

| <b>Variables</b>                                                                                | <b>p value</b>   | <b>COR</b> | <b>95%CI</b>  |
|-------------------------------------------------------------------------------------------------|------------------|------------|---------------|
| <b>Age</b>                                                                                      | <b>&lt; .001</b> | 0.955      | 0.932 – 0.978 |
| <b>Sex</b>                                                                                      |                  |            |               |
| Male (ref)                                                                                      | -                | -          | -             |
| Female                                                                                          | .076             | 1.485      | 0.960 – 2.299 |
| <b>Marital status</b>                                                                           |                  |            |               |
| Single (ref)                                                                                    | -                | -          | -             |
| Married                                                                                         | <b>.020</b>      | 0.561      | 0.345 – 0.911 |
| Married with children                                                                           | .055             | 0.616      | 0.376 – 1.009 |
| <b>Job</b>                                                                                      |                  |            |               |
| Doctor (ref)                                                                                    | -                | -          | -             |
| Nurse                                                                                           | .311             | 0.722      | 0.385 – 1.355 |
| Midwife                                                                                         | .644             | 0.796      | 0.302 – 2.097 |
| Dentist                                                                                         | .706             | 1.170      | 0.518 – 2.642 |
| Pharmacist                                                                                      | .506             | 1.365      | 0.546 – 3.408 |
| Others (nutritionist, physiotherapist, laboratory analyst, acupuncturist, and health educators) | .853             | 1.061      | 0.566 – 1.989 |
| <b>Workplace setting</b>                                                                        |                  |            |               |
| COVID-19 hospital or referral hospital (ref)                                                    | -                | -          | -             |
| Non-COVID-19 hospital                                                                           | .321             | 0.754      | 0.432 – 1.317 |
| Primary care or other healthcare facilities                                                     | .407             | 0.828      | 0.530 – 1.294 |
| <b>Workplace island</b>                                                                         |                  |            |               |
| Java Island (ref)                                                                               | -                | -          | -             |
| Outside Java Island                                                                             | .607             | 0.884      | 0.553 – 1.414 |
| <b>Working period during the COVID-19 pandemic</b>                                              |                  |            |               |
| Since the beginning of pandemic (ref)                                                           | -                | -          | -             |
| In the middle of pandemic                                                                       | .742             | 0.920      | 0.561 – 1.511 |
| <b>Working experience before the COVID-19 pandemic</b>                                          |                  |            |               |
| Not working (ref)                                                                               | -                | -          | -             |
| <1 year                                                                                         | .261             | 0.624      | 0.274 – 1.421 |
| 1–3 years                                                                                       | .403             | 1.390      | 0.642 – 3.011 |
| >3 years                                                                                        | .228             | 0.644      | 0.315 – 1.317 |
| <b>Income during the COVID-19 pandemic</b>                                                      |                  |            |               |
| <3 million rupiah/month (ref)                                                                   | -                | -          | -             |
| 3-5 million rupiah/month                                                                        | .100             | 1.655      | 0.909 – 3.013 |
| 5-10 million rupiah/month                                                                       | .236             | 1.434      | 0.790 – 2.604 |
| 10-20 million rupiah/month                                                                      | .584             | 1.225      | 0.593 – 2.531 |
| >20 million rupiah/month                                                                        | .357             | 0.89       | 0.312 – 1.522 |
| <b>Working hour per week during the COVID-19 pandemic</b>                                       |                  |            |               |

|                                                                                        |                  |       |               |
|----------------------------------------------------------------------------------------|------------------|-------|---------------|
| <40 hours/week (ref)                                                                   | -                | -     | -             |
| 40–60 hours/week                                                                       | .359             | 1.217 | 0.800 – 1.852 |
| >60 hours/week                                                                         | .321             | 1.473 | 0.685 – 3.168 |
| <b>History of COVID-19 infection</b>                                                   |                  |       |               |
| Yes                                                                                    | .532             | 1.197 | 0.681 – 2.106 |
| No (ref)                                                                               | -                | -     | -             |
| <b>History of COVID-19 infection in the family</b>                                     |                  |       |               |
| Yes                                                                                    | .935             | 0.982 | 0.634 – 1.521 |
| No (ref)                                                                               | -                | -     | -             |
| <b>Any family member died because of COVID-19</b>                                      |                  |       |               |
| Yes                                                                                    | .143             | 1.841 | 0.814 – 4.167 |
| No (ref)                                                                               | -                | -     | -             |
| <b>Having one or more comorbidities</b>                                                |                  |       |               |
| Yes                                                                                    | .437             | 1.190 | 0.768 – 1.843 |
| No (ref)                                                                               | -                | -     | -             |
| <b>PPE availability in the workplace</b>                                               |                  |       |               |
| Not available or not according to standard (ref)                                       | -                | -     | -             |
| Available and according to standard                                                    | <b>.019</b>      | 0.602 | 0.395 – 0.919 |
| <b>Verbal intimidation in the workplace</b>                                            |                  |       |               |
| Never (ref)                                                                            | -                | -     | -             |
| At least once                                                                          | <b>.025</b>      | 1.604 | 1.061 – 2.425 |
| <b>Physical intimidation in the workplace</b>                                          |                  |       |               |
| Never (ref)                                                                            | -                | -     | -             |
| At least once                                                                          | .377             | 1.650 | 0.544 – 5.003 |
| <b>Intimidation from the society outside workplace</b>                                 |                  |       |               |
| Never (ref)                                                                            | -                | -     | -             |
| At least once                                                                          | <b>.019</b>      | 1.708 | 1.091 – 2.673 |
| <b>Workplace support from intimidation</b>                                             |                  |       |               |
| Yes (ref)                                                                              | -                | -     | -             |
| No                                                                                     | <b>.005</b>      | 2.129 | 1.261 – 3.595 |
| <b>Willingness to work during the COVID-19 pandemic</b>                                |                  |       |               |
| Yes                                                                                    | -                | -     | -             |
| No (ref)                                                                               | <b>&lt; .001</b> | 2.781 | 1.586 – 4.874 |
| <b>Reason for HCW to work during the COVID-19 pandemic because feeling responsible</b> |                  |       |               |
| Yes                                                                                    | <b>&lt; .001</b> | 0.427 | 0.271 – 0.671 |
| No (ref)                                                                               | -                | -     | -             |
| <b>Reason to work during the COVID-19 pandemic because of financial matters</b>        |                  |       |               |
| Yes                                                                                    | <b>.001</b>      | 2.193 | 1.355 – 3.549 |



|                                                                                              |             |       |               |
|----------------------------------------------------------------------------------------------|-------------|-------|---------------|
| No (ref)                                                                                     | -           | -     | -             |
| <b>Reason to work during the COVID-19 pandemic because already bound to working contract</b> |             |       |               |
| Yes                                                                                          | <b>.006</b> | 2.698 | 1.323 – 5.501 |
| No (ref)                                                                                     | -           | -     | -             |

For peer review only

**Supplementary Table 4.** Univariate analysis of determinants for impaired physical health component among HCWs

| <b>Variables</b>                                                                                | <b>p value</b> | <b>COR</b> | <b>95%CI</b>   |
|-------------------------------------------------------------------------------------------------|----------------|------------|----------------|
| <b>Age</b>                                                                                      | .134           | 1.033      | 0.990 – 1.079  |
| <b>Sex</b>                                                                                      |                |            |                |
| Male (ref)                                                                                      | -              | -          | -              |
| Female                                                                                          | .633           | 0.836      | 0.401 – 1.744  |
| <b>Marital status</b>                                                                           |                |            |                |
| Single (ref)                                                                                    | -              | -          | -              |
| Married                                                                                         | .318           | 1.496      | 0.878 – 3.299  |
| Married with children                                                                           | .214           | 1.703      | 0.735 – 3.945  |
| <b>Job</b>                                                                                      |                |            |                |
| Doctor (ref)                                                                                    | -              | -          | -              |
| Nurse                                                                                           | .310           | 0.621      | 0.248 – 1.557  |
| Midwife                                                                                         | .802           | 0.821      | 0.177 – 3.813  |
| Dentist                                                                                         | .285           | 0.531      | 0.167 – 1.695  |
| Pharmacist                                                                                      | .564           | 1.836      | 0.233 – 14.441 |
| Others (nutritionist, physiotherapist, laboratory analyst, acupuncturist, and health educators) | .915           | 1.063      | 0.346 – 3.263  |
| <b>Workplace setting</b>                                                                        |                |            |                |
| COVID-19 hospital or referral hospital (ref)                                                    | -              | -          | -              |
| Non-COVID-19 hospital                                                                           | .298           | 0.633      | 0.267 – 1.499  |
| Primary care or other healthcare facilities                                                     | .944           | 0.973      | 0.448 – 2.113  |
| <b>Workplace island</b>                                                                         |                |            |                |
| Java Island (ref)                                                                               | -              | -          | -              |
| Outside Java Island                                                                             | .095           | 2.284      | 0.865 – 6.026  |
| <b>Working period during the COVID-19 pandemic</b>                                              |                |            |                |
| Since the beginning of pandemic (ref)                                                           | -              | -          | -              |
| In the middle of pandemic                                                                       | .659           | 0.837      | 0.380 – 1.846  |
| <b>Working experience before the COVID-19 pandemic</b>                                          |                |            |                |
| Not working (ref)                                                                               | -              | -          | -              |
| <1 year                                                                                         | .090           | 0.163      | 0.020 – 1.328  |
| 1–3 years                                                                                       | .143           | 0.210      | 0.026 – 1.693  |
| >3 years                                                                                        | .281           | 0.323      | 0.042 – 2.517  |
| <b>Income during the COVID-19 pandemic</b>                                                      |                |            |                |
| <3 million rupiah/month (ref)                                                                   | -              | -          | -              |
| 3-5 million rupiah/month                                                                        | .555           | 1.423      | 0.441 – 4.591  |
| 5-10 million rupiah/month                                                                       | .052           | 0.385      | 0.147 – 1.008  |
| 10-20 million rupiah/month                                                                      | .680           | 1.352      | 0.322 – 5.670  |
| >20 million rupiah/month                                                                        | .794           | 1.211      | 0.288 – 5.096  |
| <b>Working hour per week during the</b>                                                         |                |            |                |

|                                                                                        |      |       |                |
|----------------------------------------------------------------------------------------|------|-------|----------------|
| <b>COVID-19 pandemic</b>                                                               |      |       |                |
| <40 hours/week (ref)                                                                   | -    | -     | -              |
| 40–60 hours/week                                                                       | .706 | 1.146 | 0.565 – 2.325  |
| >60 hours/week                                                                         | .626 | 0.750 | 0.236 – 2.386  |
| <b>History of COVID-19 infection</b>                                                   |      |       |                |
| Yes                                                                                    | .818 | 0.898 | 0.357 – 2.255  |
| No (ref)                                                                               | -    | -     | -              |
| <b>History of COVID-19 infection in the family</b>                                     |      |       |                |
| Yes                                                                                    | .342 | 0.713 | 0.35 – 1.433   |
| No (ref)                                                                               | -    | -     | -              |
| <b>Any family member died because of COVID-19</b>                                      |      |       |                |
| Yes                                                                                    | .278 | 0.536 | 0.174 – 1.653  |
| No (ref)                                                                               | -    | -     | -              |
| <b>Having one or more comorbidities</b>                                                |      |       |                |
| Yes                                                                                    | .778 | 0.901 | 0.438 – 1.854  |
| No (ref)                                                                               | -    | -     | -              |
| <b>PPE availability in the workplace</b>                                               |      |       |                |
| Not available or not according to standard (ref)                                       | -    | -     | -              |
| Available and according to standard                                                    | .285 | 0.662 | 0.312 – 1.408  |
| <b>Verbal intimidation in the workplace</b>                                            |      |       |                |
| Never (ref)                                                                            | -    | -     | -              |
| At least once                                                                          | .876 | 1.057 | 0.528 – 2.113  |
| <b>Physical intimidation in the workplace</b>                                          |      |       |                |
| Never (ref)                                                                            | -    | -     | -              |
| At least once                                                                          | .805 | 1.298 | 0.164 – 10.268 |
| <b>Intimidation from the society outside workplace</b>                                 |      |       |                |
| Never (ref)                                                                            | -    | -     | -              |
| At least once                                                                          | .366 | 1.456 | 0.645 – 3.285  |
| <b>Workplace support from intimidation</b>                                             |      |       |                |
| Yes (ref)                                                                              | -    | -     | -              |
| No                                                                                     | .589 | 0.796 | 0.348 – 1.820  |
| <b>Willingness to work during the COVID-19 pandemic</b>                                |      |       |                |
| Yes                                                                                    | -    | -     | -              |
| No (ref)                                                                               | .996 | 1.002 | 0.400 – 2.509  |
| <b>Reason for HCW to work during the COVID-19 pandemic because feeling responsible</b> |      |       |                |
| Yes                                                                                    | .080 | 1.857 | 0.929 – 3.712  |
| No (ref)                                                                               | -    | -     | -              |
| <b>Reason to work during the COVID-19 pandemic because of financial matters</b>        |      |       |                |

|                                                                                              |      |       |               |
|----------------------------------------------------------------------------------------------|------|-------|---------------|
| Yes                                                                                          | .071 | 0.517 | 0.252 – 1.059 |
| No (ref)                                                                                     | -    | -     | -             |
| <b>Reason to work during the COVID-19 pandemic because already bound to working contract</b> |      |       |               |
| Yes                                                                                          | .722 | 1.199 | 0.350 – 4.113 |
| No (ref)                                                                                     | -    | -     | -             |

For peer review only

**Supplementary Table 5.** Univariate analysis of determinants for impaired mental health component among HCWs

| <b>Variables</b>                                                                                | <b>p value</b> | <b>COR</b> | <b>95%CI</b>  |
|-------------------------------------------------------------------------------------------------|----------------|------------|---------------|
| <b>Age</b>                                                                                      | .973           | 1.000      | 0.978 – 1.021 |
| <b>Sex</b>                                                                                      |                |            |               |
| Male (ref)                                                                                      | -              | -          | -             |
| Female                                                                                          | .748           | 0.932      | 0.605 – 1.434 |
| <b>Marital status</b>                                                                           |                |            |               |
| Single (ref)                                                                                    | -              | -          | -             |
| Married                                                                                         | .266           | 1.319      | 0.810 – 2.148 |
| Married with children                                                                           | .263           | 1.329      | 0.808 – 2.187 |
| <b>Job</b>                                                                                      |                |            |               |
| Doctor (ref)                                                                                    | -              | -          | -             |
| Nurse                                                                                           | .057           | 1.804      | 0.983 – 3.310 |
| Midwife                                                                                         | .958           | 0.975      | 0.369 – 2.571 |
| Dentist                                                                                         | .777           | 0.884      | 0.377 – 2.072 |
| Pharmacist                                                                                      | .273           | 1.671      | 0.668 – 4.179 |
| Others (nutritionist, physiotherapist, laboratory analyst, acupuncturist, and health educators) | .994           | 1.002      | 0.527 – 1.907 |
| <b>Workplace setting</b>                                                                        |                |            |               |
| COVID-19 hospital or referral hospital (ref)                                                    | -              | -          | -             |
| Non-COVID-19 hospital                                                                           | .752           | 1.093      | 0.629 – 1.898 |
| Primary care or other healthcare facilities                                                     | .391           | 0.820      | 0.521 – 1.290 |
| <b>Workplace island</b>                                                                         |                |            |               |
| Java Island (ref)                                                                               | -              | -          | -             |
| Outside Java Island                                                                             | .961           | 0.988      | 0.617 – 1.582 |
| <b>Working period during the COVID-19 pandemic</b>                                              |                |            |               |
| Since the beginning of pandemic (ref)                                                           | -              | -          | -             |
| In the middle of pandemic                                                                       | .729           | 1.092      | 0.665 – 1.790 |
| <b>Working experience before the COVID-19 pandemic</b>                                          |                |            |               |
| Not working (ref)                                                                               | -              | -          | -             |
| <1 year                                                                                         | .252           | 1.619      | 0.710 – 3.689 |
| 1–3 years                                                                                       | .502           | 0.760      | 0.342 – 1.691 |
| >3 years                                                                                        | .937           | 1.030      | 0.497 – 2.134 |
| <b>Income during the COVID-19 pandemic</b>                                                      |                |            |               |
| <3 million rupiah/month (ref)                                                                   | -              | -          | -             |
| 3-5 million rupiah/month                                                                        | .187           | 1.510      | 0.818 – 2.785 |
| 5-10 million rupiah/month                                                                       | .050           | 1.833      | 1.001 – 3.358 |
| 10-20 million rupiah/month                                                                      | .919           | 1.040      | 0.490 – 2.208 |
| >20 million rupiah/month                                                                        | .612           | 1.219      | 0.567 – 2.622 |
| <b>Working hour per week during the</b>                                                         |                |            |               |

|                                                                                        |      |       |               |
|----------------------------------------------------------------------------------------|------|-------|---------------|
| <b>COVID-19 pandemic</b>                                                               |      |       |               |
| <40 hours/week (ref)                                                                   | -    | -     | -             |
| 40–60 hours/week                                                                       | .177 | 1.338 | 0.877 – 2.040 |
| >60 hours/week                                                                         | .899 | 0.950 | 0.429 – 2.105 |
| <b>History of COVID-19 infection</b>                                                   |      |       |               |
| Yes                                                                                    | .841 | 0.943 | 0.430 – 1.678 |
| No (ref)                                                                               | -    | -     | -             |
| <b>History of COVID-19 infection in the family</b>                                     |      |       |               |
| Yes                                                                                    | .829 | 0.953 | 0.612 – 1.482 |
| No (ref)                                                                               | -    | -     | -             |
| <b>Any family member died because of COVID-19</b>                                      |      |       |               |
| Yes                                                                                    | .388 | 1.429 | 0.635 – 3.220 |
| No (ref)                                                                               | -    | -     | -             |
| <b>Having one or more comorbidities</b>                                                |      |       |               |
| Yes                                                                                    | .475 | 0.850 | 0.544 – 1.328 |
| No (ref)                                                                               | -    | -     | -             |
| <b>PPE availability in the workplace</b>                                               |      |       |               |
| Not available or not according to standard (ref)                                       | -    | -     | -             |
| Available and according to standard                                                    | .424 | 0.841 | 0.550 – 1.286 |
| <b>Verbal intimidation in the workplace</b>                                            |      |       |               |
| Never (ref)                                                                            | -    | -     | -             |
| At least once                                                                          | .626 | 0.901 | 0.593 – 1.369 |
| <b>Physical intimidation in the workplace</b>                                          |      |       |               |
| Never (ref)                                                                            | -    | -     | -             |
| At least once                                                                          | .920 | 0.944 | 0.303 – 2.939 |
| <b>Intimidation from the society outside workplace</b>                                 |      |       |               |
| Never (ref)                                                                            | -    | -     | -             |
| At least once                                                                          | .893 | 0.969 | 0.615 – 1.527 |
| <b>Workplace support from intimidation</b>                                             |      |       |               |
| Yes (ref)                                                                              | -    | -     | -             |
| No                                                                                     | .099 | 1.548 | 0.920 – 2.604 |
| <b>Willingness to work during the COVID-19 pandemic</b>                                |      |       |               |
| Yes                                                                                    | -    | -     | -             |
| No (ref)                                                                               | .300 | 0.740 | 0.418 – 1.308 |
| <b>Reason for HCW to work during the COVID-19 pandemic because feeling responsible</b> |      |       |               |
| Yes                                                                                    | .307 | 0.791 | 0.504 – 1.240 |
| No (ref)                                                                               | -    | -     | -             |
| <b>Reason to work during the COVID-19 pandemic because of financial matters</b>        |      |       |               |

|                                                                                              |      |       |               |
|----------------------------------------------------------------------------------------------|------|-------|---------------|
| Yes                                                                                          | .140 | 1.434 | 0.888 – 2.314 |
| No (ref)                                                                                     | -    | -     | -             |
| <b>Reason to work during the COVID-19 pandemic because already bound to working contract</b> |      |       |               |
| Yes                                                                                          | .238 | 0.640 | 0.305 – 1.342 |
| No (ref)                                                                                     | -    | -     | -             |

For peer review only

## STROBE Statement—checklist of items that should be included in reports of observational studies

|                           | Item No | Recommendation                                                                                                                                                                                                                                                                                                                                                                                                                                                         | Page No             |
|---------------------------|---------|------------------------------------------------------------------------------------------------------------------------------------------------------------------------------------------------------------------------------------------------------------------------------------------------------------------------------------------------------------------------------------------------------------------------------------------------------------------------|---------------------|
| <b>Title and abstract</b> | 1       | (a) Indicate the study's design with a commonly used term in the title or the abstract                                                                                                                                                                                                                                                                                                                                                                                 | 3 (line 58)         |
|                           |         | (b) Provide in the abstract an informative and balanced summary of what was done and what was found                                                                                                                                                                                                                                                                                                                                                                    | 3 (line 71-74)      |
| <b>Introduction</b>       |         |                                                                                                                                                                                                                                                                                                                                                                                                                                                                        |                     |
| Background/rationale      | 2       | Explain the scientific background and rationale for the investigation being reported                                                                                                                                                                                                                                                                                                                                                                                   | 5-6 (line 90-125)   |
| Objectives                | 3       | State specific objectives, including any prespecified hypotheses                                                                                                                                                                                                                                                                                                                                                                                                       | 6 (line 125-127)    |
| <b>Methods</b>            |         |                                                                                                                                                                                                                                                                                                                                                                                                                                                                        |                     |
| Study design              | 4       | Present key elements of study design early in the paper                                                                                                                                                                                                                                                                                                                                                                                                                | 7 (line 130)        |
| Setting                   | 5       | Describe the setting, locations, and relevant dates, including periods of recruitment, exposure, follow-up, and data collection                                                                                                                                                                                                                                                                                                                                        | 7 (130-144)         |
| Participants              | 6       | (a) <i>Cohort study</i> —Give the eligibility criteria, and the sources and methods of selection of participants. Describe methods of follow-up<br><i>Case-control study</i> —Give the eligibility criteria, and the sources and methods of case ascertainment and control selection. Give the rationale for the choice of cases and controls<br><i>Cross-sectional study</i> —Give the eligibility criteria, and the sources and methods of selection of participants | 7 (140-143)         |
|                           |         | (b) <i>Cohort study</i> —For matched studies, give matching criteria and number of exposed and unexposed<br><i>Case-control study</i> —For matched studies, give matching criteria and the number of controls per case                                                                                                                                                                                                                                                 |                     |
| Variables                 | 7       | Clearly define all outcomes, exposures, predictors, potential confounders, and effect modifiers. Give diagnostic criteria, if applicable                                                                                                                                                                                                                                                                                                                               | 8-9 (line 161-198)  |
| Data sources/measurement  | 8*      | For each variable of interest, give sources of data and details of methods of assessment (measurement). Describe comparability of assessment methods if there is more than one group                                                                                                                                                                                                                                                                                   | 8-9 (line 161-198)  |
| Bias                      | 9       | Describe any efforts to address potential sources of bias                                                                                                                                                                                                                                                                                                                                                                                                              | 7 (line 131-134)    |
| Study size                | 10      | Explain how the study size was arrived at                                                                                                                                                                                                                                                                                                                                                                                                                              | 7 (line 145-147)    |
| Quantitative variables    | 11      | Explain how quantitative variables were handled in the analyses. If applicable, describe which groupings were chosen and why                                                                                                                                                                                                                                                                                                                                           | 10 (line 204-206)   |
| Statistical methods       | 12      | (a) Describe all statistical methods, including those used to control for confounding                                                                                                                                                                                                                                                                                                                                                                                  | 9-10 (line 201-216) |
|                           |         | (b) Describe any methods used to examine subgroups and interactions                                                                                                                                                                                                                                                                                                                                                                                                    | 10 (line 206-216)   |
|                           |         | (c) Explain how missing data were addressed                                                                                                                                                                                                                                                                                                                                                                                                                            | 9 (line 201)        |



1  
2  
3  
4  
5  
6  
7  
8  
9  
10  
11  
12  
13  
14  
15  
16  
17  
18  
19  
20  
21  
22  
23  
24  
25  
26  
27  
28  
29  
30  
31  
32  
33  
34  
35  
36  
37  
38  
39  
40  
41  
42  
43  
44  
45  
46  
47  
48  
49  
50  
51  
52  
53  
54  
55  
56  
57  
58  
59  
60

(d) *Cohort study*—If applicable, explain how loss to follow-up was addressed

N/A

*Case-control study*—If applicable, explain how matching of cases and controls was addressed

*Cross-sectional study*—If applicable, describe analytical methods taking account of sampling strategy

(e) Describe any sensitivity analyses

N/A

Continued on next page

For peer review only

1  
2  
3  
4  
5  
6  
7  
8  
9  
10  
11  
12  
13  
14  
15  
16  
17  
18  
19  
20  
21  
22  
23  
24  
25  
26  
27  
28  
29  
30  
31  
32  
33  
34  
35  
36  
37  
38  
39  
40  
41  
42  
43  
44  
45  
46  
47  
48  
49  
50  
51  
52  
53  
54  
55  
56  
57  
58  
59  
60

| <b>Results</b>           |     |                                                                                                                                                                                                              |                                                  |
|--------------------------|-----|--------------------------------------------------------------------------------------------------------------------------------------------------------------------------------------------------------------|--------------------------------------------------|
| Participants             | 13* | (a) Report numbers of individuals at each stage of study—eg numbers potentially eligible, examined for eligibility, confirmed eligible, included in the study, completing follow-up, and analysed            | 11 (line 221-222)                                |
|                          |     | (b) Give reasons for non-participation at each stage                                                                                                                                                         | Figure 1                                         |
|                          |     | (c) Consider use of a flow diagram                                                                                                                                                                           | Figure 1                                         |
| Descriptive data         | 14* | (a) Give characteristics of study participants (eg demographic, clinical, social) and information on exposures and potential confounders                                                                     | Table 2                                          |
|                          |     | (b) Indicate number of participants with missing data for each variable of interest                                                                                                                          | Table 2                                          |
|                          |     | (c) <i>Cohort study</i> —Summarise follow-up time (eg, average and total amount)                                                                                                                             | N/A                                              |
| Outcome data             | 15* | <i>Cohort study</i> —Report numbers of outcome events or summary measures over time                                                                                                                          | N/A                                              |
|                          |     | <i>Case-control study</i> —Report numbers in each exposure category, or summary measures of exposure                                                                                                         | N/A                                              |
|                          |     | <i>Cross-sectional study</i> —Report numbers of outcome events or summary measures                                                                                                                           | 11 (line 227-228); 12 (line 266-267)             |
| Main results             | 16  | (a) Give unadjusted estimates and, if applicable, confounder-adjusted estimates and their precision (eg, 95% confidence interval). Make clear which confounders were adjusted for and why they were included | Tables 3, 4, and 5; supplementary tables 1, 2, 3 |
|                          |     | (b) Report category boundaries when continuous variables were categorized                                                                                                                                    | Table 1; 9 (line 197-198); 10 (line 215-216)     |
|                          |     | (c) If relevant, consider translating estimates of relative risk into absolute risk for a meaningful time period                                                                                             | N/A                                              |
| Other analyses           | 17  | Report other analyses done—eg analyses of subgroups and interactions, and sensitivity analyses                                                                                                               | 11 (line 229-233)                                |
| <b>Discussion</b>        |     |                                                                                                                                                                                                              |                                                  |
| Key results              | 18  | Summarise key results with reference to study objectives                                                                                                                                                     | 14 (line 275-279)                                |
| Limitations              | 19  | Discuss limitations of the study, taking into account sources of potential bias or imprecision. Discuss both direction and magnitude of any potential bias                                                   | 18 (line 378-395)                                |
| Interpretation           | 20  | Give a cautious overall interpretation of results considering objectives, limitations, multiplicity of analyses, results from similar studies, and other relevant evidence                                   | 14-18 (line 282-395)                             |
| Generalisability         | 21  | Discuss the generalisability (external validity) of the study results                                                                                                                                        | 18 (line 380-387)                                |
| <b>Other information</b> |     |                                                                                                                                                                                                              |                                                  |
| Funding                  | 22  | Give the source of funding and the role of the funders for the present study and, if applicable, for the original study on which the present article is based                                                | 20 (line 420-421)                                |

1  
2 \*Give information separately for cases and controls in case-control studies and, if applicable, for exposed and  
3 unexposed groups in cohort and cross-sectional studies.  
4

5  
6 **Note:** An Explanation and Elaboration article discusses each checklist item and gives methodological background and  
7 published examples of transparent reporting. The STROBE checklist is best used in conjunction with this article (freely  
8 available on the Web sites of PLoS Medicine at <http://www.plosmedicine.org/>, Annals of Internal Medicine at  
9 <http://www.annals.org/>, and Epidemiology at <http://www.epidem.com/>). Information on the STROBE Initiative is  
10 available at [www.strobe-statement.org](http://www.strobe-statement.org).  
11  
12  
13  
14  
15  
16  
17  
18  
19  
20  
21  
22  
23  
24  
25  
26  
27  
28  
29  
30  
31  
32  
33  
34  
35  
36  
37  
38  
39  
40  
41  
42  
43  
44  
45  
46  
47  
48  
49  
50  
51  
52  
53  
54  
55  
56  
57  
58  
59  
60

# BMJ Open

## Mental Health and Health-Related Quality of Life among Healthcare Workers in Indonesia during the Coronavirus Disease 2019 Pandemic: A Cross-Sectional Study

|                                 |                                                                                                                                                                                                                                                                                                                                                                                                                                                                                                                                                                                                                                                                                                                                                                                                                                                                                                                                                                                                                                                                                                                                                                                                                                                                                                                    |
|---------------------------------|--------------------------------------------------------------------------------------------------------------------------------------------------------------------------------------------------------------------------------------------------------------------------------------------------------------------------------------------------------------------------------------------------------------------------------------------------------------------------------------------------------------------------------------------------------------------------------------------------------------------------------------------------------------------------------------------------------------------------------------------------------------------------------------------------------------------------------------------------------------------------------------------------------------------------------------------------------------------------------------------------------------------------------------------------------------------------------------------------------------------------------------------------------------------------------------------------------------------------------------------------------------------------------------------------------------------|
| Journal:                        | <i>BMJ Open</i>                                                                                                                                                                                                                                                                                                                                                                                                                                                                                                                                                                                                                                                                                                                                                                                                                                                                                                                                                                                                                                                                                                                                                                                                                                                                                                    |
| Manuscript ID                   | bmjopen-2021-057963.R2                                                                                                                                                                                                                                                                                                                                                                                                                                                                                                                                                                                                                                                                                                                                                                                                                                                                                                                                                                                                                                                                                                                                                                                                                                                                                             |
| Article Type:                   | Original research                                                                                                                                                                                                                                                                                                                                                                                                                                                                                                                                                                                                                                                                                                                                                                                                                                                                                                                                                                                                                                                                                                                                                                                                                                                                                                  |
| Date Submitted by the Author:   | 21-Mar-2022                                                                                                                                                                                                                                                                                                                                                                                                                                                                                                                                                                                                                                                                                                                                                                                                                                                                                                                                                                                                                                                                                                                                                                                                                                                                                                        |
| Complete List of Authors:       | Syamlan, Adila T.; Faculty of Medicine Universitas Airlangga - Dr. Soetomo General Academic Hospital, Department of Psychiatry Salamah, Sovia; Faculty of Medicine Universitas Airlangga, Department of Public Health and Preventive Medicine; University Medical Centre Groningen, Division of Nephrology, Department of Internal Medicine, University Medical Center Groningen, Groningen, The Netherland. Alkaff, Firas; Faculty of Medicine Universitas Airlangga, Department of Anatomy, Histology, and Pharmacology; University Medical Centre Groningen, Division of Nephrology, Department of Internal Medicine, University Medical Center Groningen, Groningen, The Netherland. Prayudi, Yogi E.; Faculty of Medicine Universitas Airlangga Kamil, Muhammad; Faculty of Medicine Universitas Airlangga - Dr. Soetomo General Academic Hospital, Department of Neurosurgery Irzaldy, Abyan; Karolinska Institute Karimah, Azimatul; Faculty of Medicine Universitas Airlangga - Dr. Soetomo General Academic Hospital, Department of Psychiatry Postma, Maarten; University of Groningen, Pharmacoepidemiology and Pharmacoeconomics Purba, Fredrick; Padjadjaran University, Department of Developmental Psychology Arifin, Bustanul; University of Groningen, Pharmacoepidemiology and Pharmacoeconomics |
| <b>Primary Subject Heading</b>: | Public health                                                                                                                                                                                                                                                                                                                                                                                                                                                                                                                                                                                                                                                                                                                                                                                                                                                                                                                                                                                                                                                                                                                                                                                                                                                                                                      |
| Secondary Subject Heading:      | Epidemiology, Mental health                                                                                                                                                                                                                                                                                                                                                                                                                                                                                                                                                                                                                                                                                                                                                                                                                                                                                                                                                                                                                                                                                                                                                                                                                                                                                        |
| Keywords:                       | COVID-19, MENTAL HEALTH, PUBLIC HEALTH, EPIDEMIOLOGY                                                                                                                                                                                                                                                                                                                                                                                                                                                                                                                                                                                                                                                                                                                                                                                                                                                                                                                                                                                                                                                                                                                                                                                                                                                               |
|                                 |                                                                                                                                                                                                                                                                                                                                                                                                                                                                                                                                                                                                                                                                                                                                                                                                                                                                                                                                                                                                                                                                                                                                                                                                                                                                                                                    |

SCHOLARONE™  
Manuscripts



I, the Submitting Author has the right to grant and does grant on behalf of all authors of the Work (as defined in the below author licence), an exclusive licence and/or a non-exclusive licence for contributions from authors who are: i) UK Crown employees; ii) where BMJ has agreed a CC-BY licence shall apply, and/or iii) in accordance with the terms applicable for US Federal Government officers or employees acting as part of their official duties; on a worldwide, perpetual, irrevocable, royalty-free basis to BMJ Publishing Group Ltd ("BMJ") its licensees and where the relevant Journal is co-owned by BMJ to the co-owners of the Journal, to publish the Work in this journal and any other BMJ products and to exploit all rights, as set out in our [licence](#).

The Submitting Author accepts and understands that any supply made under these terms is made by BMJ to the Submitting Author unless you are acting as an employee on behalf of your employer or a postgraduate student of an affiliated institution which is paying any applicable article publishing charge ("APC") for Open Access articles. Where the Submitting Author wishes to make the Work available on an Open Access basis (and intends to pay the relevant APC), the terms of reuse of such Open Access shall be governed by a Creative Commons licence – details of these licences and which [Creative Commons](#) licence will apply to this Work are set out in our licence referred to above.

Other than as permitted in any relevant BMJ Author's Self Archiving Policies, I confirm this Work has not been accepted for publication elsewhere, is not being considered for publication elsewhere and does not duplicate material already published. I confirm all authors consent to publication of this Work and authorise the granting of this licence.

1  
2  
3  
4  
5  
6  
7  
8  
9

1 **Mental Health and Health-Related Quality of Life among Healthcare Workers in**  
2 **Indonesia during the Coronavirus Disease 2019 Pandemic: A Cross-Sectional**  
3 **Study**

4 **Running title:** HCW mental health and HRQoL during pandemic

5  
6 Adila T. Syamlan<sup>1#</sup>, Sovia Salamah<sup>2,3##</sup>, Firas F. Alkaff<sup>3,4\*</sup>, Yogi E. Prayudi<sup>5</sup>,  
7 Muhammad Kamil<sup>6</sup>, Abyan Irzaldy<sup>7</sup>, Azimatul Karimah<sup>1</sup>, Maarten J. Postma<sup>4,8,9,10,11</sup>,  
8 Fredrick D. Purba<sup>12</sup>, Bustanul Arifin<sup>8,13,14</sup>

9  
10 <sup>1</sup>Department of Psychiatry, Faculty of Medicine Universitas Airlangga – Dr. Soetomo  
11 General Academic Hospital, Surabaya, Indonesia

12 <sup>2</sup>Department of Public Health and Preventive Medicine, Faculty of Medicine  
13 Universitas Airlangga, Surabaya, Indonesia

14 <sup>3</sup>Department of Internal Medicine, University Medical Center Groningen, Groningen,  
15 The Netherlands

16 <sup>4</sup>Division of Pharmacology and Therapy, Department of Anatomy, Histology, and  
17 Pharmacology, Faculty of Medicine Universitas Airlangga, Surabaya, Indonesia

18 <sup>5</sup>Faculty of Medicine Universitas Airlangga, Surabaya, Indonesia

19 <sup>6</sup>Department of Neurosurgery, Faculty of Medicine Universitas Airlangga, Surabaya,  
20 Indonesia

21 <sup>7</sup>Karolinska Institute, Solna, Sweden

22 <sup>8</sup>Department of Health Sciences, University of Groningen, University Medical Center  
23 Groningen, Groningen, The Netherlands

24 <sup>9</sup>Institute of Science in Healthy Ageing & healthcaRE (SHARE), University Medical  
25 Center Groningen, University of Groningen, Groningen, The Netherlands

1  
2  
3 26 <sup>10</sup>Unit of Pharmacotherapy, Epidemiology and Economics (PTE2), Department of  
4  
5  
6 27 Pharmacy, University of Groningen, Groningen, The Netherlands

7  
8 28 <sup>11</sup>Department of Economics, Econometrics and Finance, Faculty of Economics &  
9  
10 29 Business, University of Groningen, Groningen, The Netherlands

11  
12 30 <sup>12</sup>Department of Developmental Psychology, Faculty of Psychology, Universitas  
13  
14 31 Padjadjaran, Bandung, Indonesia

15  
16  
17 32 <sup>13</sup>Pharmacy Faculty, Universitas Hasanuddin, Makassar, Sulawesi Selatan, Indonesia

18  
19 33 <sup>14</sup>Faculty of Medicine, Public Health and Nursing, Universitas Gadjah Mada,  
20  
21 34 Yogyakarta, Indonesia

22  
23  
24 35 #Co-first author, these authors contributed equally to this work.

25  
26 36 \*Corresponding authors:

27  
28 37 Sovia Salamah

29  
30 38 Hanzeplein 1, 9713GZ, Groningen, The Netherlands / Jl. Mayjen Prof. Dr. Moestopo  
31  
32 39 No 47, Surabaya, East Java 60132, Indonesia.

33  
34 40 Email: [s.salamah@umcg.nl](mailto:s.salamah@umcg.nl) / [sovia.salamah@fk.unair.ac.id](mailto:sovia.salamah@fk.unair.ac.id)

35  
36 41 Telephone: +31651114511 / +6282244485448

37  
38  
39 42  
40  
41 43 Firas Farisi Alkaff

42  
43 44 Hanzeplein 1, 9713GZ, Groningen, The Netherlands / Jl. Mayjen Prof. Dr. Moestopo  
44  
45 45 No 47, Surabaya, East Java 60132, Indonesia.

46  
47 46 Email: [f.f.alkaff@umcg.nl](mailto:f.f.alkaff@umcg.nl) / [firasfarisialkaff@fk.unair.ac.id](mailto:firasfarisialkaff@fk.unair.ac.id)

48  
49 47 Telephone: +31616383945 / +6281330101993

50  
51  
52 48  
53  
54 49 **Keywords:** anxiety; COVID-19; depression; Indonesia; Quality of life; stress

55  
56  
57 50 **Word count:** 3444 words

1  
2  
3 51 **Abstract**  
4

5 52 **Objectives:** Healthcare workers (HCWs) are the front lines during the coronavirus  
6 disease 2019 (COVID-19) pandemic. They are more exposed to COVID-19 than other  
7  
8 53 professions. Studies from other countries have shown that the mental health and  
9  
10 54 health-related quality of life (HRQoL) of HCWs were affected during this pandemic.  
11  
12 55 However, studies on mental health in Indonesia remain scarce and no study has  
13  
14 56 evaluated the HRQoL among HCWs. Thus, this study was designed to explore the  
15  
16 57 mental health status and HRQoL among HCWs in Indonesia.  
17  
18 58

19  
20 59 **Design:** This was a cross-sectional study.  
21

22  
23 60 **Setting:** This was an open online survey in Indonesia conducted from December 2020  
24  
25 61 to February 2021.  
26  
27 62

28 62 **Participants:** This study involved HCWs who worked during the COVID-19  
29  
30 63 pandemic. Of the 502 respondents who filled the online questionnaire, 392 were  
31  
32 64 included in the analysis.  
33  
34 65

35 65 **Outcomes:** Mental health status was measured using the 21-item Depression, Anxiety,  
36  
37 66 and Stress Scale (DASS-21) and HRQoL was measured using the second version of  
38  
39 67 the 12-item Short-Form Health Survey (SF12v2).  
40  
41 68

42 68 **Results:** The prevalence of depression, anxiety, and stress among HCWs was 29.4%,  
43  
44 69 44.9%, and 31.8%, respectively. Using the SF12v2 questionnaire, 354 (90.3%) HCWs  
45  
46 70 were found to have impaired physical component and 156 (39.8%) HCWs have  
47  
48 71 impaired mental component.  
49  
50 72

51 72 **Conclusion:** The prevalence of mental health problems among HCWs was high in  
52  
53 73 Indonesia. HRQoL, particularly the physical component, was affected in most HCWs.  
54  
55 74 Thus, policymakers should give more attention to the mental health and HRQoL of  
56  
57 75 HCWs during the COVID-19 pandemic.  
58  
59  
60



76

**77 Strength and limitations of this study**

- 78 • This study assessed the prevalence of and determinants for mental health  
79 problems and impaired Health-related quality of life (HRQoL) among  
80 healthcare workers (HCWs) during the coronavirus disease 2019 (COVID-19)  
81 pandemic in Indonesia.
- 82 • We performed univariate logistic regression analysis, followed by multivariate  
83 logistic regression analysis using backward selection, to determine the  
84 determinants for mental health problems and impaired HRQoL.
- 85 • The cross-sectional nature of this study could not identify temporal  
86 relationships between the course of the COVID-19 pandemic and mental  
87 health problems and HRQoL impairment.
- 88 • Because of the nonprobability purposive sampling method, generalization of  
89 this study's findings to all HCWs in Indonesia should be done cautiously.

## 90 **Background**

91 Coronavirus disease 2019 (COVID-19), caused by severe acute respiratory syndrome  
92 coronavirus 2 (SARS-CoV-2), emerged in December 2019 in Wuhan, Hubei Province  
93 of China.<sup>1</sup> This virus is related to SARS-CoV-1, which was the cause of SARS in  
94 2002 and Middle East Respiratory Syndrome (Mers-CoV) in 2012.<sup>2</sup> As of March 11,  
95 2020, the World Health Organization characterized COVID-19 as a pandemic.<sup>3</sup> To  
96 this date, over 428 million were affected by this disease with over 5 million of deaths  
97 worldwide.<sup>4</sup> In Indonesia, the first official case of COVID-19 was on March 2, 2020.<sup>5</sup>  
98 After that, the number of reported cases in Indonesia has been exponentially  
99 increasing. Currently, over 3.9 million individuals are positive for the disease with  
100 more than 121,000 deaths.<sup>6</sup>

101  
102 Healthcare workers (HCWs) are the front lines during the COVID-19 pandemic and  
103 thus are more exposed to COVID-19 than other professions. Worldwide, the total  
104 number of deaths among HCWs is over 155 ,000.<sup>7</sup> In Indonesia, the total number of  
105 deaths among HCWs is 2,066 to this date.<sup>8</sup> Although the reported mortality rate  
106 among HCWs is lower than that in the general population,<sup>9, 10</sup> higher levels of mental  
107 health problems were found among HCWs.<sup>11</sup> Heavy workload and lack of personal  
108 protective equipment (PPE) are highlighted as profession-related contributing risk  
109 factors.<sup>12</sup>

110  
111 A recently published systematic review has revealed that the prevalence of depression  
112 and anxiety among HCWs during the COVID-19 pandemic was 37% and 40%,  
113 respectively.<sup>13</sup> This prevalence was higher than that observed in non-pandemic  
114 situations, where the prevalence of depression and anxiety was 11.3% and 17.3%,

1  
2  
3 115 respectively.<sup>14</sup> However, no study from Indonesia was included in this  
4  
5 116 meta-analysis.<sup>13, 15</sup> To this date, studies on mental health among HCWs in Indonesia  
6  
7 117 remain scarce and are either focusing on a certain HCW profession or conducted only  
8  
9  
10 118 in one part of the country.<sup>16-20</sup> Other than that, all studies have adopted a  
11  
12 119 cross-sectional study design, thus only illustrating a particular moment of the  
13  
14 120 pandemic. However, no study has been conducted during the later stage of the  
15  
16  
17 121 COVID-19 pandemic in Indonesia when the number of cases and deaths was  
18  
19 122 increasing.<sup>21</sup>

20  
21  
22 123  
23  
24 124 Besides mental health problems, health-related quality of life (HRQoL) is also  
25  
26 125 affected during the COVID-19 pandemic.<sup>22</sup> Currently, few published studies have  
27  
28 126 evaluated the HRQoL of HCWs during the COVID-19 pandemic<sup>23-31</sup>; however, no  
29  
30 127 such studies have been conducted in Indonesia. Thus, this study was designed to  
31  
32  
33 128 explore the mental health status and HRQoL among HCWs in Indonesia and identify  
34  
35 129 the determining factors.  
36  
37  
38  
39  
40  
41  
42  
43  
44  
45  
46  
47  
48  
49  
50  
51  
52  
53  
54  
55  
56  
57  
58  
59  
60

1  
2  
3 130 **Methods**  
4

5 131 Study design  
6  
7

8 132 This study was a cross-sectional study using an open online questionnaire.  
9  
10 133 SurveyMonkey® was used as the survey platform. Using this survey platform, each  
11  
12 134 respondent can only participate in the questionnaire once because the Internet  
13  
14 135 Protocol address was used to identify potential duplicate entries from the same  
15  
16 136 respondent. The questionnaire link was distributed through social media, that is,  
17  
18 137 WhatsApp and Instagram, the most popular and accessible social media platforms in  
19  
20 138 Indonesia.  
21  
22

23  
24 139  
25  
26 140 Participants  
27

28 141 The study participants were HCWs in Indonesia and were recruited using a  
29  
30 142 nonprobability purposive snowball sampling technique. The inclusion criteria were as  
31  
32 143 follows: HCWs who were actively working during the COVID-19 pandemic and  
33  
34 144 agreed to participate in this study. The HCWs aimed to be included in this study were  
35  
36 145 doctor, dentist, midwife, pharmacist, nutritionist, physiotherapist, laboratory analyst,  
37  
38 146 acupuncturist, health educator, and hospital administrator.<sup>32</sup> Informed consent was  
39  
40 147 obtained from each respondent. Data collection was conducted from December 2020  
41  
42 148 to February 2021. The minimum required sample size was calculated using  
43  
44 149 EpiInfo™.<sup>33</sup> According to the Indonesia National Disaster Management Agency, the  
45  
46 150 total number of HCWs in Indonesia was 528,714 on September 2020.<sup>34</sup> Using an  
47  
48 151 expected frequency of 50%, acceptable margin of error of 5%, and design effect of  
49  
50 152 1.0, a minimum of 384 samples were needed to obtain sufficient statistical power,  
51  
52 153 assuming 95% confidence intervals.  
53  
54  
55  
56  
57

58 154  
59  
60

1  
2  
3 155 Ethics  
4

5 156 This study was performed according to the principles of the Declaration of Helsinki  
6  
7 157 and approved by the relevant Institutional Review Board. The data were kept  
8  
9 158 confidential and no personally identifiable information was reported.  
10  
11

12 159

13  
14  
15 160 Instruments  
16

17 161 The questionnaire contained 60 questions, separated into 4 pages. The time needed to  
18  
19 162 complete the questionnaire was 15-20 minutes. All questions were mandatory to  
20  
21 163 answer, and respondents could not move to the next page if all questions on the  
22  
23 164 previous page had not been answered. Before submitting the questionnaire, the  
24  
25 165 respondents could review and change their answers.  
26  
27

28 166

29  
30 167 The background and demographic characteristics of each respondent were obtained  
31  
32 168 using a questionnaire that contained questions on the respondent's gender, age,  
33  
34 169 marital status, specific job, workplace setting during the pandemic, workplace  
35  
36 170 location, working experience as an HCW before the COVID-19 pandemic, working  
37  
38 171 hours per week, monthly income, history of COVID-19 infection, comorbidities,  
39  
40 172 availability of personal protective equipment in the workplace, verbal or physical  
41  
42 173 intimidation in the workplace, intimidation from the society outside the workplace,  
43  
44 174 support from the workplace if there is any intimidation, willingness to work during  
45  
46 175 the COVID-19 pandemic, and reason for working during the COVID-19 pandemic.  
47  
48

49 176

50  
51  
52 177 Mental health was measured using the Indonesian version of 21-item Depression,  
53  
54 178 Anxiety, and Stress Scale (DASS-21).<sup>35</sup> This questionnaire has been adapted to  
55  
56 179 Bahasa Indonesia previously and showed good validity and reliability.<sup>36</sup> The  
57  
58  
59  
60

1  
2  
3 180 DASS-21 is a self-administered questionnaire consisting of depression, anxiety, and  
4  
5 181 stress subscales, each composed of 7 items. Every item could have a score ranging  
6  
7 182 from 0, indicating a lack of symptoms in the past week, to 3, indicating the presence  
8  
9 183 of symptoms for almost every day in the past week. To calculate the final score of  
10  
11 184 each subscale, the score was multiplied by 2. The minimum final score was 0 and the  
12  
13 185 maximum score was 42 for each subscale. Based on the total score, mental health can  
14  
15 186 be categorized into normal or mild, moderate, severe, or extremely impaired (**Table**  
16  
17 187 **1**).<sup>35</sup>  
18  
19  
20  
21  
22  
23

24 189 HRQoL was evaluated using the second version of the 12-item Short-Form Health  
25  
26 190 Survey (SF12v2) (license number: QM054173).<sup>37</sup> The use of SF12v2 to evaluate  
27  
28 191 HRQoL was based on the consideration that it can be used in nonpatient populations  
29  
30 192 and has fewer questions than other HRQoL questionnaires. The SF12v2 has been  
31  
32 193 adapted to Bahasa Indonesia previously and showed good validity and reliability.<sup>38</sup>  
33  
34 194 This questionnaire measures both the physical and mental health components, which  
35  
36 195 are divided into 8 health domain scales, that is, physical functioning (PF), role  
37  
38 196 physical (RP), bodily pain (BP), general health (GH), vitality (VT), social functioning  
39  
40 197 (SF), role emotional (RE), and mental health (MH). PF, RP, BP, and GH have the  
41  
42 198 greatest physical component among the health domains, whereas VT, SF, RE, and  
43  
44 199 MH have the greatest mental component.<sup>37</sup> The explanations of each domain scale  
45  
46 200 have been described elsewhere.<sup>38</sup> The SF12v2 was scored using Optum® PRO CoRE  
47  
48 201 software (Optum PROCoRE 1.3 Smart Measurement System. Optum Inc., USA). The  
49  
50 202 software will generate the score for each health domain and the summary scores of the  
51  
52 203 physical and mental components. Scores of less than 47 indicate significant  
53  
54 204 impairment in the associated health domain.<sup>37</sup>  
55  
56  
57  
58  
59  
60

205

206 Data analysis

207 Only completed questionnaires were included in the data analysis. Acquired data were  
208 analyzed using IBM SPSS Statistics for Windows version 25.0. (IBM Corp., Armonk,  
209 NY, USA). Differences with  $p$  values  $< .05$  were considered statistically significant.  
210 The one-sample Kolmogorov-Smirnov test was used to evaluate the data distribution.  
211 Normally distributed data was presented as mean  $\pm$  SD, skewed data was presented as  
212 median [interquartile range (IQR)], and nominal data was presented as frequency (%).  
213 To discover the determinants of mental health and HRQoL, multiple logistic  
214 regression analysis using backward selection was used. Data analysis was conducted  
215 in two phases. In the first phase, univariate logistic regression was used to identify  
216 independent variables associated with mental health status and HRQoL. Variables  
217 with  $p$  values  $< .1$  were included in the next phase. In the second phase, multivariate  
218 logistic regression using backward selection was used. Variables with  $p$  values  $< .05$   
219 from multivariate regression analysis were considered as the determinants.<sup>39</sup> During  
220 the analysis to determine the determinants, mental health variables were recategorized  
221 into dichotomous (normal or not) variables with the cutoff as follows: 9 for  
222 depression, 6 for anxiety, and 10 for stress.<sup>35</sup>

223

224 Patient and public involvement

225 Patients and the public were not involved in this study.

## 226 **Results**

227 Of the 502 HCWs who accessed the online questionnaire, 392 were included for the  
228 analysis. The total response rate for this study was 78% (**Figure 1**). The detailed  
229 sociodemographic characteristics of the respondents are summarized in **Table 2**.

### 231 Mental Health

232 The median scores of the depression, anxiety, and stress subscales were 6 [2–10], 6  
233 [2–12], and 10 [4–10], respectively. Of the 392 respondents, 119 (29.4%) experienced  
234 depression, 176 (44.9%) experienced anxiety, and 164 (31.8%) experienced stress  
235 (**Figure 2**). Stratified by gender, the prevalence of depression, anxiety, and stress  
236 among male HCWs was 27 (21.3%), 42 (33.1%), and 45 (35.4%), respectively,  
237 whereas the prevalence of depression, anxiety, and stress among female HCWs was  
238 92 (34.7%), 134 (50.6%), and 119 (44.9%), respectively (**Supplementary Figure 1**  
239 **and 2**).

241 To find the determinants of depression among HCWs, multivariate logistic regression  
242 analysis was performed by including all variables that had a *p* value of < .1 in the  
243 univariate analysis (**Supplementary Table 1**). Female HCWs, HCWs who did not  
244 receive support from the workplace when intimidated by the patients or patients'  
245 family members because of COVID-19-related issues, and HCWs that worked during  
246 the pandemic because they were bound by working contracts were more likely to be  
247 depressed. Meanwhile, HCWs with working experience of more than 3 years in  
248 healthcare facilities were less likely to be depressed (**Table 3**).

249



1  
2  
3 250 To find the determinants of anxiety among HCWs, multivariate logistic regression  
4  
5 251 analysis was performed by including all variables that had a  $p$  value of  $< .1$  in the  
6  
7  
8 252 univariate analysis (**Supplementary Table 2**). Female HCWs, HCWs who did not  
9  
10 253 receive support from the workplace when intimidated by the patients or patients'  
11  
12 254 family members, and HCWs who were not willing to work during the COVID-19  
13  
14 255 pandemic were more likely to be anxious. Meanwhile, older HCWs and HCWs who  
15  
16 256 worked in healthcare facilities other than COVID-19 hospitals or referral hospitals for  
17  
18 257 COVID-19 were less likely to be anxious (**Table 4**).  
19  
20  
21  
22 258

23  
24 259 To find the determinants of stress among HCWs, multivariate logistic regression  
25  
26 260 analysis was performed by including all variables that had a  $p$  value of  $< .1$  in the  
27  
28 261 univariate analysis (**Supplementary Table 3**). HCWs who did not receive support  
29  
30 262 from the workplace when intimidated by the patients or patients' family members,  
31  
32 263 HCWs who are not willing to work during the COVID-19 pandemic, and HCWs who  
33  
34 264 worked during the pandemic because of financial matters or because they were bound  
35  
36 265 by working contracts were more likely to be stressed. Meanwhile, older HCWs were  
37  
38 266 less likely to be stressed (**Table 5**).  
39  
40  
41  
42 267

#### 43 268 HRQoL

44  
45  
46 269 The median score of the physical component summary (PCS) was 41.80 [39.15–44.14]  
47  
48 270 and the median score of the mental component summary (MCS) was 49.81 [43.25–  
49  
50 271 55.95]. The detailed scores of the PCS, MCS, and each health domain scale are  
51  
52 272 summarized in **Figure 3**. Of the 392 HCWs, 354 (90.3%) had an impairment in the  
53  
54 273 physical component and 156 (39.8%) had an impairment in the mental component  
55  
56 274 (**Figure 4**).  
57  
58  
59  
60

1  
2  
3 275  
4

5 276 To find the determinants of impaired physical and mental health components among  
6  
7  
8 277 HCWs, multivariate logistic regression analysis was performed by including all  
9  
10 278 variables that had a  $p$  value of  $< .1$  in the univariate analysis (**Supplementary Table**  
11  
12 279 **4 and 5**). However, no determinants were found in the multivariate analysis.  
13  
14  
15  
16  
17  
18  
19  
20  
21  
22  
23  
24  
25  
26  
27  
28  
29  
30  
31  
32  
33  
34  
35  
36  
37  
38  
39  
40  
41  
42  
43  
44  
45  
46  
47  
48  
49  
50  
51  
52  
53  
54  
55  
56  
57  
58  
59  
60

For peer review only

## 280 **Discussion**

281 The results of this study provided additional information on the mental health  
282 conditions and HRQoL among Indonesian HCWs. Moreover, this study identified  
283 several significant determinants of stress, anxiety, and depression among HCWs. This  
284 may also act as a guide for relevant actions that can be taken by relevant authorities to  
285 provide preventive efforts regarding mental health matters.

### 287 Mental health

288 The prevalence of depression, anxiety, and stress observed in this study was 29.4%,  
289 44.9%, and 31.8%, respectively, which were higher than that reported in previous  
290 studies from Indonesia that also used the DASS-21 as the study instrument, wherein  
291 the prevalence was 2.4–13.2% for depression, 6.8–20.6% for anxiety, and 5.7–11%  
292 for stress.<sup>16, 17, 19</sup> The discrepancy between this study and previous studies might be  
293 attributed to the time difference in data collection. In this study, data collection was  
294 performed in the later time of the pandemic, whereas in previous studies, data  
295 collection was performed at the beginning of the pandemic.

297 Indeed, a recent systematic review and meta-analysis of longitudinal studies has  
298 shown that the prevalence of mental health problems was higher only at the beginning  
299 of the pandemic and continuously declined after 2 months.<sup>40</sup> In HCWs, the high  
300 prevalence of mental health problems at the beginning of the pandemic may be  
301 because of the sudden escalation of the workload and lack of understanding of the  
302 disease. At the later stage, as there are more information about the disease and HCWs  
303 have adapted to the new workload, the prevalence of mental health problems  
304 decreased.<sup>41</sup> However, note that most studies included in that review were from

1  
2  
3 305 countries where the peak of the first wave occurred at the beginning of the pandemic  
4  
5 306 and that there is a lack of studies conducted in the later period of the pandemic when  
6  
7 307 the number of cases surged again.<sup>40, 41</sup> In a single-center longitudinal study in Italy,  
8  
9 308 the prevalence of anxiety and stress remained high even during the third wave,  
10  
11 309 whereas the prevalence of depression increased from the first wave to the third  
12  
13 310 wave.<sup>42</sup> As the number of cases increases, the workload of the HCWs also increases.  
14  
15 311 This will negatively affect their mental health condition.<sup>43, 44</sup> In Indonesia, the peak of  
16  
17 312 the first wave occurred not at the beginning of the pandemic but during the data  
18  
19 313 collection of this study, that is, from December 2020 to February 2021.<sup>21</sup> This  
20  
21 314 explained the higher prevalence of mental health problems in this study than in  
22  
23 315 previous studies.  
24  
25  
26  
27  
28  
29  
30

31 317 Several studies were conducted during the same period as this study. Ménard et al  
32  
33 318 (2022) have shown that the prevalence of depression, anxiety, and stress among  
34  
35 319 Canadian HCWs was 14.4%, 21.8%, and 13.5%, respectively.<sup>45</sup> The lower prevalence  
36  
37 320 in Canada might be explained by the difference in the healthcare systems. Different  
38  
39 321 healthcare systems across countries can lead to differences in the prevalence of mental  
40  
41 322 health problems among HCWs.<sup>46</sup> Unlike Canada, the capacity of the current  
42  
43 323 Indonesia's healthcare system to respond to the COVID-19 pandemic is far from  
44  
45 324 adequate.<sup>47</sup> Another study from Italia has revealed that the prevalence of depression,  
46  
47 325 anxiety, and stress was 63%, 31%, and 80%, respectively.<sup>42</sup> The higher prevalence in  
48  
49 326 that study might be explained by the difference in the study population where that  
50  
51 327 study only included frontline HCWs (intensivist) caring exclusively for COVID-19  
52  
53 328 patients, whereas the HCWs in this study also treat non-COVID-19 patients and some  
54  
55 329 of them were not frontline HCWs. It has been shown previously that frontline HCWs  
56  
57  
58  
59  
60

1  
2  
3 330 and those who worked in the intensive care unit during the COVID-19 pandemic were  
4  
5 331 more likely to develop mental health problems.<sup>48, 49</sup>  
6  
7  
8 332

9  
10 333 In this study, the prevalence of depression, anxiety, and stress was higher in female  
11  
12 334 HCWs than that in male HCWs (**Supplementary Figure 1 and 2**). Moreover, the  
13  
14 335 female sex was an independent risk factor for depression and anxiety (**Table 3 and 4**).  
15  
16 336 Similarly, other studies have also reported gender differences in mental health  
17  
18 337 problems among HCWs during the COVID-19 pandemic, where it is more prevalent  
19  
20 338 in female HCWs.<sup>50, 51</sup> This can be because females have higher rates of mood and  
21  
22 339 anxiety disorders due to a higher mean level of internalizing and potentially by the  
23  
24 340 influence of sex hormones.<sup>52, 53</sup>  
25  
26  
27  
28 341

29  
30 342 A previous study in Indonesia among nurses who worked during the COVID-19  
31  
32 343 pandemic has shown that rejection from family and/or neighbors is a risk factor for  
33  
34 344 depression, anxiety, and stress.<sup>17</sup> We also found a similar finding where intimidation  
35  
36 345 from society was a risk factor for depression, anxiety, and stress in the univariate  
37  
38 346 analysis (**Supplementary Tables 1, 2, and 3**). However, this variable lost its  
39  
40 347 significance in the multivariate analysis, whereas workplace support towards potential  
41  
42 348 intimidation was shown to lower the risk of depression, anxiety, and stress. This  
43  
44 349 indicates that the workplace environment plays a more substantial role in mental  
45  
46 350 health. Havaei et al. (2021) have found that negative ratings of workplace conditions  
47  
48 351 such as workplace relations, workplace safety, organizational support, and  
49  
50 352 preparedness were associated with poor mental health outcomes during the  
51  
52 353 COVID-19 pandemic.<sup>54</sup> A narrative review focusing on the mental health of HCWs  
53  
54 354 during the COVID-19 pandemic has also stated that intrinsic high-risk professional,  
55  
56  
57  
58  
59  
60

1  
2  
3 355 organizational factors such as lack of workplace support, and vulnerable workers such  
4  
5 356 as frontline HCWs are at a higher risk of mental issues during the pandemic.<sup>55</sup>  
6  
7  
8 357

9  
10 358 HRQoL

11  
12 359 To this date, many established questionnaires can be used to assess HRQoL. In  
13  
14 360 previously published studies on HRQoL among HCWs during the COVID-19  
15  
16 361 pandemic, several HRQoL questionnaires were used, that is, WHOQOL-BREF,<sup>23, 27, 29</sup>  
17  
18 362 EQ-5D,<sup>30, 31</sup> SF36,<sup>24</sup> and SF12.<sup>28</sup> Since we used the SF12v2 to evaluate HRQoL in  
19  
20 363 this study, we argue that comparing our findings with those of previous studies that  
21  
22 364 have used either the SF12 or SF36 is essential. The PCS and MCS scores in previous  
23  
24 365 studies were higher than those in this study,<sup>24, 28</sup> indicating that HRQoL in previous  
25  
26 366 studies was better. Moreover, we found that 39.8% of the HCWs included in this  
27  
28 367 study had an impairment in the mental component and 90.3% had an impairment in  
29  
30 368 the physical component. However, we cannot compare our findings with those of  
31  
32 369 previous studies since they did not present the prevalence of HCWs with impaired  
33  
34 370 physical and mental health components.<sup>24, 28</sup>  
35  
36  
37  
38  
39  
40  
41

42 372 The worse HRQoL in this study might be caused by the time difference of the study  
43  
44 373 period where previous studies were conducted at the beginning of the pandemic and  
45  
46 374 this study was conducted in the later time of the pandemic.<sup>24, 28</sup> Similar to the mental  
47  
48 375 health status, we would argue that the HRQoL of HCWs at the beginning of the  
49  
50 376 pandemic was not as affected as that at the later period. The number of COVID-19  
51  
52 377 patients at the later period was significantly higher than at the beginning of the  
53  
54 378 pandemic.<sup>6</sup> This increased number of patients will increase the workload of HCWs,  
55  
56 379 even if the working hour is not prolonged. Over time, increasing workload will lead to  
57  
58  
59  
60

1  
2  
3 380 physical exhaustion of HCWs. Moreover, the number of deaths of COVID-19 patients  
4  
5 381 increases over time. Constant exposure to dealing with dying and death, in addition to  
6  
7 382 the high workload, is considered as an occupational stressor.<sup>56, 57</sup>  
8  
9

10 383

### 11 384 **Study limitations**

12  
13  
14 385 This study has some limitations to consider. First, the study design was  
15  
16 386 cross-sectional study, whereas the prevalence of mental health problems during the  
17  
18 387 COVID-19 pandemic is dynamic. Second, as the sampling technique used in this  
19  
20 388 study was nonprobability purposive snowball sampling and that only those who had  
21  
22 389 internet access and spare time can enroll in this study, this study was prone to  
23  
24 390 selection bias. Furthermore, although the number of respondents in this study had  
25  
26 391 surpassed the minimum required number of samples, the number of respondents was  
27  
28 392 small compared with the total number of HCWs in Indonesia. Therefore,  
29  
30 393 generalization of this study's findings to all HCWs in Indonesia should be done  
31  
32 394 cautiously. Third, the respondents were not only frontline HCWs but also second-line  
33  
34 395 HCWs, and they worked not only in COVID-19 hospitals but also in other healthcare  
35  
36 396 sectors. This may underestimate the prevalence of mental health problems. Fourth, the  
37  
38 397 diagnosis of depression, anxiety, stress, and HRQoL impairment in this study was  
39  
40 398 based on self-reported questionnaires. This may also underestimate the prevalence of  
41  
42 399 mental health problems. Fifth, 78 (16%) respondents accessed the online  
43  
44 400 questionnaire but did not finish it. The possible explanation for this high loss is  
45  
46 401 because it takes quite a long time (approximately 15–20 minutes) to complete the  
47  
48 402 questionnaire.  
49  
50  
51  
52  
53  
54  
55  
56  
57  
58  
59  
60

## 403 **Conclusion**

404 This is the first study that evaluated the prevalence of and determinants for both  
405 mental health status and HRQoL during the COVID-19 pandemic in Indonesia. The  
406 prevalence of depression, anxiety, and stress among HCWs was 29.4%, 44.9%, and  
407 31.8%, respectively, whereas the prevalence of impaired HRQoL was 90.3% for PCS  
408 and 39.8% for MCS. The results of this study suggest that the workplace environment  
409 is where interventions to prevent and mitigate mental issues are most needed.  
410 Additionally, more attention is also needed for female HCWs, since female HCWs are  
411 at a higher risk of developing mental health issues. Based on our findings, we  
412 recommend that more attention towards HCWs should be given by the policymakers  
413 in Indonesia. This can be done by providing psychological support and also by  
414 assigning sufficient number of security guards or policies in healthcare facilities in  
415 order to provide a safer workplace. Studies with larger sample sizes and periodical  
416 evaluation may further contribute to adequately monitor the mental health and  
417 HRQoL of HCWs throughout this pandemic and develop corresponding support and  
418 interventions.

419  
420  
421 **Contributions:** ATS, SS, FFA, MK, MJP, FDP, and BA were involved in the  
422 conceptualization and the design of the study. ATS, SS, FFA, YEP, MK, AK, and BA  
423 carried out the data collection. SS, FFA, and AI conducted the analysis, and FDP and  
424 BA were the main consultants in the data interpretation. ATS, SS, FFA, and AI  
425 drafted the manuscript, and all the authors revised it. All authors read and approved  
426 the final manuscript to be submitted.



1  
2  
3 427 **Funding:** This research received no specific grant from any funding agency in the  
4  
5 428 public, commercial or not-for-profit sectors.  
6

7 429 **Competing interests:** MJP received grants and honoraria from various  
8  
9 430 pharmaceutical companies, all fully unrelated to this research. Other authors have no  
10  
11 431 conflict of interest to declare.  
12

13  
14 432 **Ethics approval:** Approval was granted by the Institutional Review Board of Faculty  
15  
16 433 of Medicine Universitas Airlangga (Date 5 October 2020 / No.  
17  
18 434 251/EC/KEPK/FKUA/2020).  
19

20  
21 435 **Acknowledgement:** The authors would like to thank QualityMetric Incorporated,  
22  
23 436 LLC for giving a free SF12v2® licensing package for this study.  
24

25  
26 437 **Data sharing statement:** Data are available upon reasonable request.  
27  
28  
29  
30  
31  
32  
33  
34  
35  
36  
37  
38  
39  
40  
41  
42  
43  
44  
45  
46  
47  
48  
49  
50  
51  
52  
53  
54  
55  
56  
57  
58  
59  
60

438 **References**

- 439 1. Khan S, Siddique R, Bai Q, et al. Coronaviruses disease 2019 (COVID-19): Causative agent, mental  
440 health concerns, and potential management options. *J Infect Public Health*. 2020;13(12):1840-4.
- 441 2. Fauci AS, Lane HC, Redfield RR. Covid-19 - Navigating the Uncharted. *N Engl J Med*.  
442 2020;382(13):1268-9.
- 443 3. World Health Organization. Rolling updates on coronavirus disease (COVID-19) 2020 [Access  
444 date 12 September 2021]. Available from:  
445 <https://www.who.int/emergencies/diseases/novel-coronavirus-2019/events-as-they-happen>.
- 446 4. World Health Organization. WHO Coronavirus (COVID-19) Dashboard 2022 [Access date 25  
447 February 2022]. Available from: <https://covid19.who.int/>.
- 448 5. World Health Organization Indonesia. Coronavirus Disease 2019 (COVID-19) Situation Report - 1  
449 2020 [Access date 12 September 2021]. Available from:  
450 <https://www.who.int/indonesia/news/novel-coronavirus/situation-reports>.
- 451 6. World Health Organization Indonesia. Coronavirus Disease 2019 (COVID-19) Situation Report - 87  
452 2022 [Access date 25 February 2022]. Available from:  
453 <https://www.who.int/indonesia/news/novel-coronavirus/situation-reports>.
- 454 7. World Health Organization. Director-General's opening remarks at the World Health Assembly -  
455 24 May 2021 2021 [Access date 12 September 2021]. Available from:  
456 <https://www.who.int/director-general/speeches/detail/director-general-s-opening-remarks-at-the-w>  
457 [orld-health-assembly--24-may-2021](https://www.who.int/director-general/speeches/detail/director-general-s-opening-remarks-at-the-w).
- 458 8. Lapor Covid-19. Pusara Digital Tenaga Kesehatan Indonesia. 2022 [Access date 25 February  
459 2022]. Available from: <https://nakes.laporcovid19.org/>.
- 460 9. Bandyopadhyay S, Baticulon RE, Kadhun M, et al. Infection and mortality of healthcare workers  
461 worldwide from COVID-19: a systematic review. *BMJ Glob Health*. 2020;5(12).
- 462 10. Diez-Manglano J, Solis-Marquinez MN, Alvarez Garcia A, et al. Healthcare workers hospitalized  
463 due to COVID-19 have no higher risk of death than general population. Data from the Spanish  
464 SEMI-COVID-19 Registry. *PLoS One*. 2021;16(2):e0247422.
- 465 11. Vindegaard N, Benros ME. COVID-19 pandemic and mental health consequences: Systematic  
466 review of the current evidence. *Brain Behav Immun*. 2020;89:531-42.
- 467 12. De Kock JH, Latham HA, Leslie SJ, et al. A rapid review of the impact of COVID-19 on the mental  
468 health of healthcare workers: implications for supporting psychological well-being. *BMC Public Health*.  
469 2021;21(1):104.
- 470 13. Saragih ID, Tonapa SI, Saragih IS, et al. Global prevalence of mental health problems among  
471 healthcare workers during the Covid-19 pandemic: A systematic review and meta-analysis. *Int J Nurs*  
472 *Stud*. 2021;121:104002.
- 473 14. Weaver MD, Vetter C, Rajaratnam SMW, et al. Sleep disorders, depression and anxiety are  
474 associated with adverse safety outcomes in healthcare workers: A prospective cohort study. *J Sleep*  
475 *Res*. 2018;27(6):e12722.
- 476 15. Salari N, Khazaie H, Hosseini-Far A, et al. The prevalence of stress, anxiety and depression  
477 within front-line healthcare workers caring for COVID-19 patients: a systematic review and  
478 meta-regression. *Hum Resour Health*. 2020;18(1):100.
- 479 16. Chew NWS, Ngiam JN, Tan BY, et al. Asian-Pacific perspective on the psychological well-being of  
480 healthcare workers during the evolution of the COVID-19 pandemic. *BJPsych Open*. 2020;6(6):e116.
- 481 17. Marthoenis, Maskur, Fathiariani L, et al. Investigating the burden of mental distress among  
482 nurses at a provincial COVID-19 referral hospital in Indonesia: a cross-sectional study. *BMC Nurs*.  
483 2021;20(1):76.
- 484 18. Setiawati Y, Wahyuhadi J, Joestandari F, et al. Anxiety and Resilience of Healthcare Workers  
485 During COVID-19 Pandemic in Indonesia. *J Multidiscip Healthc*. 2021;14:1-8.
- 486 19. Sitanggang FP, Wirawan GBS, Wirawan IMA, et al. Determinants of Mental Health and Practice  
487 Behaviors of General Practitioners During COVID-19 Pandemic in Bali, Indonesia: A Cross-sectional  
488 Study. *Risk Manag Healthc Policy*. 2021;14:2055-64.
- 489 20. Sunjaya DK, Herawati DMD, Siregar AYM. Depressive, anxiety, and burnout symptoms on health  
490 care personnel at a month after COVID-19 outbreak in Indonesia. *BMC Public Health*. 2021;21(1):227.
- 491 21. World Health Organization Indonesia. Coronavirus Disease 2019 (COVID-19) Situation Report - 86  
492 2022 [Access date 11 February 2022]. Available from:

1  
2  
3  
4  
5  
6  
7  
8  
9  
10  
11  
12  
13  
14  
15  
16  
17  
18  
19  
20  
21  
22  
23  
24  
25  
26  
27  
28  
29  
30  
31  
32  
33  
34  
35  
36  
37  
38  
39  
40  
41  
42  
43  
44  
45  
46  
47  
48  
49  
50  
51  
52  
53  
54  
55  
56  
57  
58  
59  
60

- 493 [https://cdn.who.int/media/docs/default-source/searo/indonesia/covid19/external-situation-report-8](https://cdn.who.int/media/docs/default-source/searo/indonesia/covid19/external-situation-report-8-19-january-2022.pdf?sfvrsn=7db37ea6_5)  
494 [6\\_19-january-2022.pdf?sfvrsn=7db37ea6\\_5](https://cdn.who.int/media/docs/default-source/searo/indonesia/covid19/external-situation-report-8-19-january-2022.pdf?sfvrsn=7db37ea6_5).
- 495 22. Melo-Oliveira ME, Sa-Caputo D, Bachur JA, et al. Reported quality of life in countries with cases  
496 of COVID19: a systematic review. *Expert Rev Respir Med*. 2021;15(2):213-20.
- 497 23. Woon LS, Mansor NS, Mohamad MA, et al. Quality of Life and Its Predictive Factors Among  
498 Healthcare Workers After the End of a Movement Lockdown: The Salient Roles of COVID-19 Stressors,  
499 Psychological Experience, and Social Support. *Front Psychol*. 2021;12:652326.
- 500 24. Stojanov J, Malobabic M, Stanojevic G, et al. Quality of sleep and health-related quality of life  
501 among health care professionals treating patients with coronavirus disease-19. *Int J Soc Psychiatry*.  
502 2020:20764020942800.
- 503 25. Celmece N, Menekay M. The Effect of Stress, Anxiety and Burnout Levels of Healthcare  
504 Professionals Caring for COVID-19 Patients on Their Quality of Life. *Front Psychol*. 2020;11:597624.
- 505 26. Suryavanshi N, Kadam A, Dhumal G, et al. Mental health and quality of life among healthcare  
506 professionals during the COVID-19 pandemic in India. *Brain Behav*. 2020;10(11):e01837.
- 507 27. da Costa Matos RA, Akutsu R, Zandonadi RP, et al. Quality of Life Prior and in the Course of the  
508 COVID-19 Pandemic: A Nationwide Cross-Sectional Study with Brazilian Dietitians. *Int J Environ Res*  
509 *Public Health*. 2021;18(5).
- 510 28. Amerio A, Bianchi D, Santi F, et al. Covid-19 pandemic impact on mental health: a web-based  
511 cross-sectional survey on a sample of Italian general practitioners. *Acta Biomed*. 2020;91(2):83-8.
- 512 29. An Y, Yang Y, Wang A, et al. Prevalence of depression and its impact on quality of life among  
513 frontline nurses in emergency departments during the COVID-19 outbreak. *J Affect Disord*.  
514 2020;276:312-5.
- 515 30. Manh Than H, Minh Nong V, Trung Nguyen C, et al. Mental Health and Health-Related  
516 Quality-of-Life Outcomes Among Frontline Health Workers During the Peak of COVID-19 Outbreak in  
517 Vietnam: A Cross-Sectional Study. *Risk Manag Healthc Policy*. 2020;13:2927-36.
- 518 31. Martín J, Padierna Á, Villanueva A, et al. Evaluation of the mental health of health professionals  
519 in the COVID-19 era. What mental health conditions are our health care workers facing in the new  
520 wave of coronavirus? *International Journal of Clinical Practice*. n/a(n/a):e14607.
- 521 32. Laws of The Republic of Indonesia on Healthcare Workers, 36 (2014).
- 522 33. Dean AG, Arner TG, Sunki GG, et al. *Epi Info™*, a database and statistics program for public health  
523 professionals. Atlanta, GA: CDC; 2011.
- 524 34. Badan Nasional Penanggulangan Bencana (National Disaster Management Agency). Peta Jumlah  
525 Tenaga Medis per 100,000 Penduduk Indonesia 2020 [Access date 20 September 2020]. Available  
526 from: <https://bnpb-inacovid19.hub.arcgis.com/app/f881fb2a91584fa5b96871a6bc2eb2e6>.
- 527 35. Lovibond SH, Lovibond PF. *Manual for the Depression Anxiety Stress Scales*. 2nd ed. Sydney,  
528 Australia: Psychology Foundation; 1995.
- 529 36. El-Matury HJ, Lestari FA, Besral. Depression, anxiety and stress among undergraduate students  
530 in jakarta: Examining scores of the depression anxiety and stress scale according to origin and  
531 residency. *Indian Journal of Public Health Research and Development*. 2018;9(2):290-5.
- 532 37. Maruish ME. *User's manual for the SF-12v2 Health Survey*. 3rd ed. Lincoln, RI: QualityMetric  
533 Incorporated; 2012.
- 534 38. Wicaksana AL, Maharani E, Hertanti NS. The Indonesian version of the Medical Outcome Survey -  
535 Short Form 12 version 2 among patients with cardiovascular diseases. *International Journal of Nursing*  
536 *Practice*. 2020;26(2):e12804.
- 537 39. Flynn J, Alkaff FF, Sukmajaya WP, et al. Comparison of WHO growth standard and national  
538 Indonesian growth reference in determining prevalence and determinants of stunting and  
539 underweight in children under five: a cross-sectional study from Musi sub-district. *F1000Res*.  
540 2020;9:324.
- 541 40. Robinson E, Sutin AR, Daly M, et al. A systematic review and meta-analysis of longitudinal cohort  
542 studies comparing mental health before versus during the COVID-19 pandemic in 2020. *J Affect Disord*.  
543 2022;296:567-76.
- 544 41. Liu X, Zhu M, Zhang R, et al. Public mental health problems during COVID-19 pandemic: a  
545 large-scale meta-analysis of the evidence. *Transl Psychiatry*. 2021;11(1):384.
- 546 42. Magnavita N, Soave PM, Antonelli M. A One-Year Prospective Study of Work-Related Mental  
547 Health in the Intensivists of a COVID-19 Hub Hospital. *Int J Environ Res Public Health*.  
548 2021;18(18):9888.

- 1  
2  
3 549 43. Peng R, Zhou W, Zhou D, et al. The Mediating Role of Fatigue Between Mental Health and Its  
4 550 Associated Factors: Evidence From Chinese Healthcare Workers During the COVID-19 Pandemic. *Front*  
5 551 *Psychiatry*. 2021;12:665992.
- 6 552 44. Tiete J, Guatteri M, Lachaux A, et al. Mental Health Outcomes in Healthcare Workers in  
7 553 COVID-19 and Non-COVID-19 Care Units: A Cross-Sectional Survey in Belgium. *Front Psychol*.  
8 554 2020;11:612241.
- 9 555 45. Menard AD, Soucie K, Freeman LA, et al. "My problems aren't severe enough to seek help":  
10 556 Stress levels and use of mental health supports by Canadian hospital employees during the COVID-19  
11 557 pandemic. *Health Policy*. 2022;126(2):106-11.
- 12 558 46. Uphoff EP, Lombardo C, Johnston G, et al. Mental health among healthcare workers and other  
13 559 vulnerable groups during the COVID-19 pandemic and other coronavirus outbreaks: A rapid  
14 560 systematic review. *PLoS One*. 2021;16(8):e0254821.
- 15 561 47. Mahendradhata Y, Andayani N, Hasri ET, et al. The Capacity of the Indonesian Healthcare System  
16 562 to Respond to COVID-19. *Front Public Health*. 2021;9:649819.
- 17 563 48. Wozniak H, Benzakour L, Moullec G, et al. Mental health outcomes of ICU and non-ICU  
18 564 healthcare workers during the COVID-19 outbreak: a cross-sectional study. *Ann Intensive Care*.  
19 565 2021;11(1):106.
- 20 566 49. Hao Q, Wang D, Xie M, et al. Prevalence and Risk Factors of Mental Health Problems Among  
21 567 Healthcare Workers During the COVID-19 Pandemic: A Systematic Review and Meta-Analysis. *Front*  
22 568 *Psychiatry*. 2021;12:567381.
- 23 569 50. Liu S, Yang L, Zhang C, et al. Gender differences in mental health problems of healthcare workers  
24 570 during the coronavirus disease 2019 outbreak. *J Psychiatr Res*. 2021;137:393-400.
- 25 571 51. De Sio S, Buomprisco G, La Torre G, et al. The impact of COVID-19 on doctors' well-being: results  
26 572 of a web survey during the lockdown in Italy. *Eur Rev Med Pharmacol Sci*. 2020;24(14):7869-79.
- 27 573 52. Eaton NR, Keyes KM, Krueger RF, et al. An invariant dimensional liability model of gender  
28 574 differences in mental disorder prevalence: evidence from a national sample. *J Abnorm Psychol*.  
29 575 2012;121(1):282-8.
- 30 576 53. Li SH, Graham BM. Why are women so vulnerable to anxiety, trauma-related and stress-related  
31 577 disorders? The potential role of sex hormones. *Lancet Psychiatry*. 2017;4(1):73-82.
- 32 578 54. Havaei F, Ma A, Staempfli S, et al. Nurses' Workplace Conditions Impacting Their Mental Health  
33 579 during COVID-19: A Cross-Sectional Survey Study. *Healthcare (Basel)*. 2021;9(1).
- 34 580 55. Giorgi G, Lecca LI, Alessio F, et al. COVID-19-Related Mental Health Effects in the Workplace: A  
35 581 Narrative Review. *Int J Environ Res Public Health*. 2020;17(21).
- 36 582 56. Gray-Toft P, Anderson JG. The Nursing Stress Scale: Development of an instrument. *Journal of*  
37 583 *behavioral assessment*. 1981;3(1):11-23.
- 38 584 57. Sjoberg A, Petterson-Stromback A, Sahlen KG, et al. The burden of high workload on the  
39 585 health-related quality of life among home care workers in Northern Sweden. *Int Arch Occup Environ*  
40 586 *Health*. 2020;93(6):747-64.
- 41  
42 587  
43  
44  
45  
46  
47  
48  
49  
50  
51  
52  
53  
54  
55  
56  
57  
58  
59  
60

1  
2  
3 588 **Figure legends**  
4

5 589 **Figure 1.** Flow diagram of study participants.  
6

7  
8 590 **Figure 2.** Prevalence of depression, anxiety, and stress among healthcare workers in  
9  
10 591 each severity level according to DASS-21 scores.  
11

12 592 **Figure 3.** The median [interquartile range] norm-based T-score of summary scores  
13  
14 593 and each health domain scale.  
15

16  
17 594 **Figure 4.** The prevalence of impairment in physical and mental components in  
18  
19 595 general and each health domain scale among healthcare workers. PCS, physical  
20  
21 596 component summary; MCS, mental component summary; PF, physical function; RP,  
22  
23 597 role physical; BP, bodily pain; GH, general health; VT, vitality; SF, social functioning;  
24  
25 598 RE, role emotional; MH, mental health.  
26  
27  
28  
29  
30  
31  
32  
33  
34  
35  
36  
37  
38  
39  
40  
41  
42  
43  
44  
45  
46  
47  
48  
49  
50  
51  
52  
53  
54  
55  
56  
57  
58  
59  
60

1  
2  
3 **Tables**  
4

5 **Table 1.** Cut-off score for mental health status categorization <sup>35</sup>  
6

7

|              | Normal | Mild  | Moderate | Severe | Extremely<br>impaired |
|--------------|--------|-------|----------|--------|-----------------------|
| 8 Depression | 0–9    | 10–12 | 13–20    | 21–27  | 28–42                 |
| 9 Anxiety    | 0–6    | 7–9   | 10–14    | 15–19  | 20–42                 |
| 10 Stress    | 0–10   | 11–18 | 19–26    | 27–34  | 25–42                 |

11  
12  
13  
14  
15  
16  
17  
18

19 <sup>35</sup> Lovibond SH, Lovibond PF. Manual for the Depression Anxiety Stress Scales. 2<sup>nd</sup> ed.  
20 Sydney, Australia: Psychology Foundation; 1995.  
21  
22  
23  
24  
25  
26  
27  
28  
29  
30  
31  
32  
33  
34  
35  
36  
37  
38  
39  
40  
41  
42  
43  
44  
45  
46  
47  
48  
49  
50  
51  
52  
53  
54  
55  
56  
57  
58  
59  
60

**Table 2.** Sociodemographic characteristics of the respondents (n=392)

| <b>Variables</b>                                                                                                       | <b>n (%)</b> |
|------------------------------------------------------------------------------------------------------------------------|--------------|
| <b>Age in years, mean ± SD</b>                                                                                         | 33.5 ± 9.4   |
| <b>Sex</b>                                                                                                             |              |
| Male                                                                                                                   | 127 (32.4)   |
| Female                                                                                                                 | 265 (67.6)   |
| <b>Marital status</b>                                                                                                  |              |
| Single                                                                                                                 | 146 (37.2)   |
| Married                                                                                                                | 128 (32.7)   |
| Married with children                                                                                                  | 118 (30.1)   |
| <b>Job</b>                                                                                                             |              |
| Nurse                                                                                                                  | 52 (13.3)    |
| Midwife                                                                                                                | 19 (4.9)     |
| Doctor                                                                                                                 | 227 (57.9)   |
| Dentist                                                                                                                | 26 (6.6)     |
| Pharmacist                                                                                                             | 20 (5.1)     |
| Others (nutritionist, physiotherapist, laboratory analyst, acupuncturist, health educator, and hospital administrator) | 48 (12.2)    |
| <b>Workplace setting</b>                                                                                               |              |
| COVID-19 hospital or COVID-19 referral hospital                                                                        | 160 (40.8)   |
| Non-COVID-19 hospital                                                                                                  | 76 (19.4)    |
| Primary care facilities                                                                                                | 138 (35.2)   |
| Other healthcare facilities                                                                                            | 18 (4.6)     |
| <b>Workplace island</b>                                                                                                |              |
| Java Island                                                                                                            | 296 (75.5)   |
| Outside Java Island                                                                                                    | 96 (24.5)    |
| <b>Working period during the COVID-19 pandemic</b>                                                                     |              |
| Since the beginning of the pandemic (March–April 2020)                                                                 | 310 (79.1)   |
| In the middle of the pandemic (May 2020 or later)                                                                      | 82 (20.9)    |
| <b>Working experience before the COVID-19 pandemic</b>                                                                 |              |
| Not working                                                                                                            | 36 (9.2)     |
| <1 year                                                                                                                | 67 (17.1)    |
| 1–3 years                                                                                                              | 92 (23.5)    |
| >3 years                                                                                                               | 197 (50.2)   |
| <b>Income during the COVID-19 pandemic</b>                                                                             |              |
| <3 million rupiah/month                                                                                                | 77 (19.7)    |
| 3–5 million rupiah/month                                                                                               | 107 (27.3)   |
| 5–10 million rupiah/month                                                                                              | 111 (28.3)   |
| 10–20 million rupiah/month                                                                                             | 51 (13.0)    |
| >20 million rupiah/month                                                                                               | 46 (11.7)    |
| <b>Working hours per week during the COVID-19 pandemic</b>                                                             |              |
| <40 hours/week                                                                                                         | 180 (45.9)   |
| 40–60 hours/week                                                                                                       | 181 (46.2)   |
| >60 hours/week                                                                                                         | 31 (7.9)     |
| <b>History of COVID-19 infection</b>                                                                                   |              |
| Yes                                                                                                                    | 57 (14.5)    |
| No                                                                                                                     | 335 (85.5)   |
| <b>History of COVID-19 infection in the family</b>                                                                     |              |
| Yes                                                                                                                    | 118 (30.1)   |
| No                                                                                                                     | 274 (69.9)   |



**Any family member died because of COVID-19**

Yes 25 (6.4)  
 No 367 (93.6)

**Having one or more comorbidities**

Yes 276 (70.4)  
 No 116 (29.6)

**PPE availability in the workplace**

Not available or not according to standard 134 (34.2)  
 Available and according to standard 258 (65.8)

**Free routine COVID-19 PCR swab test for HCWs**

No 177 (45.1)  
 Only if there are any symptoms 194 (49.5)  
 Routinely 1–3 times a month 20 (5.1)  
 At least once a week 1 (0.3)

**Verbal intimidation in the workplace**

Never 243 (62.0)  
 Less than once a month 84 (21.4)  
 1–4 times a month 49 (12.5)  
 More than once a week 16 (4.1)

**Physical intimidation in the workplace**

Never 379 (96.7)  
 Less than once a month 8 (2.0)  
 1–4 times a month 3 (0.8)  
 More than once a week 2 (0.5)

**Intimidation from the society outside the workplace**

Never 285 (72.7)  
 Less than once a month 77 (19.7)  
 1–4 times a month 26 (6.6)  
 More than once a week 4 (1.0)

**Workplace support from intimidation**

Yes 322 (82.1)  
 No 70 (17.9)

**How the workplace treats HCWs with COVID-19 symptoms**

Do not know 21 (5.3)  
 HCWs are not allowed to come to work until the test result came out 306 (78.1)  
 HCWs still come to work until the test result came out 65 (16.6)

**HCWs' salary if they are infected with COVID-19**

Do not know 136 (34.7)  
 Reduced by the number of the absence 67 (17.1)  
 Full payment 189 (48.2)

**Willingness to work during the COVID-19 pandemic**

Yes 330 (84.2)  
 No 62 (15.8)

**Reason for HCWs to work during the COVID-19 pandemic**

Feeling responsible 285 (72.7)  
 Financial matters 88 (22.4)  
 Already bound to work contracts 36 (9.2)

---

COVID-19, coronavirus disease 2019; HCWs, healthcare workers; PPE, personal protective equipment; PCR, polymerase chain reaction.



**Table 3.** Determinants of depression among healthcare workers (n=392)

| Variables                                                                           | <i>p</i> value | aOR   | 95%CI         |
|-------------------------------------------------------------------------------------|----------------|-------|---------------|
| <b>Sex</b>                                                                          |                |       |               |
| Male (ref)                                                                          | -              | -     | -             |
| Female                                                                              | .033           | 1.777 | 1.048 – 3.013 |
| <b>Working experience before the COVID-19 pandemic</b>                              |                |       |               |
| Not working (ref)                                                                   | -              | -     | -             |
| <1 year                                                                             | .801           | 0.893 | 0.369 – 2.162 |
| 1-3 years                                                                           | .560           | 1.283 | 0.554 – 2.969 |
| >3 years                                                                            | .008           | 0.333 | 0.147 – 0.753 |
| <b>Workplace support from intimidation</b>                                          |                |       |               |
| Yes (ref)                                                                           | -              | -     | -             |
| No                                                                                  | .002           | 2.493 | 1.383 – 4.494 |
| <b>Work during the COVID-19 pandemic because already bound to working contracts</b> |                |       |               |
| Yes                                                                                 | .015           | 2.578 | 1.198 – 5.547 |
| No (ref)                                                                            | -              | -     | -             |

*p* values < .05 were considered statistically significant. aOR, adjusted odds ratio; COVID-19, coronavirus disease 2019; CI, confidence interval.

**Table 4.** Determinants of anxiety among healthcare workers (n=392)

| <b>Variables</b>                                        | <b>p value</b> | <b>aOR</b> | <b>95%CI</b>  |
|---------------------------------------------------------|----------------|------------|---------------|
| <b>Age</b>                                              | < .001         | 0.938      | 0.913 – 0.964 |
| <b>Sex</b>                                              |                |            |               |
| Male (ref)                                              | -              | -          | -             |
| Female                                                  | .010           | 1.874      | 1.163 – 3.021 |
| <b>Workplace setting</b>                                |                |            |               |
| COVID-19 hospital or referral hospital (ref)            | -              | -          | -             |
| Non-COVID-19 hospital                                   | .001           | 0.356      | 0.189 – 0.669 |
| Primary care or other healthcare facilities             | .029           | 0.574      | 0.348 – 0.946 |
| <b>Workplace support from intimidation</b>              |                |            |               |
| Yes (ref)                                               | -              | -          | -             |
| No                                                      | .017           | 2.099      | 1.143 – 3.854 |
| <b>Willingness to work during the COVID-19 pandemic</b> |                |            |               |
| Yes (ref)                                               | -              | -          | -             |
| No                                                      | .016           | 2.154      | 1.157 – 4.012 |

*p* values < .05 were considered statistically significant. aOR, adjusted odds ratio; COVID-19, coronavirus disease 2019; CI, confidence interval.

**Table 5.** Determinants of stress among healthcare workers (n=392)

| <b>Variables</b>                                                               | <b>p value</b> | <b>aOR</b> | <b>95%CI</b>   |
|--------------------------------------------------------------------------------|----------------|------------|----------------|
| <b>Age</b>                                                                     | .001           | 0.956      | 0.930 – 0.983  |
| <b>Workplace support from intimidation</b>                                     |                |            |                |
| Yes (ref)                                                                      | -              | -          | -              |
| No                                                                             | .014           | 2.043      | 1.154 – 3.616  |
| <b>Willingness to work during COVID-19 pandemic</b>                            |                |            |                |
| Yes (ref)                                                                      | -              | -          | -              |
| No                                                                             | .014           | 2.169      | 1.168 – 4.027  |
| <b>Work during COVID-19 pandemic because of financial matters</b>              |                |            |                |
| Yes                                                                            | .014           | 3.575      | 1.293 – 9.885  |
| No (ref)                                                                       | -              | -          | -              |
| <b>Work during COVID-19 pandemic because already bound to working contract</b> |                |            |                |
| Yes                                                                            | .014           | 4.352      | 1.340 – 14.137 |
| No (ref)                                                                       | -              | -          | -              |

*p* values < .05 were considered statistically significant. aOR, adjusted odds ratio; COVID-19, coronavirus disease 2019; CI, confidence interval.



Figure 1

512x270mm (130 x 130 DPI)

1  
2  
3  
4  
5  
6  
7  
8  
9  
10  
11  
12  
13  
14  
15  
16  
17  
18  
19  
20  
21  
22  
23  
24  
25  
26  
27  
28  
29  
30  
31  
32  
33  
34  
35  
36  
37  
38  
39  
40  
41  
42  
43  
44  
45  
46  
47  
48  
49  
50  
51  
52  
53  
54  
55  
56  
57  
58  
59  
60



Figure 2

78x59mm (330 x 330 DPI)

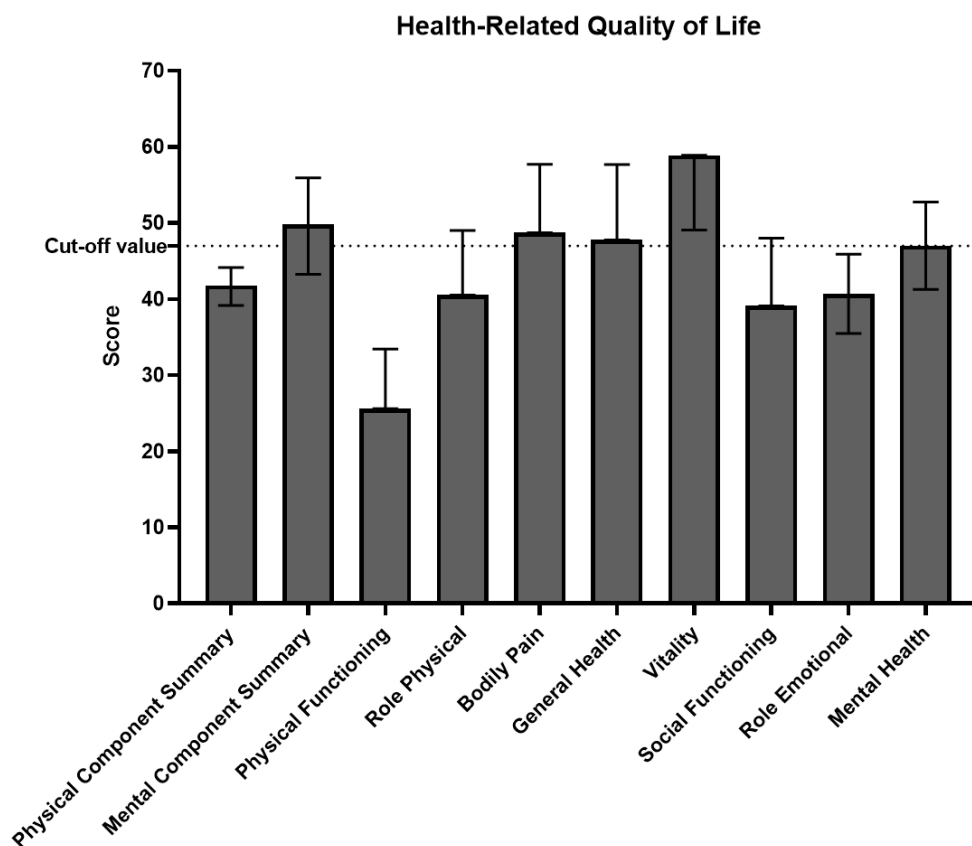

Figure 3

85x74mm (330 x 330 DPI)

1  
2  
3  
4  
5  
6  
7  
8  
9  
10  
11  
12  
13  
14  
15  
16  
17  
18  
19  
20  
21  
22  
23  
24  
25  
26  
27  
28  
29  
30  
31  
32  
33  
34  
35  
36  
37  
38  
39  
40  
41  
42  
43  
44  
45  
46  
47  
48  
49  
50  
51  
52  
53  
54  
55  
56  
57  
58  
59  
60

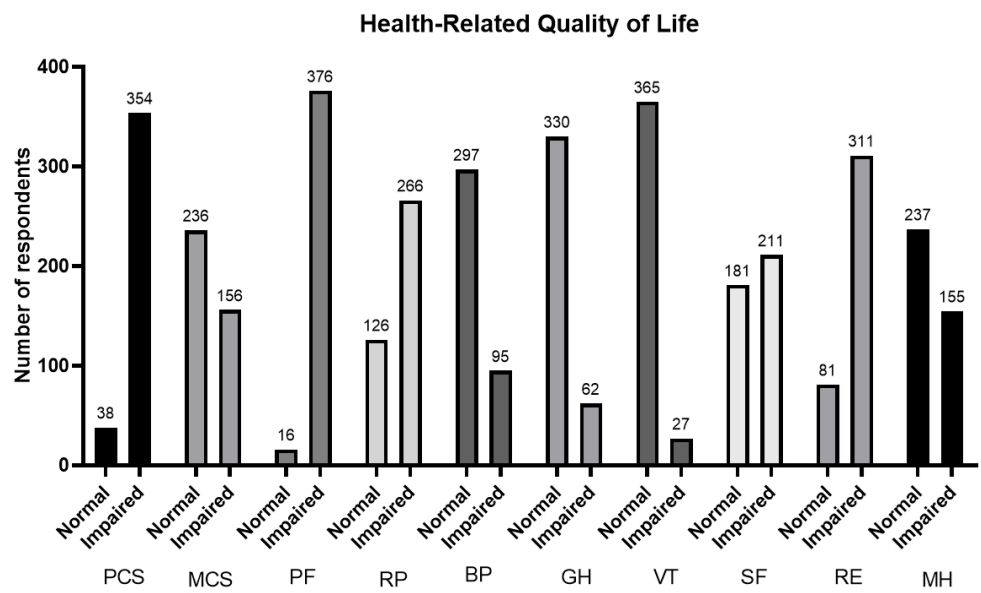

Figure 4

91x56mm (330 x 330 DPI)



**Supplementary figure 1.** Prevalence of depression, anxiety, and stress among male healthcare workers in each severity level according to DASS-21 scores.



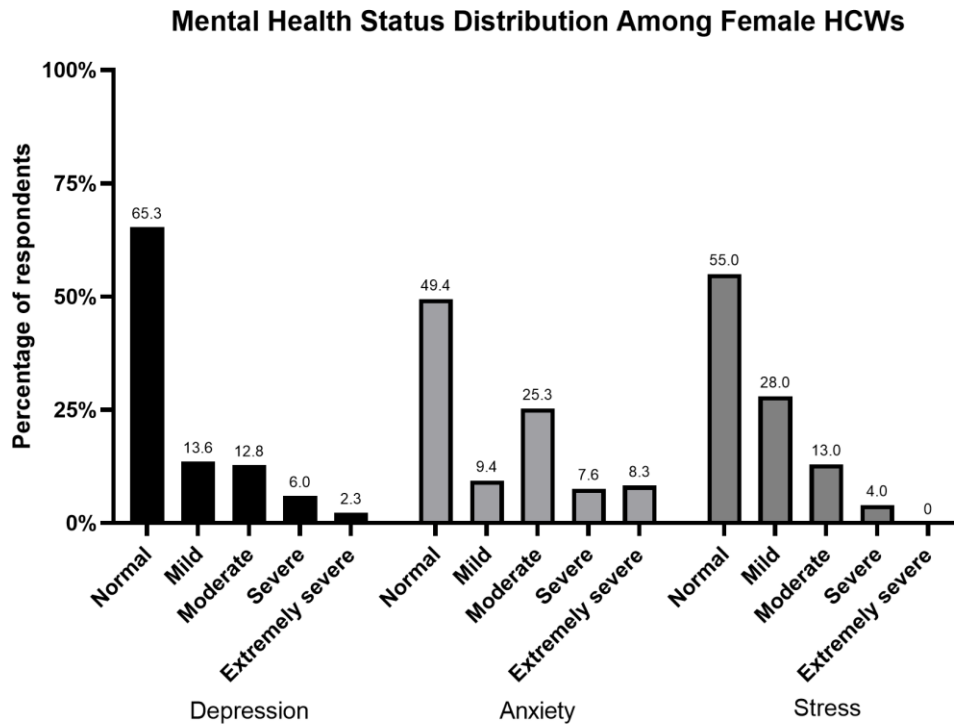

**Supplementary figure 2.** Prevalence of depression, anxiety, and stress among female healthcare workers in each severity level according to DASS-21 scores.

**Supplementary Table 1.** Univariate analysis of determinants for depression among HCWs

| <b>Variables</b>                                                                                                       | <b>p value</b>   | <b>COR</b> | <b>95%CI</b>  |
|------------------------------------------------------------------------------------------------------------------------|------------------|------------|---------------|
| <b>Age</b>                                                                                                             | <b>.018</b>      | 0.941      | 0.913 – 0.969 |
| <b>Sex</b>                                                                                                             |                  |            |               |
| Male (ref)                                                                                                             | -                | -          | -             |
| Female                                                                                                                 | <b>.007</b>      | 1.970      | 1.201 – 3.230 |
| <b>Marital status</b>                                                                                                  |                  |            |               |
| Single (ref)                                                                                                           | -                | -          | -             |
| Married                                                                                                                | <b>.013</b>      | 0.524      | 0.315 – 0.873 |
| Married with children                                                                                                  | <b>&lt; .001</b> | 0.337      | 0.192 – 0.592 |
| <b>Job</b>                                                                                                             |                  |            |               |
| Doctor (ref)                                                                                                           | -                | -          | -             |
| Nurse                                                                                                                  | .262             | 0.676      | 0.340 – 1.341 |
| Midwife                                                                                                                | .133             | 0.380      | 0.107 – 1.345 |
| Dentist                                                                                                                | .872             | 1.073      | 0.457 – 2.520 |
| Pharmacist                                                                                                             | .464             | 0.676      | 0.237 – 1.929 |
| Others (nutritionist, physiotherapist, laboratory analyst, acupuncturist, health educator, and hospital administrator) | .603             | 0.835      | 0.422 – 1.649 |
| <b>Workplace setting</b>                                                                                               |                  |            |               |
| COVID-19 hospital or referral hospital (ref)                                                                           | -                | -          | -             |
| Non-COVID-19 hospital                                                                                                  | .156             | 0.645      | 0.353 – 1.181 |
| Primary care or other healthcare facilities                                                                            | .096             | 0.666      | 0.412 – 1.075 |
| <b>Workplace island</b>                                                                                                |                  |            |               |
| Java Island (ref)                                                                                                      | -                | -          | -             |
| Outside Java Island                                                                                                    | .118             | 0.656      | 0.387 – 1.113 |
| <b>Working period during the COVID-19 pandemic</b>                                                                     |                  |            |               |
| Since the beginning of pandemic (ref)                                                                                  | -                | -          | -             |
| In the middle of pandemic                                                                                              | .268             | 1.338      | 0.799 – 2.238 |
| <b>Working experience before the COVID-19 pandemic</b>                                                                 |                  |            |               |
| Not working (ref)                                                                                                      | -                | -          | -             |
| <1 year                                                                                                                | .666             | 0.833      | 0.364 – 1.906 |
| 1–3 years                                                                                                              | .604             | 1.229      | 0.564 – 2.677 |
| >3 years                                                                                                               | .003             | 0.313      | 0.147 – 0.666 |
| <b>Income during the COVID-19 pandemic</b>                                                                             |                  |            |               |
| <3 million rupiah/month (ref)                                                                                          | -                | -          | -             |
| 3-5 million rupiah/month                                                                                               | .322             | 1.377      | 0.731 – 2.594 |
| 5-10 million rupiah/month                                                                                              | .413             | 1.301      | 0.692 – 2.446 |
| 10-20 million rupiah/month                                                                                             | .918             | 1.042      | 0.478 – 2.271 |
| >20 million rupiah/month                                                                                               | .052             | 0.375      | 0.139 – 1.010 |
| <b>Working hour per week during the COVID-19 pandemic</b>                                                              |                  |            |               |

|                                                                                        |                  |       |               |
|----------------------------------------------------------------------------------------|------------------|-------|---------------|
| <40 hours/week (ref)                                                                   | -                | -     | -             |
| 40–60 hours/week                                                                       | .114             | 1.444 | 0.916 – 2.279 |
| >60 hours/week                                                                         | .064             | 2.104 | 0.957 – 4.627 |
| <b>History of COVID-19 infection</b>                                                   |                  |       |               |
| Yes                                                                                    | .925             | 0.971 | 0.526 – 1.793 |
| No (ref)                                                                               | -                | -     | -             |
| <b>History of COVID-19 infection in the family</b>                                     |                  |       |               |
| Yes                                                                                    | .447             | 1.197 | 0.753 – 1.903 |
| No (ref)                                                                               | -                | -     | -             |
| <b>Any family member died because of COVID-19</b>                                      |                  |       |               |
| Yes                                                                                    | .130             | 1.884 | 0.829 – 4.282 |
| No (ref)                                                                               | -                | -     | -             |
| <b>Having one or more comorbidities</b>                                                |                  |       |               |
| Yes                                                                                    | .363             | 1.241 | 0.780 – 1.975 |
| No (ref)                                                                               | -                | -     | -             |
| <b>PPE availability in the workplace</b>                                               |                  |       |               |
| Not available or not according to standard (ref)                                       | -                | -     | -             |
| Available and according to standard                                                    | <b>.032</b>      | 0.613 | 0.393 – 0.958 |
| <b>Verbal intimidation in the workplace</b>                                            |                  |       |               |
| Never (ref)                                                                            | -                | -     | -             |
| At least once                                                                          | <b>.001</b>      | 2.102 | 1.355 – 3.263 |
| <b>Physical intimidation in the workplace</b>                                          |                  |       |               |
| Never (ref)                                                                            | -                | -     | -             |
| At least once                                                                          | .974             | 1.020 | 0.308 – 3.381 |
| <b>Intimidation from the society outside workplace</b>                                 |                  |       |               |
| Never (ref)                                                                            | -                | -     | -             |
| At least once                                                                          | <b>.005</b>      | 1.956 | 1.226 – 3.119 |
| <b>Workplace support from intimidation</b>                                             |                  |       |               |
| Yes (ref)                                                                              | -                | -     | -             |
| No                                                                                     | <b>.013</b>      | 1.963 | 1.153 – 3.345 |
| <b>Willingness to work during the COVID-19 pandemic</b>                                |                  |       |               |
| Yes                                                                                    | -                | -     | -             |
| No (ref)                                                                               | <b>.003</b>      | 2.343 | 1.346 – 4.080 |
| <b>Reason for HCW to work during the COVID-19 pandemic because feeling responsible</b> |                  |       |               |
| Yes                                                                                    | <b>&lt; .001</b> | 0.364 | 0.228 – 0.581 |
| No (ref)                                                                               | -                | -     | -             |
| <b>Reason to work during the COVID-19 pandemic because of financial matters</b>        |                  |       |               |
| Yes                                                                                    | .099             | 1.521 | 0.924 – 2.504 |

|                                                                                              |             |       |               |
|----------------------------------------------------------------------------------------------|-------------|-------|---------------|
| No (ref)                                                                                     | -           | -     | -             |
| <b>Reason to work during the COVID-19 pandemic because already bound to working contract</b> |             |       |               |
| Yes                                                                                          | <b>.001</b> | 3.245 | 1.616 – 6.515 |
| No (ref)                                                                                     | -           | -     | -             |

For peer review only

**Supplementary Table 2.** Univariate analysis of determinants for anxiety among HCWs

| <b>Variables</b>                                                                                                       | <b>p value</b>   | <b>COR</b> | <b>95%CI</b>  |
|------------------------------------------------------------------------------------------------------------------------|------------------|------------|---------------|
| <b>Age</b>                                                                                                             | <b>&lt; .001</b> | 0.942      | 0.919 – 0.966 |
| <b>Sex</b>                                                                                                             |                  |            |               |
| Male (ref)                                                                                                             | -                | -          | -             |
| Female                                                                                                                 | <b>.001</b>      | 2.070      | 1.332 – 3.218 |
| <b>Marital status</b>                                                                                                  |                  |            |               |
| Single (ref)                                                                                                           | -                | -          | -             |
| Married                                                                                                                | <b>.003</b>      | 0.484      | 0.298 – 0.785 |
| Married with children                                                                                                  | <b>.004</b>      | 0.481      | 0.293 – 0.789 |
| <b>Job</b>                                                                                                             |                  |            |               |
| Doctor (ref)                                                                                                           | -                | -          | -             |
| Nurse                                                                                                                  | .092             | 0.583      | 0.311 – 1.039 |
| Midwife                                                                                                                | .186             | 0.509      | 0.187 – 1.385 |
| Dentist                                                                                                                | .545             | 1.285      | 0.570 – 2.901 |
| Pharmacist                                                                                                             | .516             | 0.735      | 0.289 – 1.865 |
| Others (nutritionist, physiotherapist, laboratory analyst, acupuncturist, health educator, and hospital administrator) | .826             | 0.932      | 0.499 – 1.741 |
| <b>Workplace setting</b>                                                                                               |                  |            |               |
| COVID-19 hospital or referral hospital (ref)                                                                           | -                | -          | -             |
| Non-COVID-19 hospital                                                                                                  | <b>.024</b>      | 0.524      | 0.299 – 0.920 |
| Primary care or other healthcare facilities                                                                            | .140             | 0.716      | 0.460 – 1.116 |
| <b>Workplace island</b>                                                                                                |                  |            |               |
| Java Island (ref)                                                                                                      | -                | -          | -             |
| Outside Java Island                                                                                                    | .464             | 0.840      | 0.527 – 1.339 |
| <b>Working period during the COVID-19 pandemic</b>                                                                     |                  |            |               |
| Since the beginning of pandemic (ref)                                                                                  | -                | -          | -             |
| In the middle of pandemic                                                                                              | .197             | 1.379      | 0.847 – 2.246 |
| <b>Working experience before the COVID-19 pandemic</b>                                                                 |                  |            |               |
| Not working (ref)                                                                                                      | -                | -          | -             |
| <1 year                                                                                                                | .147             | 0.545      | 0.240 – 1.238 |
| 1–3 years                                                                                                              | .792             | 1.111      | 0.507 – 2.433 |
| >3 years                                                                                                               | <b>.012</b>      | 0.394      | 0.191 – 0.812 |
| <b>Income during the COVID-19 pandemic</b>                                                                             |                  |            |               |
| <3 million rupiah/month (ref)                                                                                          | -                | -          | -             |
| 3-5 million rupiah/month                                                                                               | .674             | 1.135      | 0.631 – 2.041 |
| 5-10 million rupiah/month                                                                                              | .851             | 1.058      | 0.590 – 1.895 |
| 10-20 million rupiah/month                                                                                             | .633             | 0.840      | 0.411 – 1.718 |
| >20 million rupiah/month                                                                                               | .246             | 0.640      | 0.301 – 1.361 |
| <b>Working hour per week during the COVID-19 pandemic</b>                                                              |                  |            |               |

|                                                                                        |                  |       |               |
|----------------------------------------------------------------------------------------|------------------|-------|---------------|
| <40 hours/week (ref)                                                                   | -                | -     | -             |
| 40–60 hours/week                                                                       | .263             | 1.268 | 0.836 – 1.923 |
| >60 hours/week                                                                         | .157             | 1.739 | 0.808 – 3.746 |
| <b>History of COVID-19 infection</b>                                                   |                  |       |               |
| Yes                                                                                    | .206             | 1.438 | 0.819 – 2.526 |
| No (ref)                                                                               | -                | -     | -             |
| <b>History of COVID-19 infection in the family</b>                                     |                  |       |               |
| Yes                                                                                    | .996             | 1.001 | 0.649 – 1.545 |
| No (ref)                                                                               | -                | -     | -             |
| <b>Any family member died because of COVID-19</b>                                      |                  |       |               |
| Yes                                                                                    | .462             | 1.356 | 0.602 – 3.051 |
| No (ref)                                                                               | -                | -     | -             |
| <b>Having one or more comorbidities</b>                                                |                  |       |               |
| Yes                                                                                    | .670             | 1.099 | 0.711 – 1.699 |
| No (ref)                                                                               | -                | -     | -             |
| <b>PPE availability in the workplace</b>                                               |                  |       |               |
| Not available or not according to standard (ref)                                       | -                | -     | -             |
| Available and according to standard                                                    | <b>.036</b>      | 0.638 | 0.419 – 0.970 |
| <b>Verbal intimidation in the workplace</b>                                            |                  |       |               |
| Never (ref)                                                                            | -                | -     | -             |
| At least once                                                                          | <b>.002</b>      | 1.940 | 1.283 – 2.933 |
| <b>Physical intimidation in the workplace</b>                                          |                  |       |               |
| Never (ref)                                                                            | -                | -     | -             |
| At least once                                                                          | .926             | 1.054 | 0.348 – 3.195 |
| <b>Intimidation from the society outside workplace</b>                                 |                  |       |               |
| Never (ref)                                                                            | -                | -     | -             |
| At least once                                                                          | <b>.024</b>      | 1.675 | 1.071 – 2.620 |
| <b>Workplace support from intimidation</b>                                             |                  |       |               |
| Yes (ref)                                                                              | -                | -     | -             |
| No                                                                                     | <b>.003</b>      | 2.263 | 1.332 – 3.845 |
| <b>Willingness to work during the COVID-19 pandemic</b>                                |                  |       |               |
| Yes                                                                                    | -                | -     | -             |
| No (ref)                                                                               | <b>&lt; .001</b> | 2.820 | 1.55 – 4.986  |
| <b>Reason for HCW to work during the COVID-19 pandemic because feeling responsible</b> |                  |       |               |
| Yes                                                                                    | <b>.001</b>      | 0.459 | 0.292 – 0.721 |
| No (ref)                                                                               | -                | -     | -             |
| <b>Reason to work during the COVID-19 pandemic because of financial matters</b>        |                  |       |               |
| Yes                                                                                    | <b>.040</b>      | 1.650 | 1.024 – 2.660 |

1  
2  
3  
4  
5  
6  
7  
8  
9  
10  
11  
12  
13  
14  
15  
16  
17  
18  
19  
20  
21  
22  
23  
24  
25  
26  
27  
28  
29  
30  
31  
32  
33  
34  
35  
36  
37  
38  
39  
40  
41  
42  
43  
44  
45  
46  
47  
48  
49  
50  
51  
52  
53  
54  
55  
56  
57  
58  
59  
60

|                                                                                              |      |       |               |
|----------------------------------------------------------------------------------------------|------|-------|---------------|
| No (ref)                                                                                     | -    | -     | -             |
| <b>Reason to work during the COVID-19 pandemic because already bound to working contract</b> |      |       |               |
| Yes                                                                                          | .093 | 1.815 | 1.906 – 3.637 |
| No (ref)                                                                                     | -    | -     | -             |

For peer review only

**Supplementary Table 3.** Univariate analysis of determinants for stress among HCWs

| <b>Variables</b>                                                                                                       | <b>p value</b>   | <b>COR</b> | <b>95%CI</b>  |
|------------------------------------------------------------------------------------------------------------------------|------------------|------------|---------------|
| <b>Age</b>                                                                                                             | <b>&lt; .001</b> | 0.955      | 0.932 – 0.978 |
| <b>Sex</b>                                                                                                             |                  |            |               |
| Male (ref)                                                                                                             | -                | -          | -             |
| Female                                                                                                                 | .076             | 1.485      | 0.960 – 2.299 |
| <b>Marital status</b>                                                                                                  |                  |            |               |
| Single (ref)                                                                                                           | -                | -          | -             |
| Married                                                                                                                | <b>.020</b>      | 0.561      | 0.345 – 0.911 |
| Married with children                                                                                                  | .055             | 0.616      | 0.376 – 1.009 |
| <b>Job</b>                                                                                                             |                  |            |               |
| Doctor (ref)                                                                                                           | -                | -          | -             |
| Nurse                                                                                                                  | .311             | 0.722      | 0.385 – 1.355 |
| Midwife                                                                                                                | .644             | 0.796      | 0.302 – 2.097 |
| Dentist                                                                                                                | .706             | 1.170      | 0.518 – 2.642 |
| Pharmacist                                                                                                             | .506             | 1.365      | 0.546 – 3.408 |
| Others (nutritionist, physiotherapist, laboratory analyst, acupuncturist, health educator, and hospital administrator) | .853             | 1.061      | 0.566 – 1.989 |
| <b>Workplace setting</b>                                                                                               |                  |            |               |
| COVID-19 hospital or referral hospital (ref)                                                                           | -                | -          | -             |
| Non-COVID-19 hospital                                                                                                  | .321             | 0.754      | 0.432 – 1.317 |
| Primary care or other healthcare facilities                                                                            | .407             | 0.828      | 0.530 – 1.294 |
| <b>Workplace island</b>                                                                                                |                  |            |               |
| Java Island (ref)                                                                                                      | -                | -          | -             |
| Outside Java Island                                                                                                    | .607             | 0.884      | 0.553 – 1.414 |
| <b>Working period during the COVID-19 pandemic</b>                                                                     |                  |            |               |
| Since the beginning of pandemic (ref)                                                                                  | -                | -          | -             |
| In the middle of pandemic                                                                                              | .742             | 0.920      | 0.561 – 1.511 |
| <b>Working experience before the COVID-19 pandemic</b>                                                                 |                  |            |               |
| Not working (ref)                                                                                                      | -                | -          | -             |
| <1 year                                                                                                                | .261             | 0.624      | 0.274 – 1.421 |
| 1–3 years                                                                                                              | .403             | 1.390      | 0.642 – 3.011 |
| >3 years                                                                                                               | .228             | 0.644      | 0.315 – 1.317 |
| <b>Income during the COVID-19 pandemic</b>                                                                             |                  |            |               |
| <3 million rupiah/month (ref)                                                                                          | -                | -          | -             |
| 3-5 million rupiah/month                                                                                               | .100             | 1.655      | 0.909 – 3.013 |
| 5-10 million rupiah/month                                                                                              | .236             | 1.434      | 0.790 – 2.604 |
| 10-20 million rupiah/month                                                                                             | .584             | 1.225      | 0.593 – 2.531 |
| >20 million rupiah/month                                                                                               | .357             | 0.89       | 0.312 – 1.522 |
| <b>Working hour per week during the COVID-19 pandemic</b>                                                              |                  |            |               |



|                                                                                        |                  |       |               |
|----------------------------------------------------------------------------------------|------------------|-------|---------------|
| <40 hours/week (ref)                                                                   | -                | -     | -             |
| 40–60 hours/week                                                                       | .359             | 1.217 | 0.800 – 1.852 |
| >60 hours/week                                                                         | .321             | 1.473 | 0.685 – 3.168 |
| <b>History of COVID-19 infection</b>                                                   |                  |       |               |
| Yes                                                                                    | .532             | 1.197 | 0.681 – 2.106 |
| No (ref)                                                                               | -                | -     | -             |
| <b>History of COVID-19 infection in the family</b>                                     |                  |       |               |
| Yes                                                                                    | .935             | 0.982 | 0.634 – 1.521 |
| No (ref)                                                                               | -                | -     | -             |
| <b>Any family member died because of COVID-19</b>                                      |                  |       |               |
| Yes                                                                                    | .143             | 1.841 | 0.814 – 4.167 |
| No (ref)                                                                               | -                | -     | -             |
| <b>Having one or more comorbidities</b>                                                |                  |       |               |
| Yes                                                                                    | .437             | 1.190 | 0.768 – 1.843 |
| No (ref)                                                                               | -                | -     | -             |
| <b>PPE availability in the workplace</b>                                               |                  |       |               |
| Not available or not according to standard (ref)                                       | -                | -     | -             |
| Available and according to standard                                                    | <b>.019</b>      | 0.602 | 0.395 – 0.919 |
| <b>Verbal intimidation in the workplace</b>                                            |                  |       |               |
| Never (ref)                                                                            | -                | -     | -             |
| At least once                                                                          | <b>.025</b>      | 1.604 | 1.061 – 2.425 |
| <b>Physical intimidation in the workplace</b>                                          |                  |       |               |
| Never (ref)                                                                            | -                | -     | -             |
| At least once                                                                          | .377             | 1.650 | 0.544 – 5.003 |
| <b>Intimidation from the society outside workplace</b>                                 |                  |       |               |
| Never (ref)                                                                            | -                | -     | -             |
| At least once                                                                          | <b>.019</b>      | 1.708 | 1.091 – 2.673 |
| <b>Workplace support from intimidation</b>                                             |                  |       |               |
| Yes (ref)                                                                              | -                | -     | -             |
| No                                                                                     | <b>.005</b>      | 2.129 | 1.261 – 3.595 |
| <b>Willingness to work during the COVID-19 pandemic</b>                                |                  |       |               |
| Yes                                                                                    | -                | -     | -             |
| No (ref)                                                                               | <b>&lt; .001</b> | 2.781 | 1.586 – 4.874 |
| <b>Reason for HCW to work during the COVID-19 pandemic because feeling responsible</b> |                  |       |               |
| Yes                                                                                    | <b>&lt; .001</b> | 0.427 | 0.271 – 0.671 |
| No (ref)                                                                               | -                | -     | -             |
| <b>Reason to work during the COVID-19 pandemic because of financial matters</b>        |                  |       |               |
| Yes                                                                                    | <b>.001</b>      | 2.193 | 1.355 – 3.549 |

|                                                                                              |             |       |               |
|----------------------------------------------------------------------------------------------|-------------|-------|---------------|
| No (ref)                                                                                     | -           | -     | -             |
| <b>Reason to work during the COVID-19 pandemic because already bound to working contract</b> |             |       |               |
| Yes                                                                                          | <b>.006</b> | 2.698 | 1.323 – 5.501 |
| No (ref)                                                                                     | -           | -     | -             |

For peer review only

**Supplementary Table 4.** Univariate analysis of determinants for impaired physical health component among HCWs

| <b>Variables</b>                                                                                                       | <b>p value</b> | <b>COR</b> | <b>95%CI</b>   |
|------------------------------------------------------------------------------------------------------------------------|----------------|------------|----------------|
| <b>Age</b>                                                                                                             | .134           | 1.033      | 0.990 – 1.079  |
| <b>Sex</b>                                                                                                             |                |            |                |
| Male (ref)                                                                                                             | -              | -          | -              |
| Female                                                                                                                 | .633           | 0.836      | 0.401 – 1.744  |
| <b>Marital status</b>                                                                                                  |                |            |                |
| Single (ref)                                                                                                           | -              | -          | -              |
| Married                                                                                                                | .318           | 1.496      | 0.878 – 3.299  |
| Married with children                                                                                                  | .214           | 1.703      | 0.735 – 3.945  |
| <b>Job</b>                                                                                                             |                |            |                |
| Doctor (ref)                                                                                                           | -              | -          | -              |
| Nurse                                                                                                                  | .310           | 0.621      | 0.248 – 1.557  |
| Midwife                                                                                                                | .802           | 0.821      | 0.177 – 3.813  |
| Dentist                                                                                                                | .285           | 0.531      | 0.167 – 1.695  |
| Pharmacist                                                                                                             | .564           | 1.836      | 0.233 – 14.441 |
| Others (nutritionist, physiotherapist, laboratory analyst, acupuncturist, health educator, and hospital administrator) | .915           | 1.063      | 0.346 – 3.263  |
| <b>Workplace setting</b>                                                                                               |                |            |                |
| COVID-19 hospital or referral hospital (ref)                                                                           | -              | -          | -              |
| Non-COVID-19 hospital                                                                                                  | .298           | 0.633      | 0.267 – 1.499  |
| Primary care or other healthcare facilities                                                                            | .944           | 0.973      | 0.448 – 2.113  |
| <b>Workplace island</b>                                                                                                |                |            |                |
| Java Island (ref)                                                                                                      | -              | -          | -              |
| Outside Java Island                                                                                                    | .095           | 2.284      | 0.865 – 6.026  |
| <b>Working period during the COVID-19 pandemic</b>                                                                     |                |            |                |
| Since the beginning of pandemic (ref)                                                                                  | -              | -          | -              |
| In the middle of pandemic                                                                                              | .659           | 0.837      | 0.380 – 1.846  |
| <b>Working experience before the COVID-19 pandemic</b>                                                                 |                |            |                |
| Not working (ref)                                                                                                      | -              | -          | -              |
| <1 year                                                                                                                | .090           | 0.163      | 0.020 – 1.328  |
| 1–3 years                                                                                                              | .143           | 0.210      | 0.026 – 1.693  |
| >3 years                                                                                                               | .281           | 0.323      | 0.042 – 2.517  |
| <b>Income during the COVID-19 pandemic</b>                                                                             |                |            |                |
| <3 million rupiah/month (ref)                                                                                          | -              | -          | -              |
| 3-5 million rupiah/month                                                                                               | .555           | 1.423      | 0.441 – 4.591  |
| 5-10 million rupiah/month                                                                                              | .052           | 0.385      | 0.147 – 1.008  |
| 10-20 million rupiah/month                                                                                             | .680           | 1.352      | 0.322 – 5.670  |
| >20 million rupiah/month                                                                                               | .794           | 1.211      | 0.288 – 5.096  |
| <b>Working hour per week during the</b>                                                                                |                |            |                |

|                                                                                        |      |       |                |
|----------------------------------------------------------------------------------------|------|-------|----------------|
| <b>COVID-19 pandemic</b>                                                               |      |       |                |
| <40 hours/week (ref)                                                                   | -    | -     | -              |
| 40–60 hours/week                                                                       | .706 | 1.146 | 0.565 – 2.325  |
| >60 hours/week                                                                         | .626 | 0.750 | 0.236 – 2.386  |
| <b>History of COVID-19 infection</b>                                                   |      |       |                |
| Yes                                                                                    | .818 | 0.898 | 0.357 – 2.255  |
| No (ref)                                                                               | -    | -     | -              |
| <b>History of COVID-19 infection in the family</b>                                     |      |       |                |
| Yes                                                                                    | .342 | 0.713 | 0.35 – 1.433   |
| No (ref)                                                                               | -    | -     | -              |
| <b>Any family member died because of COVID-19</b>                                      |      |       |                |
| Yes                                                                                    | .278 | 0.536 | 0.174 – 1.653  |
| No (ref)                                                                               | -    | -     | -              |
| <b>Having one or more comorbidities</b>                                                |      |       |                |
| Yes                                                                                    | .778 | 0.901 | 0.438 – 1.854  |
| No (ref)                                                                               | -    | -     | -              |
| <b>PPE availability in the workplace</b>                                               |      |       |                |
| Not available or not according to standard (ref)                                       | -    | -     | -              |
| Available and according to standard                                                    | .285 | 0.662 | 0.312 – 1.408  |
| <b>Verbal intimidation in the workplace</b>                                            |      |       |                |
| Never (ref)                                                                            | -    | -     | -              |
| At least once                                                                          | .876 | 1.057 | 0.528 – 2.113  |
| <b>Physical intimidation in the workplace</b>                                          |      |       |                |
| Never (ref)                                                                            | -    | -     | -              |
| At least once                                                                          | .805 | 1.298 | 0.164 – 10.268 |
| <b>Intimidation from the society outside workplace</b>                                 |      |       |                |
| Never (ref)                                                                            | -    | -     | -              |
| At least once                                                                          | .366 | 1.456 | 0.645 – 3.285  |
| <b>Workplace support from intimidation</b>                                             |      |       |                |
| Yes (ref)                                                                              | -    | -     | -              |
| No                                                                                     | .589 | 0.796 | 0.348 – 1.820  |
| <b>Willingness to work during the COVID-19 pandemic</b>                                |      |       |                |
| Yes                                                                                    | -    | -     | -              |
| No (ref)                                                                               | .996 | 1.002 | 0.400 – 2.509  |
| <b>Reason for HCW to work during the COVID-19 pandemic because feeling responsible</b> |      |       |                |
| Yes                                                                                    | .080 | 1.857 | 0.929 – 3.712  |
| No (ref)                                                                               | -    | -     | -              |
| <b>Reason to work during the COVID-19 pandemic because of financial matters</b>        |      |       |                |

|                                                                                              |      |       |               |
|----------------------------------------------------------------------------------------------|------|-------|---------------|
| Yes                                                                                          | .071 | 0.517 | 0.252 – 1.059 |
| No (ref)                                                                                     | -    | -     | -             |
| <b>Reason to work during the COVID-19 pandemic because already bound to working contract</b> |      |       |               |
| Yes                                                                                          | .722 | 1.199 | 0.350 – 4.113 |
| No (ref)                                                                                     | -    | -     | -             |

For peer review only

**Supplementary Table 5.** Univariate analysis of determinants for impaired mental health component among HCWs

| <b>Variables</b>                                                                                                       | <b>p value</b> | <b>COR</b> | <b>95%CI</b>  |
|------------------------------------------------------------------------------------------------------------------------|----------------|------------|---------------|
| <b>Age</b>                                                                                                             | .973           | 1.000      | 0.978 – 1.021 |
| <b>Sex</b>                                                                                                             |                |            |               |
| Male (ref)                                                                                                             | -              | -          | -             |
| Female                                                                                                                 | .748           | 0.932      | 0.605 – 1.434 |
| <b>Marital status</b>                                                                                                  |                |            |               |
| Single (ref)                                                                                                           | -              | -          | -             |
| Married                                                                                                                | .266           | 1.319      | 0.810 – 2.148 |
| Married with children                                                                                                  | .263           | 1.329      | 0.808 – 2.187 |
| <b>Job</b>                                                                                                             |                |            |               |
| Doctor (ref)                                                                                                           | -              | -          | -             |
| Nurse                                                                                                                  | .057           | 1.804      | 0.983 – 3.310 |
| Midwife                                                                                                                | .958           | 0.975      | 0.369 – 2.571 |
| Dentist                                                                                                                | .777           | 0.884      | 0.377 – 2.072 |
| Pharmacist                                                                                                             | .273           | 1.671      | 0.668 – 4.179 |
| Others (nutritionist, physiotherapist, laboratory analyst, acupuncturist, health educator, and hospital administrator) | .994           | 1.002      | 0.527 – 1.907 |
| <b>Workplace setting</b>                                                                                               |                |            |               |
| COVID-19 hospital or referral hospital (ref)                                                                           | -              | -          | -             |
| Non-COVID-19 hospital                                                                                                  | .752           | 1.093      | 0.629 – 1.898 |
| Primary care or other healthcare facilities                                                                            | .391           | 0.820      | 0.521 – 1.290 |
| <b>Workplace island</b>                                                                                                |                |            |               |
| Java Island (ref)                                                                                                      | -              | -          | -             |
| Outside Java Island                                                                                                    | .961           | 0.988      | 0.617 – 1.582 |
| <b>Working period during the COVID-19 pandemic</b>                                                                     |                |            |               |
| Since the beginning of pandemic (ref)                                                                                  | -              | -          | -             |
| In the middle of pandemic                                                                                              | .729           | 1.092      | 0.665 – 1.790 |
| <b>Working experience before the COVID-19 pandemic</b>                                                                 |                |            |               |
| Not working (ref)                                                                                                      | -              | -          | -             |
| <1 year                                                                                                                | .252           | 1.619      | 0.710 – 3.689 |
| 1–3 years                                                                                                              | .502           | 0.760      | 0.342 – 1.691 |
| >3 years                                                                                                               | .937           | 1.030      | 0.497 – 2.134 |
| <b>Income during the COVID-19 pandemic</b>                                                                             |                |            |               |
| <3 million rupiah/month (ref)                                                                                          | -              | -          | -             |
| 3-5 million rupiah/month                                                                                               | .187           | 1.510      | 0.818 – 2.785 |
| 5-10 million rupiah/month                                                                                              | .050           | 1.833      | 1.001 – 3.358 |
| 10-20 million rupiah/month                                                                                             | .919           | 1.040      | 0.490 – 2.208 |
| >20 million rupiah/month                                                                                               | .612           | 1.219      | 0.567 – 2.622 |
| <b>Working hour per week during the</b>                                                                                |                |            |               |

|                                                                                        |      |       |               |
|----------------------------------------------------------------------------------------|------|-------|---------------|
| <b>COVID-19 pandemic</b>                                                               |      |       |               |
| <40 hours/week (ref)                                                                   | -    | -     | -             |
| 40–60 hours/week                                                                       | .177 | 1.338 | 0.877 – 2.040 |
| >60 hours/week                                                                         | .899 | 0.950 | 0.429 – 2.105 |
| <b>History of COVID-19 infection</b>                                                   |      |       |               |
| Yes                                                                                    | .841 | 0.943 | 0.430 – 1.678 |
| No (ref)                                                                               | -    | -     | -             |
| <b>History of COVID-19 infection in the family</b>                                     |      |       |               |
| Yes                                                                                    | .829 | 0.953 | 0.612 – 1.482 |
| No (ref)                                                                               | -    | -     | -             |
| <b>Any family member died because of COVID-19</b>                                      |      |       |               |
| Yes                                                                                    | .388 | 1.429 | 0.635 – 3.220 |
| No (ref)                                                                               | -    | -     | -             |
| <b>Having one or more comorbidities</b>                                                |      |       |               |
| Yes                                                                                    | .475 | 0.850 | 0.544 – 1.328 |
| No (ref)                                                                               | -    | -     | -             |
| <b>PPE availability in the workplace</b>                                               |      |       |               |
| Not available or not according to standard (ref)                                       | -    | -     | -             |
| Available and according to standard                                                    | .424 | 0.841 | 0.550 – 1.286 |
| <b>Verbal intimidation in the workplace</b>                                            |      |       |               |
| Never (ref)                                                                            | -    | -     | -             |
| At least once                                                                          | .626 | 0.901 | 0.593 – 1.369 |
| <b>Physical intimidation in the workplace</b>                                          |      |       |               |
| Never (ref)                                                                            | -    | -     | -             |
| At least once                                                                          | .920 | 0.944 | 0.303 – 2.939 |
| <b>Intimidation from the society outside workplace</b>                                 |      |       |               |
| Never (ref)                                                                            | -    | -     | -             |
| At least once                                                                          | .893 | 0.969 | 0.615 – 1.527 |
| <b>Workplace support from intimidation</b>                                             |      |       |               |
| Yes (ref)                                                                              | -    | -     | -             |
| No                                                                                     | .099 | 1.548 | 0.920 – 2.604 |
| <b>Willingness to work during the COVID-19 pandemic</b>                                |      |       |               |
| Yes                                                                                    | -    | -     | -             |
| No (ref)                                                                               | .300 | 0.740 | 0.418 – 1.308 |
| <b>Reason for HCW to work during the COVID-19 pandemic because feeling responsible</b> |      |       |               |
| Yes                                                                                    | .307 | 0.791 | 0.504 – 1.240 |
| No (ref)                                                                               | -    | -     | -             |
| <b>Reason to work during the COVID-19 pandemic because of financial matters</b>        |      |       |               |

|                                                                                              |      |       |               |
|----------------------------------------------------------------------------------------------|------|-------|---------------|
| Yes                                                                                          | .140 | 1.434 | 0.888 – 2.314 |
| No (ref)                                                                                     | -    | -     | -             |
| <b>Reason to work during the COVID-19 pandemic because already bound to working contract</b> |      |       |               |
| Yes                                                                                          | .238 | 0.640 | 0.305 – 1.342 |
| No (ref)                                                                                     | -    | -     | -             |

For peer review only



## STROBE Statement—checklist of items that should be included in reports of observational studies

|                           | Item No | Recommendation                                                                                                                                                                                                                                                                                                                                                                                                                                                         | Page No                     |
|---------------------------|---------|------------------------------------------------------------------------------------------------------------------------------------------------------------------------------------------------------------------------------------------------------------------------------------------------------------------------------------------------------------------------------------------------------------------------------------------------------------------------|-----------------------------|
| <b>Title and abstract</b> | 1       | (a) Indicate the study's design with a commonly used term in the title or the abstract                                                                                                                                                                                                                                                                                                                                                                                 | 1 (line 2-3)<br>3 (line 59) |
|                           |         | (b) Provide in the abstract an informative and balanced summary of what was done and what was found                                                                                                                                                                                                                                                                                                                                                                    | 3 (line 72-75)              |
| <b>Introduction</b>       |         |                                                                                                                                                                                                                                                                                                                                                                                                                                                                        |                             |
| Background/rationale      | 2       | Explain the scientific background and rationale for the investigation being reported                                                                                                                                                                                                                                                                                                                                                                                   | 5-6 (line 90-127)           |
| Objectives                | 3       | State specific objectives, including any prespecified hypotheses                                                                                                                                                                                                                                                                                                                                                                                                       | 6 (line 127-129)            |
| <b>Methods</b>            |         |                                                                                                                                                                                                                                                                                                                                                                                                                                                                        |                             |
| Study design              | 4       | Present key elements of study design early in the paper                                                                                                                                                                                                                                                                                                                                                                                                                | 7 (line 132)                |
| Setting                   | 5       | Describe the setting, locations, and relevant dates, including periods of recruitment, exposure, follow-up, and data collection                                                                                                                                                                                                                                                                                                                                        | 7 (132-148)                 |
| Participants              | 6       | (a) <i>Cohort study</i> —Give the eligibility criteria, and the sources and methods of selection of participants. Describe methods of follow-up<br><i>Case-control study</i> —Give the eligibility criteria, and the sources and methods of case ascertainment and control selection. Give the rationale for the choice of cases and controls<br><i>Cross-sectional study</i> —Give the eligibility criteria, and the sources and methods of selection of participants | 7 (141-146)                 |
|                           |         | (b) <i>Cohort study</i> —For matched studies, give matching criteria and number of exposed and unexposed<br><i>Case-control study</i> —For matched studies, give matching criteria and the number of controls per case                                                                                                                                                                                                                                                 | N/A                         |
| Variables                 | 7       | Clearly define all outcomes, exposures, predictors, potential confounders, and effect modifiers. Give diagnostic criteria, if applicable                                                                                                                                                                                                                                                                                                                               | 8-9 (line 161-198)          |
| Data sources/measurement  | 8*      | For each variable of interest, give sources of data and details of methods of assessment (measurement). Describe comparability of assessment methods if there is more than one group                                                                                                                                                                                                                                                                                   | 8-9 (line 161-204)          |
| Bias                      | 9       | Describe any efforts to address potential sources of bias                                                                                                                                                                                                                                                                                                                                                                                                              | 7 (line 133-136)            |
| Study size                | 10      | Explain how the study size was arrived at                                                                                                                                                                                                                                                                                                                                                                                                                              | 7 (line 148-153)            |
| Quantitative variables    | 11      | Explain how quantitative variables were handled in the analyses. If applicable, describe which groupings were chosen and why                                                                                                                                                                                                                                                                                                                                           | 10 (line 210-212)           |
| Statistical methods       | 12      | (a) Describe all statistical methods, including those used to control for confounding                                                                                                                                                                                                                                                                                                                                                                                  | 10 (line 210-219)           |
|                           |         | (b) Describe any methods used to examine subgroups and interactions                                                                                                                                                                                                                                                                                                                                                                                                    | 10 (line 213-219)           |
|                           |         | (c) Explain how missing data were addressed                                                                                                                                                                                                                                                                                                                                                                                                                            | 10 (line 207)               |

1  
2  
3  
4  
5  
6  
7  
8  
9  
10  
11  
12  
13  
14  
15  
16  
17  
18  
19  
20  
21  
22  
23  
24  
25  
26  
27  
28  
29  
30  
31  
32  
33  
34  
35  
36  
37  
38  
39  
40  
41  
42  
43  
44  
45  
46  
47  
48  
49  
50  
51  
52  
53  
54  
55  
56  
57  
58  
59  
60

(d) *Cohort study*—If applicable, explain how loss to follow-up was addressed

N/A

*Case-control study*—If applicable, explain how matching of cases and controls was addressed

*Cross-sectional study*—If applicable, describe analytical methods taking account of sampling strategy

(e) Describe any sensitivity analyses

N/A

Continued on next page

For peer review only

1  
2  
3  
4  
5  
6  
7  
8  
9  
10  
11  
12  
13  
14  
15  
16  
17  
18  
19  
20  
21  
22  
23  
24  
25  
26  
27  
28  
29  
30  
31  
32  
33  
34  
35  
36  
37  
38  
39  
40  
41  
42  
43  
44  
45  
46  
47  
48  
49  
50  
51  
52  
53  
54  
55  
56  
57  
58  
59  
60

| <b>Results</b>           |     |                                                                                                                                                                                                              |                                                  |
|--------------------------|-----|--------------------------------------------------------------------------------------------------------------------------------------------------------------------------------------------------------------|--------------------------------------------------|
| Participants             | 13* | (a) Report numbers of individuals at each stage of study—eg numbers potentially eligible, examined for eligibility, confirmed eligible, included in the study, completing follow-up, and analysed            | 11 (line 227-228)                                |
|                          |     | (b) Give reasons for non-participation at each stage                                                                                                                                                         | Figure 1                                         |
|                          |     | (c) Consider use of a flow diagram                                                                                                                                                                           | Figure 1                                         |
| Descriptive data         | 14* | (a) Give characteristics of study participants (eg demographic, clinical, social) and information on exposures and potential confounders                                                                     | Table 2                                          |
|                          |     | (b) Indicate number of participants with missing data for each variable of interest                                                                                                                          | Table 2                                          |
|                          |     | (c) <i>Cohort study</i> —Summarise follow-up time (eg, average and total amount)                                                                                                                             | N/A                                              |
| Outcome data             | 15* | <i>Cohort study</i> —Report numbers of outcome events or summary measures over time                                                                                                                          | N/A                                              |
|                          |     | <i>Case-control study</i> —Report numbers in each exposure category, or summary measures of exposure                                                                                                         | N/A                                              |
|                          |     | <i>Cross-sectional study</i> —Report numbers of outcome events or summary measures                                                                                                                           | 11 (line 233-234); 12 (line 272-273)             |
| Main results             | 16  | (a) Give unadjusted estimates and, if applicable, confounder-adjusted estimates and their precision (eg, 95% confidence interval). Make clear which confounders were adjusted for and why they were included | Tables 3, 4, and 5; supplementary tables 1, 2, 3 |
|                          |     | (b) Report category boundaries when continuous variables were categorized                                                                                                                                    | Table 1; 9 (line 203-204); 10 (line 221-222)     |
|                          |     | (c) If relevant, consider translating estimates of relative risk into absolute risk for a meaningful time period                                                                                             | N/A                                              |
| Other analyses           | 17  | Report other analyses done—eg analyses of subgroups and interactions, and sensitivity analyses                                                                                                               | 11 (line 235-239)                                |
| <b>Discussion</b>        |     |                                                                                                                                                                                                              |                                                  |
| Key results              | 18  | Summarise key results with reference to study objectives                                                                                                                                                     | 14 (line 281-285)                                |
| Limitations              | 19  | Discuss limitations of the study, taking into account sources of potential bias or imprecision. Discuss both direction and magnitude of any potential bias                                                   | 18 (line 385-402)                                |
| Interpretation           | 20  | Give a cautious overall interpretation of results considering objectives, limitations, multiplicity of analyses, results from similar studies, and other relevant evidence                                   | 14-18 (line 288-402)                             |
| Generalisability         | 21  | Discuss the generalisability (external validity) of the study results                                                                                                                                        | 18 (line 387-394)                                |
| <b>Other information</b> |     |                                                                                                                                                                                                              |                                                  |
| Funding                  | 22  | Give the source of funding and the role of the funders for the present study and, if applicable, for the original study on which the present article is based                                                | 20 (line 427-428)                                |

1  
2 \*Give information separately for cases and controls in case-control studies and, if applicable, for exposed and  
3 unexposed groups in cohort and cross-sectional studies.  
4

5  
6 **Note:** An Explanation and Elaboration article discusses each checklist item and gives methodological background and  
7 published examples of transparent reporting. The STROBE checklist is best used in conjunction with this article (freely  
8 available on the Web sites of PLoS Medicine at <http://www.plosmedicine.org/>, Annals of Internal Medicine at  
9 <http://www.annals.org/>, and Epidemiology at <http://www.epidem.com/>). Information on the STROBE Initiative is  
10 available at [www.strobe-statement.org](http://www.strobe-statement.org).  
11  
12  
13  
14  
15  
16  
17  
18  
19  
20  
21  
22  
23  
24  
25  
26  
27  
28  
29  
30  
31  
32  
33  
34  
35  
36  
37  
38  
39  
40  
41  
42  
43  
44  
45  
46  
47  
48  
49  
50  
51  
52  
53  
54  
55  
56  
57  
58  
59  
60
