# Supplementary material for: Mental health and health-related quality of life among healthcare workers in Indonesia during the COVID-19 pandemic: a cross-sectional study
Source: PubMed Central journal article supplement — BMJ Open. 2022 Apr 8;12(4):e057963. doi: 10.1136/bmjopen-2021-057963 (PMC8996007; doi:10.1136/bmjopen-2021-057963), 2022-04-08
Supplement: bmjopen-2021-057963supp001.pdf [file bmjopen-2021-057963supp001.pdf]

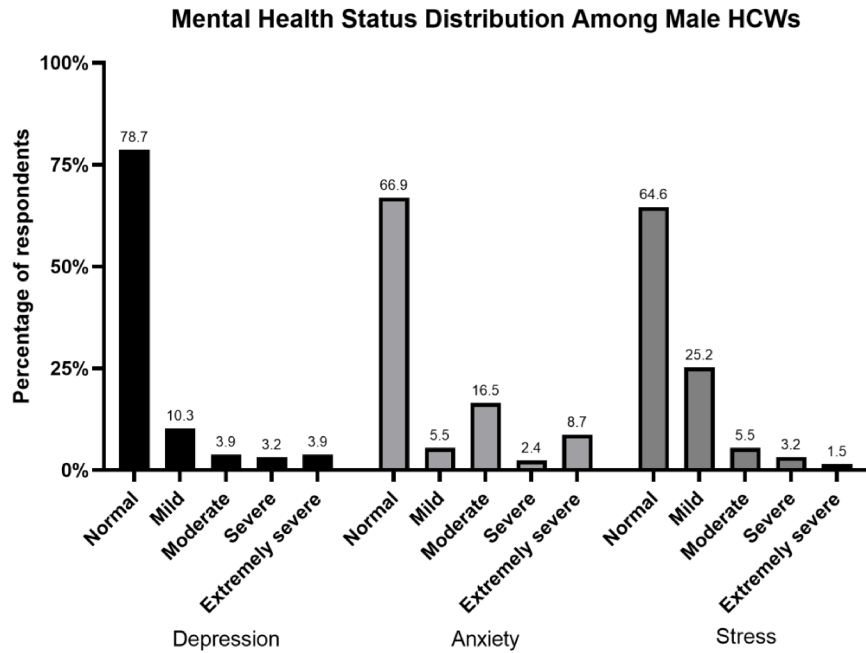

**Supplementary figure 1.** Prevalence of depression, anxiety, and stress among male healthcare workers in each severity level according to DASS-21 scores.

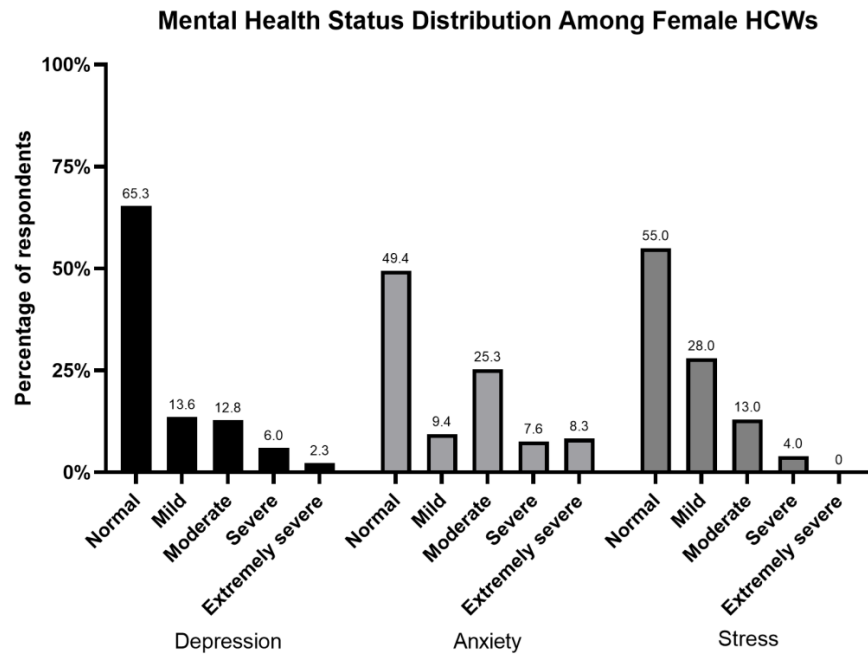

**Supplementary figure 2.** Prevalence of depression, anxiety, and stress among female healthcare workers in each severity level according to DASS-21 scores.

**Supplementary Table 1.** Univariate analysis of determinants for depression among HCWs

| <b>Variables</b>                                                                                                       | <b>p value</b>   | <b>COR</b> | <b>95% CI</b> |
|------------------------------------------------------------------------------------------------------------------------|------------------|------------|---------------|
| <b>Age</b>                                                                                                             | <b>.018</b>      | 0.941      | 0.913 – 0.969 |
| <b>Sex</b>                                                                                                             |                  |            |               |
| Male (ref)                                                                                                             | -                | -          | -             |
| Female                                                                                                                 | <b>.007</b>      | 1.970      | 1.201 – 3.230 |
| <b>Marital status</b>                                                                                                  |                  |            |               |
| Single (ref)                                                                                                           | -                | -          | -             |
| Married                                                                                                                | <b>.013</b>      | 0.524      | 0.315 – 0.873 |
| Married with children                                                                                                  | <b>&lt; .001</b> | 0.337      | 0.192 – 0.592 |
| <b>Job</b>                                                                                                             |                  |            |               |
| Doctor (ref)                                                                                                           | -                | -          | -             |
| Nurse                                                                                                                  | .262             | 0.676      | 0.340 – 1.341 |
| Midwife                                                                                                                | .133             | 0.380      | 0.107 – 1.345 |
| Dentist                                                                                                                | .872             | 1.073      | 0.457 – 2.520 |
| Pharmacist                                                                                                             | .464             | 0.676      | 0.237 – 1.929 |
| Others (nutritionist, physiotherapist, laboratory analyst, acupuncturist, health educator, and hospital administrator) | .603             | 0.835      | 0.422 – 1.649 |
| <b>Workplace setting</b>                                                                                               |                  |            |               |
| COVID-19 hospital or referral hospital (ref)                                                                           | -                | -          | -             |
| Non-COVID-19 hospital                                                                                                  | .156             | 0.645      | 0.353 – 1.181 |
| Primary care or other healthcare facilities                                                                            | .096             | 0.666      | 0.412 – 1.075 |
| <b>Workplace island</b>                                                                                                |                  |            |               |
| Java Island (ref)                                                                                                      | -                | -          | -             |
| Outside Java Island                                                                                                    | .118             | 0.656      | 0.387 – 1.113 |
| <b>Working period during the COVID-19 pandemic</b>                                                                     |                  |            |               |
| Since the beginning of pandemic (ref)                                                                                  | -                | -          | -             |
| In the middle of pandemic                                                                                              | .268             | 1.338      | 0.799 – 2.238 |
| <b>Working experience before the COVID-19 pandemic</b>                                                                 |                  |            |               |
| Not working (ref)                                                                                                      | -                | -          | -             |
| <1 year                                                                                                                | .666             | 0.833      | 0.364 – 1.906 |
| 1–3 years                                                                                                              | .604             | 1.229      | 0.564 – 2.677 |
| >3 years                                                                                                               | .003             | 0.313      | 0.147 – 0.666 |
| <b>Income during the COVID-19 pandemic</b>                                                                             |                  |            |               |
| <3 million rupiah/month (ref)                                                                                          | -                | -          | -             |
| 3-5 million rupiah/month                                                                                               | .322             | 1.377      | 0.731 – 2.594 |
| 5-10 million rupiah/month                                                                                              | .413             | 1.301      | 0.692 – 2.446 |
| 10-20 million rupiah/month                                                                                             | .918             | 1.042      | 0.478 – 2.271 |
| >20 million rupiah/month                                                                                               | .052             | 0.375      | 0.139 – 1.010 |
| <b>Working hour per week during the COVID-19 pandemic</b>                                                              |                  |            |               |

|                                                                                        |                  |       |               |
|----------------------------------------------------------------------------------------|------------------|-------|---------------|
| <40 hours/week (ref)                                                                   | -                | -     | -             |
| 40–60 hours/week                                                                       | .114             | 1.444 | 0.916 – 2.279 |
| >60 hours/week                                                                         | .064             | 2.104 | 0.957 – 4.627 |
| <b>History of COVID-19 infection</b>                                                   |                  |       |               |
| Yes                                                                                    | .925             | 0.971 | 0.526 – 1.793 |
| No (ref)                                                                               | -                | -     | -             |
| <b>History of COVID-19 infection in the family</b>                                     |                  |       |               |
| Yes                                                                                    | .447             | 1.197 | 0.753 – 1.903 |
| No (ref)                                                                               | -                | -     | -             |
| <b>Any family member died because of COVID-19</b>                                      |                  |       |               |
| Yes                                                                                    | .130             | 1.884 | 0.829 – 4.282 |
| No (ref)                                                                               | -                | -     | -             |
| <b>Having one or more comorbidities</b>                                                |                  |       |               |
| Yes                                                                                    | .363             | 1.241 | 0.780 – 1.975 |
| No (ref)                                                                               | -                | -     | -             |
| <b>PPE availability in the workplace</b>                                               |                  |       |               |
| Not available or not according to standard (ref)                                       | -                | -     | -             |
| Available and according to standard                                                    | <b>.032</b>      | 0.613 | 0.393 – 0.958 |
| <b>Verbal intimidation in the workplace</b>                                            |                  |       |               |
| Never (ref)                                                                            | -                | -     | -             |
| At least once                                                                          | <b>.001</b>      | 2.102 | 1.355 – 3.263 |
| <b>Physical intimidation in the workplace</b>                                          |                  |       |               |
| Never (ref)                                                                            | -                | -     | -             |
| At least once                                                                          | .974             | 1.020 | 0.308 – 3.381 |
| <b>Intimidation from the society outside workplace</b>                                 |                  |       |               |
| Never (ref)                                                                            | -                | -     | -             |
| At least once                                                                          | <b>.005</b>      | 1.956 | 1.226 – 3.119 |
| <b>Workplace support from intimidation</b>                                             |                  |       |               |
| Yes (ref)                                                                              | -                | -     | -             |
| No                                                                                     | <b>.013</b>      | 1.963 | 1.153 – 3.345 |
| <b>Willingness to work during the COVID-19 pandemic</b>                                |                  |       |               |
| Yes                                                                                    | -                | -     | -             |
| No (ref)                                                                               | <b>.003</b>      | 2.343 | 1.346 – 4.080 |
| <b>Reason for HCW to work during the COVID-19 pandemic because feeling responsible</b> |                  |       |               |
| Yes                                                                                    | <b>&lt; .001</b> | 0.364 | 0.228 – 0.581 |
| No (ref)                                                                               | -                | -     | -             |
| <b>Reason to work during the COVID-19 pandemic because of financial matters</b>        |                  |       |               |
| Yes                                                                                    | .099             | 1.521 | 0.924 – 2.504 |

|                                                                                              |             |       |               |
|----------------------------------------------------------------------------------------------|-------------|-------|---------------|
| No (ref)                                                                                     | -           | -     | -             |
| <b>Reason to work during the COVID-19 pandemic because already bound to working contract</b> |             |       |               |
| Yes                                                                                          | <b>.001</b> | 3.245 | 1.616 – 6.515 |
| No (ref)                                                                                     | -           | -     | -             |

**Supplementary Table 2.** Univariate analysis of determinants for anxiety among HCWs

| <b>Variables</b>                                                                                                       | <b>p value</b>   | <b>COR</b> | <b>95% CI</b> |
|------------------------------------------------------------------------------------------------------------------------|------------------|------------|---------------|
| <b>Age</b>                                                                                                             | <b>&lt; .001</b> | 0.942      | 0.919 – 0.966 |
| <b>Sex</b>                                                                                                             |                  |            |               |
| Male (ref)                                                                                                             | -                | -          | -             |
| Female                                                                                                                 | <b>.001</b>      | 2.070      | 1.332 – 3.218 |
| <b>Marital status</b>                                                                                                  |                  |            |               |
| Single (ref)                                                                                                           | -                | -          | -             |
| Married                                                                                                                | <b>.003</b>      | 0.484      | 0.298 – 0.785 |
| Married with children                                                                                                  | <b>.004</b>      | 0.481      | 0.293 – 0.789 |
| <b>Job</b>                                                                                                             |                  |            |               |
| Doctor (ref)                                                                                                           | -                | -          | -             |
| Nurse                                                                                                                  | .092             | 0.583      | 0.311 – 1.039 |
| Midwife                                                                                                                | .186             | 0.509      | 0.187 – 1.385 |
| Dentist                                                                                                                | .545             | 1.285      | 0.570 – 2.901 |
| Pharmacist                                                                                                             | .516             | 0.735      | 0.289 – 1.865 |
| Others (nutritionist, physiotherapist, laboratory analyst, acupuncturist, health educator, and hospital administrator) | .826             | 0.932      | 0.499 – 1.741 |
| <b>Workplace setting</b>                                                                                               |                  |            |               |
| COVID-19 hospital or referral hospital (ref)                                                                           | -                | -          | -             |
| Non-COVID-19 hospital                                                                                                  | <b>.024</b>      | 0.524      | 0.299 – 0.920 |
| Primary care or other healthcare facilities                                                                            | .140             | 0.716      | 0.460 – 1.116 |
| <b>Workplace island</b>                                                                                                |                  |            |               |
| Java Island (ref)                                                                                                      | -                | -          | -             |
| Outside Java Island                                                                                                    | .464             | 0.840      | 0.527 – 1.339 |
| <b>Working period during the COVID-19 pandemic</b>                                                                     |                  |            |               |
| Since the beginning of pandemic (ref)                                                                                  | -                | -          | -             |
| In the middle of pandemic                                                                                              | .197             | 1.379      | 0.847 – 2.246 |
| <b>Working experience before the COVID-19 pandemic</b>                                                                 |                  |            |               |
| Not working (ref)                                                                                                      | -                | -          | -             |
| <1 year                                                                                                                | .147             | 0.545      | 0.240 – 1.238 |
| 1–3 years                                                                                                              | .792             | 1.111      | 0.507 – 2.433 |
| >3 years                                                                                                               | <b>.012</b>      | 0.394      | 0.191 – 0.812 |
| <b>Income during the COVID-19 pandemic</b>                                                                             |                  |            |               |
| <3 million rupiah/month (ref)                                                                                          | -                | -          | -             |
| 3-5 million rupiah/month                                                                                               | .674             | 1.135      | 0.631 – 2.041 |
| 5-10 million rupiah/month                                                                                              | .851             | 1.058      | 0.590 – 1.895 |
| 10-20 million rupiah/month                                                                                             | .633             | 0.840      | 0.411 – 1.718 |
| >20 million rupiah/month                                                                                               | .246             | 0.640      | 0.301 – 1.361 |
| <b>Working hour per week during the COVID-19 pandemic</b>                                                              |                  |            |               |

|                                                                                        |                  |       |               |
|----------------------------------------------------------------------------------------|------------------|-------|---------------|
| <40 hours/week (ref)                                                                   | -                | -     | -             |
| 40–60 hours/week                                                                       | .263             | 1.268 | 0.836 – 1.923 |
| >60 hours/week                                                                         | .157             | 1.739 | 0.808 – 3.746 |
| <b>History of COVID-19 infection</b>                                                   |                  |       |               |
| Yes                                                                                    | .206             | 1.438 | 0.819 – 2.526 |
| No (ref)                                                                               | -                | -     | -             |
| <b>History of COVID-19 infection in the family</b>                                     |                  |       |               |
| Yes                                                                                    | .996             | 1.001 | 0.649 – 1.545 |
| No (ref)                                                                               | -                | -     | -             |
| <b>Any family member died because of COVID-19</b>                                      |                  |       |               |
| Yes                                                                                    | .462             | 1.356 | 0.602 – 3.051 |
| No (ref)                                                                               | -                | -     | -             |
| <b>Having one or more comorbidities</b>                                                |                  |       |               |
| Yes                                                                                    | .670             | 1.099 | 0.711 – 1.699 |
| No (ref)                                                                               | -                | -     | -             |
| <b>PPE availability in the workplace</b>                                               |                  |       |               |
| Not available or not according to standard (ref)                                       | -                | -     | -             |
| Available and according to standard                                                    | <b>.036</b>      | 0.638 | 0.419 – 0.970 |
| <b>Verbal intimidation in the workplace</b>                                            |                  |       |               |
| Never (ref)                                                                            | -                | -     | -             |
| At least once                                                                          | <b>.002</b>      | 1.940 | 1.283 – 2.933 |
| <b>Physical intimidation in the workplace</b>                                          |                  |       |               |
| Never (ref)                                                                            | -                | -     | -             |
| At least once                                                                          | .926             | 1.054 | 0.348 – 3.195 |
| <b>Intimidation from the society outside workplace</b>                                 |                  |       |               |
| Never (ref)                                                                            | -                | -     | -             |
| At least once                                                                          | <b>.024</b>      | 1.675 | 1.071 – 2.620 |
| <b>Workplace support from intimidation</b>                                             |                  |       |               |
| Yes (ref)                                                                              | -                | -     | -             |
| No                                                                                     | <b>.003</b>      | 2.263 | 1.332 – 3.845 |
| <b>Willingness to work during the COVID-19 pandemic</b>                                |                  |       |               |
| Yes                                                                                    | -                | -     | -             |
| No (ref)                                                                               | <b>&lt; .001</b> | 2.820 | 1.55 – 4.986  |
| <b>Reason for HCW to work during the COVID-19 pandemic because feeling responsible</b> |                  |       |               |
| Yes                                                                                    | <b>.001</b>      | 0.459 | 0.292 – 0.721 |
| No (ref)                                                                               | -                | -     | -             |
| <b>Reason to work during the COVID-19 pandemic because of financial matters</b>        |                  |       |               |
| Yes                                                                                    | <b>.040</b>      | 1.650 | 1.024 – 2.660 |

|                                                                                              |      |       |               |
|----------------------------------------------------------------------------------------------|------|-------|---------------|
| No (ref)                                                                                     | -    | -     | -             |
| <b>Reason to work during the COVID-19 pandemic because already bound to working contract</b> |      |       |               |
| Yes                                                                                          | .093 | 1.815 | 1.906 – 3.637 |
| No (ref)                                                                                     | -    | -     | -             |



**Supplementary Table 3.** Univariate analysis of determinants for stress among HCWs

| Variables                                                                                                              | <i>p</i> value   | COR   | 95% CI        |
|------------------------------------------------------------------------------------------------------------------------|------------------|-------|---------------|
| <b>Age</b>                                                                                                             | <b>&lt; .001</b> | 0.955 | 0.932 – 0.978 |
| <b>Sex</b>                                                                                                             |                  |       |               |
| Male (ref)                                                                                                             | -                | -     | -             |
| Female                                                                                                                 | .076             | 1.485 | 0.960 – 2.299 |
| <b>Marital status</b>                                                                                                  |                  |       |               |
| Single (ref)                                                                                                           | -                | -     | -             |
| Married                                                                                                                | <b>.020</b>      | 0.561 | 0.345 – 0.911 |
| Married with children                                                                                                  | .055             | 0.616 | 0.376 – 1.009 |
| <b>Job</b>                                                                                                             |                  |       |               |
| Doctor (ref)                                                                                                           | -                | -     | -             |
| Nurse                                                                                                                  | .311             | 0.722 | 0.385 – 1.355 |
| Midwife                                                                                                                | .644             | 0.796 | 0.302 – 2.097 |
| Dentist                                                                                                                | .706             | 1.170 | 0.518 – 2.642 |
| Pharmacist                                                                                                             | .506             | 1.365 | 0.546 – 3.408 |
| Others (nutritionist, physiotherapist, laboratory analyst, acupuncturist, health educator, and hospital administrator) | .853             | 1.061 | 0.566 – 1.989 |
| <b>Workplace setting</b>                                                                                               |                  |       |               |
| COVID-19 hospital or referral hospital (ref)                                                                           | -                | -     | -             |
| Non-COVID-19 hospital                                                                                                  | .321             | 0.754 | 0.432 – 1.317 |
| Primary care or other healthcare facilities                                                                            | .407             | 0.828 | 0.530 – 1.294 |
| <b>Workplace island</b>                                                                                                |                  |       |               |
| Java Island (ref)                                                                                                      | -                | -     | -             |
| Outside Java Island                                                                                                    | .607             | 0.884 | 0.553 – 1.414 |
| <b>Working period during the COVID-19 pandemic</b>                                                                     |                  |       |               |
| Since the beginning of pandemic (ref)                                                                                  | -                | -     | -             |
| In the middle of pandemic                                                                                              | .742             | 0.920 | 0.561 – 1.511 |
| <b>Working experience before the COVID-19 pandemic</b>                                                                 |                  |       |               |
| Not working (ref)                                                                                                      | -                | -     | -             |
| <1 year                                                                                                                | .261             | 0.624 | 0.274 – 1.421 |
| 1–3 years                                                                                                              | .403             | 1.390 | 0.642 – 3.011 |
| >3 years                                                                                                               | .228             | 0.644 | 0.315 – 1.317 |
| <b>Income during the COVID-19 pandemic</b>                                                                             |                  |       |               |
| <3 million rupiah/month (ref)                                                                                          | -                | -     | -             |
| 3-5 million rupiah/month                                                                                               | .100             | 1.655 | 0.909 – 3.013 |
| 5-10 million rupiah/month                                                                                              | .236             | 1.434 | 0.790 – 2.604 |
| 10-20 million rupiah/month                                                                                             | .584             | 1.225 | 0.593 – 2.531 |
| >20 million rupiah/month                                                                                               | .357             | 0.89  | 0.312 – 1.522 |
| <b>Working hour per week during the COVID-19 pandemic</b>                                                              |                  |       |               |

|                                                                                        |                  |       |               |
|----------------------------------------------------------------------------------------|------------------|-------|---------------|
| <40 hours/week (ref)                                                                   | -                | -     | -             |
| 40–60 hours/week                                                                       | .359             | 1.217 | 0.800 – 1.852 |
| >60 hours/week                                                                         | .321             | 1.473 | 0.685 – 3.168 |
| <b>History of COVID-19 infection</b>                                                   |                  |       |               |
| Yes                                                                                    | .532             | 1.197 | 0.681 – 2.106 |
| No (ref)                                                                               | -                | -     | -             |
| <b>History of COVID-19 infection in the family</b>                                     |                  |       |               |
| Yes                                                                                    | .935             | 0.982 | 0.634 – 1.521 |
| No (ref)                                                                               | -                | -     | -             |
| <b>Any family member died because of COVID-19</b>                                      |                  |       |               |
| Yes                                                                                    | .143             | 1.841 | 0.814 – 4.167 |
| No (ref)                                                                               | -                | -     | -             |
| <b>Having one or more comorbidities</b>                                                |                  |       |               |
| Yes                                                                                    | .437             | 1.190 | 0.768 – 1.843 |
| No (ref)                                                                               | -                | -     | -             |
| <b>PPE availability in the workplace</b>                                               |                  |       |               |
| Not available or not according to standard (ref)                                       | -                | -     | -             |
| Available and according to standard                                                    | <b>.019</b>      | 0.602 | 0.395 – 0.919 |
| <b>Verbal intimidation in the workplace</b>                                            |                  |       |               |
| Never (ref)                                                                            | -                | -     | -             |
| At least once                                                                          | <b>.025</b>      | 1.604 | 1.061 – 2.425 |
| <b>Physical intimidation in the workplace</b>                                          |                  |       |               |
| Never (ref)                                                                            | -                | -     | -             |
| At least once                                                                          | .377             | 1.650 | 0.544 – 5.003 |
| <b>Intimidation from the society outside workplace</b>                                 |                  |       |               |
| Never (ref)                                                                            | -                | -     | -             |
| At least once                                                                          | <b>.019</b>      | 1.708 | 1.091 – 2.673 |
| <b>Workplace support from intimidation</b>                                             |                  |       |               |
| Yes (ref)                                                                              | -                | -     | -             |
| No                                                                                     | <b>.005</b>      | 2.129 | 1.261 – 3.595 |
| <b>Willingness to work during the COVID-19 pandemic</b>                                |                  |       |               |
| Yes                                                                                    | -                | -     | -             |
| No (ref)                                                                               | <b>&lt; .001</b> | 2.781 | 1.586 – 4.874 |
| <b>Reason for HCW to work during the COVID-19 pandemic because feeling responsible</b> |                  |       |               |
| Yes                                                                                    | <b>&lt; .001</b> | 0.427 | 0.271 – 0.671 |
| No (ref)                                                                               | -                | -     | -             |
| <b>Reason to work during the COVID-19 pandemic because of financial matters</b>        |                  |       |               |
| Yes                                                                                    | <b>.001</b>      | 2.193 | 1.355 – 3.549 |

|                                                                                              |             |       |               |
|----------------------------------------------------------------------------------------------|-------------|-------|---------------|
| No (ref)                                                                                     | -           | -     | -             |
| <b>Reason to work during the COVID-19 pandemic because already bound to working contract</b> |             |       |               |
| Yes                                                                                          | <b>.006</b> | 2.698 | 1.323 – 5.501 |
| No (ref)                                                                                     | -           | -     | -             |

**Supplementary Table 4.** Univariate analysis of determinants for impaired physical health component among HCWs

| <b>Variables</b>                                                                                                       | <b>p value</b> | <b>COR</b> | <b>95% CI</b>  |
|------------------------------------------------------------------------------------------------------------------------|----------------|------------|----------------|
| <b>Age</b>                                                                                                             | .134           | 1.033      | 0.990 – 1.079  |
| <b>Sex</b>                                                                                                             |                |            |                |
| Male (ref)                                                                                                             | -              | -          | -              |
| Female                                                                                                                 | .633           | 0.836      | 0.401 – 1.744  |
| <b>Marital status</b>                                                                                                  |                |            |                |
| Single (ref)                                                                                                           | -              | -          | -              |
| Married                                                                                                                | .318           | 1.496      | 0.878 – 3.299  |
| Married with children                                                                                                  | .214           | 1.703      | 0.735 – 3.945  |
| <b>Job</b>                                                                                                             |                |            |                |
| Doctor (ref)                                                                                                           | -              | -          | -              |
| Nurse                                                                                                                  | .310           | 0.621      | 0.248 – 1.557  |
| Midwife                                                                                                                | .802           | 0.821      | 0.177 – 3.813  |
| Dentist                                                                                                                | .285           | 0.531      | 0.167 – 1.695  |
| Pharmacist                                                                                                             | .564           | 1.836      | 0.233 – 14.441 |
| Others (nutritionist, physiotherapist, laboratory analyst, acupuncturist, health educator, and hospital administrator) | .915           | 1.063      | 0.346 – 3.263  |
| <b>Workplace setting</b>                                                                                               |                |            |                |
| COVID-19 hospital or referral hospital (ref)                                                                           | -              | -          | -              |
| Non-COVID-19 hospital                                                                                                  | .298           | 0.633      | 0.267 – 1.499  |
| Primary care or other healthcare facilities                                                                            | .944           | 0.973      | 0.448 – 2.113  |
| <b>Workplace island</b>                                                                                                |                |            |                |
| Java Island (ref)                                                                                                      | -              | -          | -              |
| Outside Java Island                                                                                                    | .095           | 2.284      | 0.865 – 6.026  |
| <b>Working period during the COVID-19 pandemic</b>                                                                     |                |            |                |
| Since the beginning of pandemic (ref)                                                                                  | -              | -          | -              |
| In the middle of pandemic                                                                                              | .659           | 0.837      | 0.380 – 1.846  |
| <b>Working experience before the COVID-19 pandemic</b>                                                                 |                |            |                |
| Not working (ref)                                                                                                      | -              | -          | -              |
| <1 year                                                                                                                | .090           | 0.163      | 0.020 – 1.328  |
| 1–3 years                                                                                                              | .143           | 0.210      | 0.026 – 1.693  |
| >3 years                                                                                                               | .281           | 0.323      | 0.042 – 2.517  |
| <b>Income during the COVID-19 pandemic</b>                                                                             |                |            |                |
| <3 million rupiah/month (ref)                                                                                          | -              | -          | -              |
| 3-5 million rupiah/month                                                                                               | .555           | 1.423      | 0.441 – 4.591  |
| 5-10 million rupiah/month                                                                                              | .052           | 0.385      | 0.147 – 1.008  |
| 10-20 million rupiah/month                                                                                             | .680           | 1.352      | 0.322 – 5.670  |
| >20 million rupiah/month                                                                                               | .794           | 1.211      | 0.288 – 5.096  |
| <b>Working hour per week during the</b>                                                                                |                |            |                |

|                                                                                        |      |       |                |
|----------------------------------------------------------------------------------------|------|-------|----------------|
| <b>COVID-19 pandemic</b>                                                               |      |       |                |
| <40 hours/week (ref)                                                                   | -    | -     | -              |
| 40–60 hours/week                                                                       | .706 | 1.146 | 0.565 – 2.325  |
| >60 hours/week                                                                         | .626 | 0.750 | 0.236 – 2.386  |
| <b>History of COVID-19 infection</b>                                                   |      |       |                |
| Yes                                                                                    | .818 | 0.898 | 0.357 – 2.255  |
| No (ref)                                                                               | -    | -     | -              |
| <b>History of COVID-19 infection in the family</b>                                     |      |       |                |
| Yes                                                                                    | .342 | 0.713 | 0.35 – 1.433   |
| No (ref)                                                                               | -    | -     | -              |
| <b>Any family member died because of COVID-19</b>                                      |      |       |                |
| Yes                                                                                    | .278 | 0.536 | 0.174 – 1.653  |
| No (ref)                                                                               | -    | -     | -              |
| <b>Having one or more comorbidities</b>                                                |      |       |                |
| Yes                                                                                    | .778 | 0.901 | 0.438 – 1.854  |
| No (ref)                                                                               | -    | -     | -              |
| <b>PPE availability in the workplace</b>                                               |      |       |                |
| Not available or not according to standard (ref)                                       | -    | -     | -              |
| Available and according to standard                                                    | .285 | 0.662 | 0.312 – 1.408  |
| <b>Verbal intimidation in the workplace</b>                                            |      |       |                |
| Never (ref)                                                                            | -    | -     | -              |
| At least once                                                                          | .876 | 1.057 | 0.528 – 2.113  |
| <b>Physical intimidation in the workplace</b>                                          |      |       |                |
| Never (ref)                                                                            | -    | -     | -              |
| At least once                                                                          | .805 | 1.298 | 0.164 – 10.268 |
| <b>Intimidation from the society outside workplace</b>                                 |      |       |                |
| Never (ref)                                                                            | -    | -     | -              |
| At least once                                                                          | .366 | 1.456 | 0.645 – 3.285  |
| <b>Workplace support from intimidation</b>                                             |      |       |                |
| Yes (ref)                                                                              | -    | -     | -              |
| No                                                                                     | .589 | 0.796 | 0.348 – 1.820  |
| <b>Willingness to work during the COVID-19 pandemic</b>                                |      |       |                |
| Yes                                                                                    | -    | -     | -              |
| No (ref)                                                                               | .996 | 1.002 | 0.400 – 2.509  |
| <b>Reason for HCW to work during the COVID-19 pandemic because feeling responsible</b> |      |       |                |
| Yes                                                                                    | .080 | 1.857 | 0.929 – 3.712  |
| No (ref)                                                                               | -    | -     | -              |
| <b>Reason to work during the COVID-19 pandemic because of financial matters</b>        |      |       |                |

|                                                                                              |      |       |               |
|----------------------------------------------------------------------------------------------|------|-------|---------------|
| Yes                                                                                          | .071 | 0.517 | 0.252 – 1.059 |
| No (ref)                                                                                     | -    | -     | -             |
| <b>Reason to work during the COVID-19 pandemic because already bound to working contract</b> |      |       |               |
| Yes                                                                                          | .722 | 1.199 | 0.350 – 4.113 |
| No (ref)                                                                                     | -    | -     | -             |

**Supplementary Table 5.** Univariate analysis of determinants for impaired mental health component among HCWs

| Variables                                                                                                              | <i>p</i> value | COR   | 95% CI        |
|------------------------------------------------------------------------------------------------------------------------|----------------|-------|---------------|
| <b>Age</b>                                                                                                             | .973           | 1.000 | 0.978 – 1.021 |
| <b>Sex</b>                                                                                                             |                |       |               |
| Male (ref)                                                                                                             | -              | -     | -             |
| Female                                                                                                                 | .748           | 0.932 | 0.605 – 1.434 |
| <b>Marital status</b>                                                                                                  |                |       |               |
| Single (ref)                                                                                                           | -              | -     | -             |
| Married                                                                                                                | .266           | 1.319 | 0.810 – 2.148 |
| Married with children                                                                                                  | .263           | 1.329 | 0.808 – 2.187 |
| <b>Job</b>                                                                                                             |                |       |               |
| Doctor (ref)                                                                                                           | -              | -     | -             |
| Nurse                                                                                                                  | .057           | 1.804 | 0.983 – 3.310 |
| Midwife                                                                                                                | .958           | 0.975 | 0.369 – 2.571 |
| Dentist                                                                                                                | .777           | 0.884 | 0.377 – 2.072 |
| Pharmacist                                                                                                             | .273           | 1.671 | 0.668 – 4.179 |
| Others (nutritionist, physiotherapist, laboratory analyst, acupuncturist, health educator, and hospital administrator) | .994           | 1.002 | 0.527 – 1.907 |
| <b>Workplace setting</b>                                                                                               |                |       |               |
| COVID-19 hospital or referral hospital (ref)                                                                           | -              | -     | -             |
| Non-COVID-19 hospital                                                                                                  | .752           | 1.093 | 0.629 – 1.898 |
| Primary care or other healthcare facilities                                                                            | .391           | 0.820 | 0.521 – 1.290 |
| <b>Workplace island</b>                                                                                                |                |       |               |
| Java Island (ref)                                                                                                      | -              | -     | -             |
| Outside Java Island                                                                                                    | .961           | 0.988 | 0.617 – 1.582 |
| <b>Working period during the COVID-19 pandemic</b>                                                                     |                |       |               |
| Since the beginning of pandemic (ref)                                                                                  | -              | -     | -             |
| In the middle of pandemic                                                                                              | .729           | 1.092 | 0.665 – 1.790 |
| <b>Working experience before the COVID-19 pandemic</b>                                                                 |                |       |               |
| Not working (ref)                                                                                                      | -              | -     | -             |
| <1 year                                                                                                                | .252           | 1.619 | 0.710 – 3.689 |
| 1–3 years                                                                                                              | .502           | 0.760 | 0.342 – 1.691 |
| >3 years                                                                                                               | .937           | 1.030 | 0.497 – 2.134 |
| <b>Income during the COVID-19 pandemic</b>                                                                             |                |       |               |
| <3 million rupiah/month (ref)                                                                                          | -              | -     | -             |
| 3-5 million rupiah/month                                                                                               | .187           | 1.510 | 0.818 – 2.785 |
| 5-10 million rupiah/month                                                                                              | .050           | 1.833 | 1.001 – 3.358 |
| 10-20 million rupiah/month                                                                                             | .919           | 1.040 | 0.490 – 2.208 |
| >20 million rupiah/month                                                                                               | .612           | 1.219 | 0.567 – 2.622 |
| <b>Working hour per week during the</b>                                                                                |                |       |               |

|                                                                                        |      |       |               |
|----------------------------------------------------------------------------------------|------|-------|---------------|
| <b>COVID-19 pandemic</b>                                                               |      |       |               |
| <40 hours/week (ref)                                                                   | -    | -     | -             |
| 40–60 hours/week                                                                       | .177 | 1.338 | 0.877 – 2.040 |
| >60 hours/week                                                                         | .899 | 0.950 | 0.429 – 2.105 |
| <b>History of COVID-19 infection</b>                                                   |      |       |               |
| Yes                                                                                    | .841 | 0.943 | 0.430 – 1.678 |
| No (ref)                                                                               | -    | -     | -             |
| <b>History of COVID-19 infection in the family</b>                                     |      |       |               |
| Yes                                                                                    | .829 | 0.953 | 0.612 – 1.482 |
| No (ref)                                                                               | -    | -     | -             |
| <b>Any family member died because of COVID-19</b>                                      |      |       |               |
| Yes                                                                                    | .388 | 1.429 | 0.635 – 3.220 |
| No (ref)                                                                               | -    | -     | -             |
| <b>Having one or more comorbidities</b>                                                |      |       |               |
| Yes                                                                                    | .475 | 0.850 | 0.544 – 1.328 |
| No (ref)                                                                               | -    | -     | -             |
| <b>PPE availability in the workplace</b>                                               |      |       |               |
| Not available or not according to standard (ref)                                       | -    | -     | -             |
| Available and according to standard                                                    | .424 | 0.841 | 0.550 – 1.286 |
| <b>Verbal intimidation in the workplace</b>                                            |      |       |               |
| Never (ref)                                                                            | -    | -     | -             |
| At least once                                                                          | .626 | 0.901 | 0.593 – 1.369 |
| <b>Physical intimidation in the workplace</b>                                          |      |       |               |
| Never (ref)                                                                            | -    | -     | -             |
| At least once                                                                          | .920 | 0.944 | 0.303 – 2.939 |
| <b>Intimidation from the society outside workplace</b>                                 |      |       |               |
| Never (ref)                                                                            | -    | -     | -             |
| At least once                                                                          | .893 | 0.969 | 0.615 – 1.527 |
| <b>Workplace support from intimidation</b>                                             |      |       |               |
| Yes (ref)                                                                              | -    | -     | -             |
| No                                                                                     | .099 | 1.548 | 0.920 – 2.604 |
| <b>Willingness to work during the COVID-19 pandemic</b>                                |      |       |               |
| Yes                                                                                    | -    | -     | -             |
| No (ref)                                                                               | .300 | 0.740 | 0.418 – 1.308 |
| <b>Reason for HCW to work during the COVID-19 pandemic because feeling responsible</b> |      |       |               |
| Yes                                                                                    | .307 | 0.791 | 0.504 – 1.240 |
| No (ref)                                                                               | -    | -     | -             |
| <b>Reason to work during the COVID-19 pandemic because of financial matters</b>        |      |       |               |



|                                                                                              |      |       |               |
|----------------------------------------------------------------------------------------------|------|-------|---------------|
| Yes                                                                                          | .140 | 1.434 | 0.888 – 2.314 |
| No (ref)                                                                                     | -    | -     | -             |
| <b>Reason to work during the COVID-19 pandemic because already bound to working contract</b> |      |       |               |
| Yes                                                                                          | .238 | 0.640 | 0.305 – 1.342 |
| No (ref)                                                                                     | -    | -     | -             |
